# Supplementary material for: Changes in Hematologic Lab Measures Observed in Patients with Paroxysmal Nocturnal Hemoglobinuria Treated with C5 Inhibitors, Ravulizumab and Eculizumab: Real-World Evidence from a US Based EMR Network
Source: Hematol Rep. 2023 Apr 21;15(2):266–82. doi: 10.3390/hematolrep15020027 (PMC10123631; doi:10.3390/hematolrep15020027)
Supplement: Supplementary file 1 [file hematolrep-15-00027-s001.zip › TriNetX Ms_TableS2 Codes.xlsx]

## Sheet: Labs
	RAVU - No prior Tx	RAVU - Prior Tx	ECU	Comments		RAVU - No prior Tx (n=33)						RAVU - Prior Tx (n=43)						ECU (n=143)
Baseline						N	Mean	SD	Median	IQR LL	IQR UL	N	Mean	SD	Median	IQR LL	IQR UL	N	Mean	SD	Median	IQR LL	IQR UL
Hb n					Baseline
Mean Hb					Hb	29	10.3172	1.90489	10.4	9.3	11.4	39	11.1538	2.17556	11.3	9.3	13	126	9.99683	2.25994	9.8	8.4	11.2
SD Hb					LDH	26	478.423	416.342	281	241	684	32	440.938	337.211	301.5	223.5	477.5	89	603.888	566.967	372	228	677
LDH n					ARC	11	71.3809	91.7957	54	0.1091	141.4	19	94.5466	108.482	66.6	0.0916	164	43	79.1595	98.7794	14.5	0.2	145.2
Mean LDH				Maybe add medians too?	1-90 days post-index (3 mo)
SD LDH					Hb	16	10.3187	2.00274	10.5	9.05	11.85	28	10.9607	2.56881	10.8	9	13.25	93	9.91398	2.22323	10	8.3	11
ARC n				ARC= Absolute reticulocyte count	LDH	13	280.846	166.544	230	212	272	21	445.381	403.826	258	221	562	67	331.388	196.04	247	186	492
Mean ARC					ARC	4	105.176	158.154	43.0701	0.10155	210.25	5	77.9508	84.8655	60.4	0.178	138.2	19	113.357	111.935	91.5	0.27	183
SD ARC					91-180 days post-index (6 mo)
					Hb	14	10.9214	1.89906	11	9.4	12.2	27	10.5667	2.35241	10	8.5	12.5	66	10.3788	2.23369	10.2	9	11.9
3 mo					LDH	13	312.385	207.78	244	226	276	20	451.55	438.486	269.5	231.5	532	48	379.292	244.531	272	198.5	532.5
Hb n					ARC	2	0.18725	0.162988	0.18725	0.072	0.3025	7	92.4104	134.849	0.1899	0.1	254.4	11	135.252	97.2993	125.9	48.7	190.4
Mean Hb					181-365 days post-index (12 mo)
SD Hb					Hb	10	10.43	2.60344	11.05	7.7	12.6	25	10.9	3.01413	10.7	9.3	12.7	65	10.5508	2.07779	10.6	9.1	11.9
LDH n					LDH	8	241.25	64.1421	235.5	211.5	282.5	19	418.737	360.725	249	223	581	49	373.265	242.846	265	227	413
Mean LDH					ARC	3	107.457	185.973	0.1068	0.065	322.2	7	135.949	150.675	67.1	0.1738	293	16	113.652	117.525	90.35	0.32465	180.1
SD LDH
ARC n
Mean ARC
SD ARC
6 mo
Hb n
Mean Hb
SD Hb
LDH n
Mean LDH
SD LDH
ARC n
Mean ARC
SD ARC
12 mo
Hb n
Mean Hb
SD Hb
LDH n
Mean LDH
SD LDH
ARC n
Mean ARC
SD ARC

## Sheet: CFB
	RAVU - No prior Tx	RAVU - Prior Tx	ECU	Comments		RAVU - No prior Tx (n=33)						RAVU - Prior Tx (n=43)						ECU (n=143)
Baseline to 3 mo				CFB= Change from baseline		N	Mean	SD	Median	IQR LL	IQR UL	N	Mean	SD	Median	IQR LL	IQR UL	N	Mean	SD	Median	IQR LL	IQR UL
Hb CFB n				n = Pts with Hb available at baseline & 3mo	Baseline to 1-90 days post-index (3 mo)
Mean baseline Hb				For pts with baseline & 3 mo data available. Exclude pts without 3 mo data	Hb
Mean Hb CFB					Hb baseline	16	10.3562	2.17653	10.2	8.8	11.5	26	10.85	2.31175	10.9	9.2	12.3	90	9.66111	2.11499	9.75	8.2	11
Mean ending Hb					Hb 3 mo	16	10.3187	2.00274	10.5	9.05	11.85	26	11.0269	2.5185	10.8	9.1	13.3	90	9.85333	2.1783	9.9	8.3	11
SD Hb CFB					Hb CFB	16	-0.0375	1.99228	0.35	-0.3	0.8	26	0.176923	0.830088	0.1	-0.3	0.5	90	0.192222	1.41954	0	-0.6	0.8
LDH CFB n					LDH
Mean baseline LDH					LDH baseline	12	596.333	545.937	288	251.5	923	20	489.3	388.87	323	237	549	59	688.932	609.786	468	247	721
Mean LDH CFB					LDH 3 mo	12	237.75	62.5999	221.5	209.5	271.5	20	454.55	412.068	248.5	217	592	59	309.441	176.906	234	185	369
Mean ending LDH					LDH CFB	12	-358.583	539.806	-88.5	-678.5	-9	20	-34.75	193.103	-17	-106.5	16	59	-379.492	571.976	-82	-471	1
SD LDH CFB					ARC
ARC CFB n					ARC baseline	3	18.0546	31.1296	0.1069	0.057	54	5	69.9113	70.8682	66.6	0.0916	134.2	15	93.4496	94.5638	73.7	0.2665	165
Mean baseline ARC					ARC 3 mo	3	28.7344	49.5935	0.1401	0.063	86	5	77.9508	84.8655	60.4	0.178	138.2	15	106.233	105.447	76.8	0.27	183
Mean ARC CFB					ARC CFB	3	10.6797	18.4639	0.0332	0.006	32	5	8.03948	19.4973	0.0864	0.011	4	15	12.7829	55.0946	5	-0.083	33.6
Mean ending ARC					Baseline to 91-180 days post-index (6 mo)
SD ARC CFB					Hb
					Hb baseline	14	10.7357	2.24417	10.85	9.4	12.1	27	10.7778	2.42143	10.9	8.9	13.1	63	9.74444	2.01405	9.8	8.4	11
Baseline to 6 mo					Hb 6 mo	14	10.9214	1.89906	11	9.4	12.2	27	10.5667	2.35241	10	8.5	12.5	63	10.2937	2.21023	10.1	8.9	11.9
Hb CFB n					Hb CFB	14	0.185714	1.18182	0.4	-0.3	1	27	-0.211111	1.4627	0	-0.5	0.7	63	0.549206	1.82861	0.5	-0.6	1.3
Mean baseline Hb					LDH
Mean Hb CFB					LDH baseline	12	474.417	512.898	260	206.5	496.5	20	489.7	388.542	323	237.5	548.5	42	642.81	585.666	398.5	244	701
Mean ending Hb					LDH 6 mo	12	292.917	204.26	240	224.5	266	20	451.55	438.486	269.5	231.5	532	42	352.095	234.711	262	189	483
SD Hb CFB					LDH CFB	12	-181.5	491.371	-3	-61	25.5	20	-38.15	253.419	-31.5	-136	35.5	42	-290.714	582.578	-81.5	-466	33
LDH CFB n					ARC
Mean baseline LDH					ARC baseline	2	0.1453	0.124875	0.1453	0.057	0.2336	7	70.2965	106.754	0.1791	0.065	148.6	8	106.835	108.135	87.95	9.95	191.15
Mean LDH CFB					ARC 6 mo	2	0.18725	0.162988	0.18725	0.072	0.3025	7	92.4104	134.849	0.1899	0.1	254.4	8	138.696	111.938	139	36.1	223.2
Mean ending LDH					ARC CFB	2	0.04195	0.0381131	0.04195	0.015	0.0689	7	22.1138	39.2677	0.06	0.0108	36.4	8	31.8614	48.6866	21.65	-3.6045	67.15
SD LDH CFB					Baseline to 181-365 days post-index (12 mo)
ARC CFB n					Hb
Mean baseline ARC					Hb baseline	10	10.77	2.36129	10.85	8.4	12.8	25	10.864	2.332	10.9	9.2	12.3	62	9.81935	1.99974	9.8	8.5	11.2
Mean ARC CFB					Hb 12 mo	10	10.43	2.60344	11.05	7.7	12.6	25	10.9	3.01413	10.7	9.3	12.7	62	10.4516	2.05384	10.35	9	11.8
Mean ending ARC					Hb CFB	10	-0.34	3.00193	0.35	-1.7	1.5	25	0.036	2.26014	0.4	-0.3	1	62	0.632258	1.90889	0.35	-0.5	1.7
SD ARC CFB					LDH
					LDH baseline	8	618.125	620.457	256.5	185.5	1055	19	485.895	401.382	298	224	620	42	602.881	567.896	345	224	694
Baseline to 12 mo					LDH 12 mo	8	241.25	64.1421	235.5	211.5	282.5	19	418.737	360.725	249	223	581	42	348.69	224.818	257.5	223	341
Hb CFB n					LDH CFB	8	-376.875	636.937	-19	-819.5	63	19	-67.1579	192.38	-16	-109	1	42	-254.19	564.025	-38.5	-360	17
Mean baseline Hb					ARC
Mean Hb CFB					ARC baseline	3	95.9554	166.056	0.1091	0.057	287.7	6	130.875	131.32	107.6	0.1791	276.5	14	96.7049	101.494	79.8	0.1001	165
Mean ending Hb					ARC 12 mo	3	107.457	185.973	0.1068	0.065	322.2	6	158.574	151.471	173.1	0.1738	293	14	117.947	121.265	90.35	0.337	193.1
SD Hb CFB					ARC CFB	3	11.5019	19.9169	0.008	-0.0023	34.5	6	27.6988	52.3211	0.249	-0.0053	35.5	14	21.2418	50.3968	6.7	-0.012	47.9
LDH CFB n
Mean baseline LDH
Mean LDH CFB
Mean ending LDH
SD LDH CFB
ARC CFB n
Mean baseline ARC
Mean ARC CFB
Mean ending ARC
SD ARC CFB

## Sheet: Transfusions
	RAVU - No prior Tx	RAVU - Prior Tx	ECU	Comments		RAVU - No prior Tx (n=33)						RAVU - Prior Tx (n=43)						ECU (n=143)
Baseline to 1 mo						N	Mean	SD	Median	IQR LL	IQR UL	N	Mean	SD	Median	IQR LL	IQR UL	N	Mean	SD	Median	IQR LL	IQR UL
Pts with transfusion events data available				Should equal sum of next three lines	Including 0 counts in distribution
Pts with transfusions with transfusion units data available					Baseline to 1 mo (1-30 days)	33	0.0606061	0.242306	0	0	0	43	0.0697674	0.25777	0	0	0	143	0.300699	1.13854	0	0	0
Pts with transfusions without number of units data available				Transfusion encounters data are available but not number of units transfused at the encounter	Baseline to 3 mo (1-90 days)	33	0.393939	1.61902	0	0	0	43	0.139535	0.639248	0	0	0	143	0.727273	2.77103	0	0	0
Pts without transfusions					Baseline to 6 mo (1-180 days)	33	0.515151	1.93845	0	0	0	43	0.209302	0.887966	0	0	0	143	1.2028	4.36142	0	0	0
Total number of transfusion events				Total number of transfusion encounters should equal sum of next 4 lines	Baseline to 12 mo (1-365 days)	33	0.69697	2.08394	0	0	0	43	0.27907	1.22135	0	0	0	143	1.75524	6.72521	0	0	1
Transfusions of 1-2 units				Number of PRBCs transfused during the encounter (if available)	Not including 0 counts in distribution
Transfusions of 3-4 units					Baseline to 1 mo (1-30 days)	2	1	0	1	1	1	3	1	0	1	1	1	19	2.26316	2.3533	1	1	3
Transfusions of 5+ units					Baseline to 3 mo (1-90 days)	2	6.5	2.12132	6.5	5	8	3	2	1.73205	1	1	4	28	3.71429	5.37385	1	1	4
Transfusion units not specified					Baseline to 6 mo (1-180 days)	3	5.66667	4.04145	5	2	10	3	3	2	3	1	5	32	5.375	7.99899	2	1	5
Total number of units transfused					Baseline to 12 mo (1-365 days)	5	4.6	3.50714	5	2	5	3	4	3	4	1	7	36	6.97222	12.0866	2.5	1	6
Baseline to 3 mo
Pts with transfusion events data available
Pts with transfusions with transfusion units data available
Pts with transfusions without number of units data available
Pts without transfusions
Total number of transfusion events
Transfusions of 1-2 units				(if available)
Transfusions of 3-4 units
Transfusions of 5+ units
Transfusion units not specified
Total number of units transfused
Baseline to 6 mo
Pts with transfusion events data available
Pts with transfusions with transfusion units data available
Pts with transfusions without number of units data available
Pts without transfusions
Total number of transfusion events
Transfusions of 1-2 units				(if available)
Transfusions of 3-4 units
Transfusions of 5+ units
Transfusion units not specified
Total number of units transfused
Baseline to 12 mo
Pts with transfusion events data available
Pts with transfusions with transfusion units data available
Pts with transfusions without number of units data available
Pts without transfusions
Total number of transfusion events
Transfusions of 1-2 units
Transfusions of 3-4 units
Transfusions of 5+ units
Transfusion units not specified
Total number of units transfused

## Sheet: Hb distribution
	RAV-No prior Tx (n=33)		RAV-Prior Tx (n=43)		ECU (n=143)
Baseline	n	%	n	%	n	%
Total patients (n)	29		39		126
Hb <=7.9	4	0.137931	4	0.102564	23	0.18254
Hb 8 to 9.9	8	0.275862	7	0.179487	43	0.34127
Hb 10 to 11.9	12	0.413793	13	0.333333	37	0.293651
Hb 12+	15	0.517241	15	0.384615	23	0.18254
1-90 days post-index (3 mo)
Patients who did not receive transfusions in the 1-90 days post-index (n)	14		25		66
Hb <=7.9	2	0.142857	2	0.08	5	0.0757576
Hb 8 to 9.9	3	0.214286	7	0.28	19	0.287879
Hb 10 to 11.9	5	0.357143	6	0.24	24	0.363636
Hb 12+	4	0.285714	10	0.4	18	0.272727
Patients who did receive transfusions in the 1-90 days post-index (n)	2		3		27
Hb <=7.9	1	0.5	1	0.333333	14	0.518519
Hb 8 to 9.9	1	0.5	1	0.333333	8	0.296296
Hb 10 to 11.9	0	0	1	0.333333	4	0.148148
Hb 12+	0	0	0	0	1	0.037037
91-180 days post-index (6 mo)
Patients who did not receive transfusions in the 1-180 days post-index (n)	12		24		47
Hb <=7.9	0	0	2	0.0833333	1	0.0212766
Hb 8 to 9.9	3	0.25	8	0.333333	14	0.297872
Hb 10 to 11.9	4	0.333333	7	0.291667	17	0.361702
Hb 12+	5	0.416667	7	0.291667	15	0.319149
Patients who did receive transfusions in the 1-180 days post-index (n)	2		3		19
Hb <=7.9	1	0.5	0	0	8	0.421053
Hb 8 to 9.9	1	0.5	3	1	7	0.368421
Hb 10 to 11.9	0	0	0	0	3	0.157895
Hb 12+	0	0	0	0	1	0.0526316
181-365 days (12 mo)
Patients who did not receive transfusions in the 1-365 days post-index (n)	7		22		44
Hb <=7.9	0	0	1	0.0454545	2	0.0454545
Hb 8 to 9.9	0	0	8	0.363636	10	0.227273
Hb 10 to 11.9	2	0.285714	2	0.0909091	20	0.454545
Hb 12+	5	0.714286	11	0.5	12	0.272727
Patients who did receive transfusions in the 1-365 days post-index (n)	3		3		21
Hb <=7.9	3	1	1	0.333333	6	0.285714
Hb 8 to 9.9	0	0	2	0.666667	8	0.380952
Hb 10 to 11.9	0	0	0	0	5	0.238095
Hb 12+	0	0	0	0	2	0.0952381

## Sheet: Hb perf
		RAV-No prior Tx	RAV-Prior Tx	ECU	Comments							RAV-No prior Tx (n=33)		RAV-Prior Tx (n=43)		ECU (n=143)
Baseline to 3 mo											Baseline to 1-90 days (3 mo)	n	%	n	%	n	%		Changes in hemoglobin from baseline to relevant time periods, taking into account transfusions. Hb time frames include: Baseline: Latest of Hb measured in 365 days prior to up to the same day as the index treatment. 1-90 days (3mo): Hb measured in the 1-90 days post-index. 91-180 days (6mo): Hb measured in the 81-180 days post-index. 181-365 days (12mo): Hb measured in the 181-365 days post-index…
Total patients (n)					Number of patients for whom baseline, 3 mo, and transfusion data are available. Should be equal to the sum of the next 5 lines						Total patients with baseline Hb and Hb in 1-90 days post-index	16		26		90
Pts receiving transfusions (n)	Transfusions										Patients with transfusions in the 1-90 days post-index	2	0.125	3	0.115385	27	0.3
Pts who did not receive transfusions & had a Hb 1g or more change above their baseline value (n)	Last value more than 1+ of baseline				Take the last hemoglobin value at 3mo or the date closest to the 3 month hemoglobin lab test						No transfusions in the 1-90 days post-index:
Pts who did not receive transfusions & had a Hb within 1g of their baseline value (n)	Last value within +/- 0.99 of baseline				Take the last hemoglobin value at 3mo or the date closest to the 3 month hemoglobin lab test						Last value more than 1+ of baseline	2	0.125	4	0.153846	17	0.188889
Pts who did not receive transfusions & had a Hb 1 to 2g less than their baseline value (n)	Last value less than 1-1.99 of baseline				Take the last hemoglobin value at 3mo or the date closest to the 3 month hemoglobin lab test						Last value within +/- 0.99 of baseline	10	0.625	17	0.653846	38	0.422222
Pts who did not receive transfusions & had a Hb 2g or more less than baseline (n)	Last value 2+ less of baseline										Last value less than 1-1.99 of baseline	1	0.0625	2	0.0769231	7	0.0777778
Pts who did not receive transfusions & had a Hb 1 to 2g less than baseline at any point	Any value (max value) 1-1.99 less of baseline										Last value 2+ less of baseline	1	0.0625	0	0	1	0.0111111
Pts who did not receive transfusions & had a Hb 2g or more less than baseline at any point	Any value (max value) 2+ less of baseline										Any value 1-1.99 less of baseline in 1-90 days post-index	2	0.125	2	0.0769231	10	0.111111
											Any value 2+ less of baseline in 1-90 days post-index	1	0.0625	3	0.115385	8	0.0888889
Baseline to 6 mo											Baseline to 91-180 days (6 mo)
Total patients (n)											Total patients with baseline Hb and Hb in 91-180 days post-index	14		27		63
Pts receiving transfusions (n)											Patients with transfusions in the 1-180 days post-index	2	0.142857	3	0.111111	19	0.301587
Pts who did not receive transfusions & had a Hb 1g or more above baseline (n)					Take the last hemoglobin value at 3mo or the date closest to the 3 month hemoglobin lab test						No Transfusions in the 1-180 days post-index:
Pts who did not receive transfusions & had a Hb within 1g of baseline (n)					Take the last hemoglobin value at 3mo or the date closest to the 3 month hemoglobin lab test						Last value more than 1+ of baseline	3	0.214286	5	0.185185	17	0.269841
Pts who did not receive transfusions & had a Hb 1 to 2g less than baseline (n)					Take the last hemoglobin value at 3mo or the date closest to the 3 month hemoglobin lab test						Last value within +/- 0.99 of baseline	6	0.428571	15	0.555556	22	0.349206
Pts who did not receive transfusions & had a Hb 2g or more less than baseline (n)											Last value less than 1-1.99 of baseline	2	0.142857	1	0.037037	5	0.0793651
Pts who did not receive transfusions & had a Hb 1 to 2g less than baseline at any point											Last value 2+ less of baseline	1	0.0714286	3	0.111111	0	0
Pts who did not receive transfusions & had a Hb 2g or more less than baseline at any point											Any value 1-1.99 less of baseline in 91-180 days post-index	2	0.142857	1	0.037037	9	0.142857
											Any value 2+ less of baseline 91-180 days post-index	1	0.0714286	5	0.185185	0	0
Baseline to 12 mo											Baseline to 181-365 days (12 mo)
Total patients (n)											Total patients with baseline Hb and Hb in the 181-365 days post-index	10		25		62
Pts receiving transfusions (n)											Patients with transfusions in the 1-365 days post-index	3	0.3	3	0.12	21	0.33871
Pts who did not receive transfusions & had a Hb 1g or more above baseline (n)					Take the last hemoglobin value at 3mo or the date closest to the 3 month hemoglobin lab test						No Transfusions in the 1-365 days post-index
Pts who did not receive transfusions & had a Hb within 1g of baseline (n)					Take the last hemoglobin value at 3mo or the date closest to the 3 month hemoglobin lab test						Last value more than 1+ of baseline	3	0.3	7	0.28	17	0.274194
Pts who did not receive transfusions & had a Hb 1 to 2g less than baseline (n)					Take the last hemoglobin value at 3mo or the date closest to the 3 month hemoglobin lab test						Last value within +/- 0.99 of baseline	2	0.2	12	0.48	21	0.33871
Pts who did not receive transfusions & had a Hb 2g or more less than baseline (n)											Last value less than 1-1.99 of baseline	1	0.1	2	0.08	2	0.0322581
Pts who did not receive transfusions & had a Hb 1 to 2g less than baseline at any point											Last value 2+ less of baseline	1	0.1	1	0.04	1	0.016129
Pts who did not receive transfusions & had a Hb 2g or more less than baseline at any point											Any value 1-1.99 less of baseline in 181-365 days post-index	1	0.1	3	0.12	7	0.112903
											Any value 2+ less of baseline 181-365 days post-index	1	0.1	2	0.08	6	0.0967742

## Sheet: LDH-ARC performance
	RAV-No prior Tx (n=33)		RAV-Prior Tx (n=43)		ECU (n=143)
Baseline	n	%	n	%	n	%
Total patients with LDH available	26		32		89
Pts with LDH<240	6	0.230769	9	0.28125	24	0.269663
Pts with LDH 241 to 360	11	0.423077	11	0.34375	20	0.224719
Pts with LDH 361 to 480	2	0.0769231	5	0.15625	10	0.11236
Pts with LDH 481 or above	7	0.269231	7	0.21875	35	0.393258
Total patients with ARC available	11		19		43
Pts with ARC<120	8	0.727273	11	0.578947	30	0.697674
ARC >= 120	3	0.272727	8	0.421053	13	0.302326
1-90 days post-index (3 mo)
Total patients with LDH available	13		21		67
Pts with LDH<240	7	0.538462	10	0.47619	33	0.492537
Pts with LDH 241 to 360	4	0.307692	3	0.142857	14	0.208955
Pts with LDH 361 to 480	1	0.0769231	2	0.0952381	3	0.0447761
Pts with LDH 481 or above	1	0.0769231	6	0.285714	17	0.253731
Total patients with ARC available	4		5		19
Pts with ARC<120	3	0.75	3	0.6	11	0.578947
ARC >= 120	1	0.25	2	0.4	8	0.421053
91-180 days post-index (6 mo)
Total patients with LDH available	13		20		48
Pts with LDH<240	6	0.461538	7	0.35	19	0.395833
Pts with LDH 241 to 360	5	0.384615	7	0.35	9	0.1875
Pts with LDH 361 to 480	0	0	1	0.05	5	0.104167
Pts with LDH 481 or above	2	0.153846	5	0.25	15	0.3125
Total patients with ARC available	2		7		11
Pts with ARC<120	2	1	5	0.714286	5	0.454545
ARC >= 120	0	0	2	0.285714	6	0.545455
181-365 days post-index (12 mo)
Total patients with LDH available	8		19		49
Pts with LDH<240	4	0.5	8	0.421053	19	0.387755
Pts with LDH 241 to 360	4	0.5	5	0.263158	17	0.346939
Pts with LDH 361 to 480	0	0	1	0.0526316	2	0.0408163
Pts with LDH 481 or above	0	0	5	0.263158	11	0.22449
Total patients with ARC available	3		7		16
Pts with ARC<100	2	0.666667	4	0.571429	9	0.5625
ARC >= 120	1	0.333333	3	0.428571	7	0.4375

## Sheet: Table S2
Table S2: Codes and Variable Definitions
Category	Variable	Code	Code_system	Code_description
Aplastic anemia	Aplastic anemia	D61	ICD-10-CM	Other aplastic anemias and other bone marrow failure syndromes
Aplastic anemia	Aplastic anemia	D61.0	ICD-10-CM	Constitutional aplastic anemia
Aplastic anemia	Aplastic anemia	D61.01	ICD-10-CM	Constitutional (pure) red blood cell aplasia
Aplastic anemia	Aplastic anemia	D61.09	ICD-10-CM	Other constitutional aplastic anemia
Aplastic anemia	Aplastic anemia	D61.1	ICD-10-CM	Drug-induced aplastic anemia
Aplastic anemia	Aplastic anemia	D61.2	ICD-10-CM	Aplastic anemia due to other external agents
Aplastic anemia	Aplastic anemia	D61.3	ICD-10-CM	Idiopathic aplastic anemia
Aplastic anemia	Aplastic anemia	D61.8	ICD-10-CM	Other specified aplastic anemias and other bone marrow failure syndromes
Aplastic anemia	Aplastic anemia	D61.81	ICD-10-CM	Pancytopenia
Aplastic anemia	Aplastic anemia	D61.810	ICD-10-CM	Antineoplastic chemotherapy induced pancytopenia
Aplastic anemia	Aplastic anemia	D61.811	ICD-10-CM	Other drug-induced pancytopenia
Aplastic anemia	Aplastic anemia	D61.818	ICD-10-CM	Other pancytopenia
Aplastic anemia	Aplastic anemia	D61.82	ICD-10-CM	Myelophthisis
Aplastic anemia	Aplastic anemia	D61.89	ICD-10-CM	Other specified aplastic anemias and other bone marrow failure syndromes
Aplastic anemia	Aplastic anemia	D61.9	ICD-10-CM	Aplastic anemia, unspecified
Aplastic anemia	Aplastic anemia	284.0	ICD-9-CM	Constitutional aplastic anemia
Aplastic anemia	Aplastic anemia	284.01	ICD-9-CM	Constitutional red blood cell aplasia
Aplastic anemia	Aplastic anemia	284.09	ICD-9-CM	Other constitutional aplastic anemia
Aplastic anemia	Aplastic anemia	284.89	ICD-9-CM	Other specified aplastic anemias
Aplastic anemia	Aplastic anemia	284.11	ICD-9-CM	Antineoplastic chemotherapy induced pancytopenia
Aplastic anemia	Aplastic anemia	284.12	ICD-9-CM	Other drug-induced pancytopenia
Aplastic anemia	Aplastic anemia	284.19	ICD-9-CM	Other pancytopenia
Aplastic anemia	Aplastic anemia	284.1	ICD-9-CM	Pancytopenia
Aplastic anemia	Aplastic anemia	284.2	ICD-9-CM	Myelophthisis
Aplastic anemia	Aplastic anemia	284.8	ICD-9-CM	Other specified aplastic anemias
Aplastic anemia	Aplastic anemia	284.9	ICD-9-CM	Aplastic anemia, unspecified
Aplastic anemia	Aplastic anemia	284	ICD-9-CM	Aplastic anemia and other bone marrow failure syndromes
Breakthrough hemolysis	Abdominal pain	R10	ICD-10-CM	Abdominal and pelvic pain
Breakthrough hemolysis	Abdominal pain	R10.0	ICD-10-CM	Acute abdomen
Breakthrough hemolysis	Abdominal pain	R10.1	ICD-10-CM	Pain localized to upper abdomen
Breakthrough hemolysis	Abdominal pain	R10.10	ICD-10-CM	Upper abdominal pain, unspecified
Breakthrough hemolysis	Abdominal pain	R10.11	ICD-10-CM	Right upper quadrant pain
Breakthrough hemolysis	Abdominal pain	R10.12	ICD-10-CM	Left upper quadrant pain
Breakthrough hemolysis	Abdominal pain	R10.13	ICD-10-CM	Epigastric pain
Breakthrough hemolysis	Abdominal pain	R10.2	ICD-10-CM	Pelvic and perineal pain
Breakthrough hemolysis	Abdominal pain	R10.3	ICD-10-CM	Pain localized to other parts of lower abdomen
Breakthrough hemolysis	Abdominal pain	R10.30	ICD-10-CM	Lower abdominal pain, unspecified
Breakthrough hemolysis	Abdominal pain	R10.31	ICD-10-CM	Right lower quadrant pain
Breakthrough hemolysis	Abdominal pain	R10.32	ICD-10-CM	Left lower quadrant pain
Breakthrough hemolysis	Abdominal pain	R10.33	ICD-10-CM	Periumbilical pain
Breakthrough hemolysis	Abdominal pain	R10.8	ICD-10-CM	Other abdominal pain
Breakthrough hemolysis	Abdominal pain	R10.81	ICD-10-CM	Abdominal tenderness
Breakthrough hemolysis	Abdominal pain	R10.811	ICD-10-CM	Right upper quadrant abdominal tenderness
Breakthrough hemolysis	Abdominal pain	R10.812	ICD-10-CM	Left upper quadrant abdominal tenderness
Breakthrough hemolysis	Abdominal pain	R10.813	ICD-10-CM	Right lower quadrant abdominal tenderness
Breakthrough hemolysis	Abdominal pain	R10.814	ICD-10-CM	Left lower quadrant abdominal tenderness
Breakthrough hemolysis	Abdominal pain	R10.815	ICD-10-CM	Periumbilic abdominal tenderness
Breakthrough hemolysis	Abdominal pain	R10.816	ICD-10-CM	Epigastric abdominal tenderness
Breakthrough hemolysis	Abdominal pain	R10.817	ICD-10-CM	Generalized abdominal tenderness
Breakthrough hemolysis	Abdominal pain	R10.819	ICD-10-CM	Abdominal tenderness, unspecified site
Breakthrough hemolysis	Abdominal pain	R10.82	ICD-10-CM	Rebound abdominal tenderness
Breakthrough hemolysis	Abdominal pain	R10.821	ICD-10-CM	Right upper quadrant rebound abdominal tenderness
Breakthrough hemolysis	Abdominal pain	R10.822	ICD-10-CM	Left upper quadrant rebound abdominal tenderness
Breakthrough hemolysis	Abdominal pain	R10.823	ICD-10-CM	Right lower quadrant rebound abdominal tenderness
Breakthrough hemolysis	Abdominal pain	R10.824	ICD-10-CM	Left lower quadrant rebound abdominal tenderness
Breakthrough hemolysis	Abdominal pain	R10.825	ICD-10-CM	Periumbilic rebound abdominal tenderness
Breakthrough hemolysis	Abdominal pain	R10.826	ICD-10-CM	Epigastric rebound abdominal tenderness
Breakthrough hemolysis	Abdominal pain	R10.827	ICD-10-CM	Generalized rebound abdominal tenderness
Breakthrough hemolysis	Abdominal pain	R10.829	ICD-10-CM	Rebound abdominal tenderness, unspecified site
Breakthrough hemolysis	Abdominal pain	R10.83	ICD-10-CM	Colic
Breakthrough hemolysis	Abdominal pain	R10.84	ICD-10-CM	Generalized abdominal pain
Breakthrough hemolysis	Abdominal pain	R10.9	ICD-10-CM	Unspecified abdominal pain
Breakthrough hemolysis	Abdominal pain	789.01	ICD-9-CM	Abdominal pain, right upper quadrant
Breakthrough hemolysis	Abdominal pain	789.02	ICD-9-CM	Abdominal pain, left upper quadrant
Breakthrough hemolysis	Abdominal pain	789.06	ICD-9-CM	Abdominal pain, epigastric
Breakthrough hemolysis	Abdominal pain	789.0	ICD-9-CM	Abdominal pain
Breakthrough hemolysis	Abdominal pain	608.9	ICD-9-CM	Unspecified disorder of male genital organs
Breakthrough hemolysis	Abdominal pain	625.9	ICD-9-CM	Unspecified symptom associated with female genital organs
Breakthrough hemolysis	Abdominal pain	789.09	ICD-9-CM	Abdominal pain, other specified site
Breakthrough hemolysis	Abdominal pain	789.03	ICD-9-CM	Abdominal pain, right lower quadrant
Breakthrough hemolysis	Abdominal pain	789.04	ICD-9-CM	Abdominal pain, left lower quadrant
Breakthrough hemolysis	Abdominal pain	789.05	ICD-9-CM	Abdominal pain, periumbilic
Breakthrough hemolysis	Abdominal pain	789.61	ICD-9-CM	Abdominal tenderness, right upper quadrant
Breakthrough hemolysis	Abdominal pain	789.62	ICD-9-CM	Abdominal tenderness, left upper quadrant
Breakthrough hemolysis	Abdominal pain	789.63	ICD-9-CM	Abdominal tenderness, right lower quadrant
Breakthrough hemolysis	Abdominal pain	789.64	ICD-9-CM	Abdominal tenderness, left lower quadrant
Breakthrough hemolysis	Abdominal pain	789.65	ICD-9-CM	Abdominal tenderness, periumbilic
Breakthrough hemolysis	Abdominal pain	789.66	ICD-9-CM	Abdominal tenderness, epigastric
Breakthrough hemolysis	Abdominal pain	789.67	ICD-9-CM	Abdominal tenderness, generalized
Breakthrough hemolysis	Abdominal pain	789.60	ICD-9-CM	Abdominal tenderness, unspecified site
Breakthrough hemolysis	Abdominal pain	789.69	ICD-9-CM	Abdominal tenderness, other specified site
Breakthrough hemolysis	Abdominal pain	789.6	ICD-9-CM	Abdominal tenderness
Breakthrough hemolysis	Abdominal pain	789.7	ICD-9-CM	Colic
Breakthrough hemolysis	Abdominal pain	789.07	ICD-9-CM	Abdominal pain, generalized
Breakthrough hemolysis	Abdominal pain	789.00	ICD-9-CM	Abdominal pain, unspecified site
Breakthrough hemolysis	Abdominal pain	608	ICD-9-CM	Other disorders of male genital organs
Breakthrough hemolysis	Abdominal pain	625	ICD-9-CM	Pain and other symptoms associated with female genital organs
Breakthrough hemolysis	Anemia	718-7	LOINC	Hemoglobin [Mass/volume] in Blood
Breakthrough hemolysis	Anemia	20509-6	LOINC	Hemoglobin [Mass/volume] in Blood by calculation
Breakthrough hemolysis	Anemia	55782-7	LOINC	Hemoglobin [Mass/volume] in Blood by Oximetry
Breakthrough hemolysis	Anemia	14775-1	LOINC	Hemoglobin [Mass/volume] in Arterial blood by Oximetry
Breakthrough hemolysis	Anemia	30313-1	LOINC	Hemoglobin [Mass/volume] in Arterial blood
Breakthrough hemolysis	Anemia	30352-9	LOINC	Hemoglobin [Mass/volume] in Capillary blood
Breakthrough hemolysis	Anemia	30351-1	LOINC	Hemoglobin [Mass/volume] in Mixed venous blood
Breakthrough hemolysis	Anemia	30350-3	LOINC	Hemoglobin [Mass/volume] in Venous blood
Breakthrough hemolysis	Anemia	76769-9	LOINC	Hemoglobin [Mass/volume] in Venous blood by Oximetry
Breakthrough hemolysis	AST	30239-8	LOINC	Aspartate aminotransferase [Enzymatic activity/volume] in Serum or Plasma by With P-5'-P
Breakthrough hemolysis	AST	1920-8	LOINC	Aspartate aminotransferase [Enzymatic activity/volume] in Serum or Plasma
Breakthrough hemolysis	Dysphagia	R13.1	ICD-10-CM	Dysphagia
Breakthrough hemolysis	Dysphagia	R13.10	ICD-10-CM	Dysphagia, unspecified
Breakthrough hemolysis	Dysphagia	R13.11	ICD-10-CM	Dysphagia, oral phase
Breakthrough hemolysis	Dysphagia	R13.12	ICD-10-CM	Dysphagia, oropharyngeal phase
Breakthrough hemolysis	Dysphagia	R13.13	ICD-10-CM	Dysphagia, pharyngeal phase
Breakthrough hemolysis	Dysphagia	R13.14	ICD-10-CM	Dysphagia, pharyngoesophageal phase
Breakthrough hemolysis	Dysphagia	R13.19	ICD-10-CM	Other dysphagia
Breakthrough hemolysis	Dysphagia	787.20	ICD-9-CM	Dysphagia, unspecified
Breakthrough hemolysis	Dysphagia	V41.6	ICD-9-CM	Problems with swallowing and mastication
Breakthrough hemolysis	Dysphagia	787.21	ICD-9-CM	Dysphagia, oral phase
Breakthrough hemolysis	Dysphagia	787.22	ICD-9-CM	Dysphagia, oropharyngeal phase
Breakthrough hemolysis	Dysphagia	787.23	ICD-9-CM	Dysphagia, pharyngeal phase
Breakthrough hemolysis	Dysphagia	787.24	ICD-9-CM	Dysphagia, pharyngoesophageal phase
Breakthrough hemolysis	Dysphagia	787.29	ICD-9-CM	Other dysphagia
Breakthrough hemolysis	Dysphagia	787.2	ICD-9-CM	Dysphagia
Breakthrough hemolysis	Dyspnea	R06.0	ICD-10-CM	Dyspnea
Breakthrough hemolysis	Dyspnea	R06.00	ICD-10-CM	Dyspnea, unspecified
Breakthrough hemolysis	Dyspnea	R06.01	ICD-10-CM	Orthopnea
Breakthrough hemolysis	Dyspnea	R06.02	ICD-10-CM	Shortness of breath
Breakthrough hemolysis	Dyspnea	R06.03	ICD-10-CM	Acute respiratory distress
Breakthrough hemolysis	Dyspnea	R06.09	ICD-10-CM	Other forms of dyspnea
Breakthrough hemolysis	Dyspnea	786.02	ICD-9-CM	Orthopnea
Breakthrough hemolysis	Dyspnea	786.05	ICD-9-CM	Shortness of breath
Breakthrough hemolysis	Dyspnea	786.09	ICD-9-CM	Other respiratory abnormalities
Breakthrough hemolysis	Dyspnea	786.0	ICD-9-CM	Dyspnea and respiratory abnormalities
Breakthrough hemolysis	Erectile dysfunction	N52	ICD-10-CM	Male erectile dysfunction
Breakthrough hemolysis	Erectile dysfunction	N52.0	ICD-10-CM	Vasculogenic erectile dysfunction
Breakthrough hemolysis	Erectile dysfunction	N52.01	ICD-10-CM	Erectile dysfunction due to arterial insufficiency
Breakthrough hemolysis	Erectile dysfunction	N52.02	ICD-10-CM	Corporo-venous occlusive erectile dysfunction
Breakthrough hemolysis	Erectile dysfunction	N52.03	ICD-10-CM	Combined arterial insufficiency and corporo-venous occlusive erectile dysfunction
Breakthrough hemolysis	Erectile dysfunction	N52.1	ICD-10-CM	Erectile dysfunction due to diseases classified elsewhere
Breakthrough hemolysis	Erectile dysfunction	N52.2	ICD-10-CM	Drug-induced erectile dysfunction
Breakthrough hemolysis	Erectile dysfunction	N52.3	ICD-10-CM	Postprocedural erectile dysfunction
Breakthrough hemolysis	Erectile dysfunction	N52.31	ICD-10-CM	Erectile dysfunction following radical prostatectomy
Breakthrough hemolysis	Erectile dysfunction	N52.32	ICD-10-CM	Erectile dysfunction following radical cystectomy
Breakthrough hemolysis	Erectile dysfunction	N52.33	ICD-10-CM	Erectile dysfunction following urethral surgery
Breakthrough hemolysis	Erectile dysfunction	N52.34	ICD-10-CM	Erectile dysfunction following simple prostatectomy
Breakthrough hemolysis	Erectile dysfunction	N52.35	ICD-10-CM	Erectile dysfunction following radiation therapy
Breakthrough hemolysis	Erectile dysfunction	N52.36	ICD-10-CM	Erectile dysfunction following interstitial seed therapy
Breakthrough hemolysis	Erectile dysfunction	N52.37	ICD-10-CM	Erectile dysfunction following prostate ablative therapy
Breakthrough hemolysis	Erectile dysfunction	N52.39	ICD-10-CM	Other and unspecified postprocedural erectile dysfunction
Breakthrough hemolysis	Erectile dysfunction	N52.8	ICD-10-CM	Other male erectile dysfunction
Breakthrough hemolysis	Erectile dysfunction	N52.9	ICD-10-CM	Male erectile dysfunction, unspecified
Breakthrough hemolysis	Erectile dysfunction	607.84	ICD-9-CM	Impotence of organic origin
Breakthrough hemolysis	Fatigue	R53.83	ICD-10-CM	Other fatigue
Breakthrough hemolysis	Fatigue	R53.82	ICD-10-CM	Chronic fatigue, unspecified
Breakthrough hemolysis	Fatigue	780.7	ICD-9-CM	Malaise and fatigue
Breakthrough hemolysis	Fatigue	780.79	ICD-9-CM	Other malaise and fatigue
Breakthrough hemolysis	Fatigue	780.71	ICD-9-CM	Chronic fatigue syndrome
Breakthrough hemolysis	Hemoglobinuria	R82.3	ICD-10-CM	Hemoglobinuria
Breakthrough hemolysis	Hemoglobinuria	791.2	ICD-9-CM	Hemoglobinuria
Breakthrough hemolysis	Hemoglobinuria	725-2	LOINC	Hemoglobin [Presence] in Urine
Breakthrough hemolysis	Hemoglobinuria	49137-3	LOINC	Hemoglobin [Mass/volume] in Urine by Test strip
Breakthrough hemolysis	Hemoglobinuria	50559-4	LOINC	Hemoglobin [Mass/volume] in Urine by Automated test strip
Breakthrough hemolysis	Hemoglobinuria	57751-0	LOINC	Hemoglobin [Presence] in Urine by Automated test strip
Breakthrough hemolysis	Hemoglobinuria	5794-3	LOINC	Hemoglobin [Presence] in Urine by Test strip
Breakthrough hemolysis	Hemoglobinuria	726-0	LOINC	Hemoglobin [Mass/volume] in Urine
Breakthrough hemolysis	Major adverse vascular event	411.1	ICD-9-CM	Intermediate coronary syndrome
Breakthrough hemolysis	Major adverse vascular event	437.7	ICD-9-CM	Transient global amnesia
Breakthrough hemolysis	Major adverse vascular event	433.01	ICD-9-CM	Occlusion and stenosis of basilar artery with cerebral infarction
Breakthrough hemolysis	Major adverse vascular event	433.11	ICD-9-CM	Occlusion and stenosis of carotid artery with cerebral infarction
Breakthrough hemolysis	Major adverse vascular event	433.21	ICD-9-CM	Occlusion and stenosis of vertebral artery with cerebral infarction
Breakthrough hemolysis	Major adverse vascular event	433.31	ICD-9-CM	Occlusion and stenosis of multiple and bilateral precerebral arteries with cerebral infarction
Breakthrough hemolysis	Major adverse vascular event	433.81	ICD-9-CM	Occlusion and stenosis of other specified precerebral artery with cerebral infarction
Breakthrough hemolysis	Major adverse vascular event	433.91	ICD-9-CM	Occlusion and stenosis of unspecified precerebral artery with cerebral infarction
Breakthrough hemolysis	Major adverse vascular event	452	ICD-9-CM	Portal vein thrombosis
Breakthrough hemolysis	Major adverse vascular event	444	ICD-9-CM	Arterial embolism and thrombosis
Breakthrough hemolysis	Major adverse vascular event	444.0	ICD-9-CM	Embolism and thrombosis of abdominal aorta
Breakthrough hemolysis	Major adverse vascular event	444.01	ICD-9-CM	Saddle embolus of abdominal aorta
Breakthrough hemolysis	Major adverse vascular event	444.09	ICD-9-CM	Other arterial embolism and thrombosis of abdominal aorta
Breakthrough hemolysis	Major adverse vascular event	444.1	ICD-9-CM	Embolism and thrombosis of thoracic aorta
Breakthrough hemolysis	Major adverse vascular event	444.2	ICD-9-CM	Embolism and thrombosis of arteries of the extremities
Breakthrough hemolysis	Major adverse vascular event	444.21	ICD-9-CM	Arterial embolism and thrombosis of upper extremity
Breakthrough hemolysis	Major adverse vascular event	444.22	ICD-9-CM	Arterial embolism and thrombosis of lower extremity
Breakthrough hemolysis	Major adverse vascular event	444.8	ICD-9-CM	Embolism and thrombosis of other specified artery
Breakthrough hemolysis	Major adverse vascular event	444.81	ICD-9-CM	Embolism and thrombosis of iliac artery
Breakthrough hemolysis	Major adverse vascular event	444.89	ICD-9-CM	Embolism and thrombosis of other specified artery
Breakthrough hemolysis	Major adverse vascular event	444.9	ICD-9-CM	Embolism and thrombosis of unspecified artery
Breakthrough hemolysis	Major adverse vascular event	410	ICD-9-CM	Acute myocardial infarction
Breakthrough hemolysis	Major adverse vascular event	410.0	ICD-9-CM	Acute myocardial infarction, of anterolateral wall
Breakthrough hemolysis	Major adverse vascular event	410.00	ICD-9-CM	Acute myocardial infarction of anterolateral wall, episode of care unspecified
Breakthrough hemolysis	Major adverse vascular event	410.01	ICD-9-CM	Acute myocardial infarction of anterolateral wall, initial episode of care
Breakthrough hemolysis	Major adverse vascular event	410.02	ICD-9-CM	Acute myocardial infarction of anterolateral wall, subsequent episode of care
Breakthrough hemolysis	Major adverse vascular event	410.1	ICD-9-CM	Acute myocardial infarction, of other anterior wall
Breakthrough hemolysis	Major adverse vascular event	410.10	ICD-9-CM	Acute myocardial infarction of other anterior wall, episode of care unspecified
Breakthrough hemolysis	Major adverse vascular event	410.11	ICD-9-CM	Acute myocardial infarction of other anterior wall, initial episode of care
Breakthrough hemolysis	Major adverse vascular event	410.12	ICD-9-CM	Acute myocardial infarction of other anterior wall, subsequent episode of care
Breakthrough hemolysis	Major adverse vascular event	410.2	ICD-9-CM	Acute myocardial infarction, of inferolateral wall
Breakthrough hemolysis	Major adverse vascular event	410.20	ICD-9-CM	Acute myocardial infarction of inferolateral wall, episode of care unspecified
Breakthrough hemolysis	Major adverse vascular event	410.21	ICD-9-CM	Acute myocardial infarction of inferolateral wall, initial episode of care
Breakthrough hemolysis	Major adverse vascular event	410.22	ICD-9-CM	Acute myocardial infarction of inferolateral wall, subsequent episode of care
Breakthrough hemolysis	Major adverse vascular event	410.3	ICD-9-CM	Acute myocardial infarction, of inferoposterior wall
Breakthrough hemolysis	Major adverse vascular event	410.30	ICD-9-CM	Acute myocardial infarction of inferoposterior wall, episode of care unspecified
Breakthrough hemolysis	Major adverse vascular event	410.31	ICD-9-CM	Acute myocardial infarction of inferoposterior wall, initial episode of care
Breakthrough hemolysis	Major adverse vascular event	410.32	ICD-9-CM	Acute myocardial infarction of inferoposterior wall, subsequent episode of care
Breakthrough hemolysis	Major adverse vascular event	410.4	ICD-9-CM	Acute myocardial infarction, of other inferior wall
Breakthrough hemolysis	Major adverse vascular event	410.40	ICD-9-CM	Acute myocardial infarction of other inferior wall, episode of care unspecified
Breakthrough hemolysis	Major adverse vascular event	410.41	ICD-9-CM	Acute myocardial infarction of other inferior wall, initial episode of care
Breakthrough hemolysis	Major adverse vascular event	410.42	ICD-9-CM	Acute myocardial infarction of other inferior wall, subsequent episode of care
Breakthrough hemolysis	Major adverse vascular event	410.5	ICD-9-CM	Acute myocardial infarction, of other lateral wall
Breakthrough hemolysis	Major adverse vascular event	410.50	ICD-9-CM	Acute myocardial infarction of other lateral wall, episode of care unspecified
Breakthrough hemolysis	Major adverse vascular event	410.51	ICD-9-CM	Acute myocardial infarction of other lateral wall, initial episode of care
Breakthrough hemolysis	Major adverse vascular event	410.52	ICD-9-CM	Acute myocardial infarction of other lateral wall, subsequent episode of care
Breakthrough hemolysis	Major adverse vascular event	410.6	ICD-9-CM	Acute myocardial infarction, true posterior wall infarction
Breakthrough hemolysis	Major adverse vascular event	410.60	ICD-9-CM	True posterior wall infarction, episode of care unspecified
Breakthrough hemolysis	Major adverse vascular event	410.61	ICD-9-CM	True posterior wall infarction, initial episode of care
Breakthrough hemolysis	Major adverse vascular event	410.62	ICD-9-CM	True posterior wall infarction, subsequent episode of care
Breakthrough hemolysis	Major adverse vascular event	410.7	ICD-9-CM	Acute myocardial infarction, subendocardial infarction
Breakthrough hemolysis	Major adverse vascular event	410.70	ICD-9-CM	Subendocardial infarction, episode of care unspecified
Breakthrough hemolysis	Major adverse vascular event	410.71	ICD-9-CM	Subendocardial infarction, initial episode of care
Breakthrough hemolysis	Major adverse vascular event	410.72	ICD-9-CM	Subendocardial infarction, subsequent episode of care
Breakthrough hemolysis	Major adverse vascular event	410.8	ICD-9-CM	Acute myocardial infarction, of other specified sites
Breakthrough hemolysis	Major adverse vascular event	410.80	ICD-9-CM	Acute myocardial infarction of other specified sites, episode of care unspecified
Breakthrough hemolysis	Major adverse vascular event	410.81	ICD-9-CM	Acute myocardial infarction of other specified sites, initial episode of care
Breakthrough hemolysis	Major adverse vascular event	410.82	ICD-9-CM	Acute myocardial infarction of other specified sites, subsequent episode of care
Breakthrough hemolysis	Major adverse vascular event	410.9	ICD-9-CM	Acute myocardial infarction, unspecified site
Breakthrough hemolysis	Major adverse vascular event	410.90	ICD-9-CM	Acute myocardial infarction of unspecified site, episode of care unspecified
Breakthrough hemolysis	Major adverse vascular event	410.91	ICD-9-CM	Acute myocardial infarction of unspecified site, initial episode of care
Breakthrough hemolysis	Major adverse vascular event	410.92	ICD-9-CM	Acute myocardial infarction of unspecified site, subsequent episode of care
Breakthrough hemolysis	Major adverse vascular event	429.7	ICD-9-CM	Certain sequelae of myocardial infarction, not elsewhere classified
Breakthrough hemolysis	Major adverse vascular event	429.71	ICD-9-CM	Acquired cardiac septal defect
Breakthrough hemolysis	Major adverse vascular event	429.79	ICD-9-CM	Certain sequelae of myocardial infarction, not elsewhere classified, other
Breakthrough hemolysis	Major adverse vascular event	435	ICD-9-CM	Transient cerebral ischemia
Breakthrough hemolysis	Major adverse vascular event	435.0	ICD-9-CM	Basilar artery syndrome
Breakthrough hemolysis	Major adverse vascular event	435.1	ICD-9-CM	Vertebral artery syndrome
Breakthrough hemolysis	Major adverse vascular event	435.2	ICD-9-CM	Subclavian steal syndrome
Breakthrough hemolysis	Major adverse vascular event	435.3	ICD-9-CM	Vertebrobasilar artery syndrome
Breakthrough hemolysis	Major adverse vascular event	435.8	ICD-9-CM	Other specified transient cerebral ischemias
Breakthrough hemolysis	Major adverse vascular event	435.9	ICD-9-CM	Unspecified transient cerebral ischemia
Breakthrough hemolysis	Major adverse vascular event	453	ICD-9-CM	Other venous embolism and thrombosis
Breakthrough hemolysis	Major adverse vascular event	453.0	ICD-9-CM	Budd-chiari syndrome
Breakthrough hemolysis	Major adverse vascular event	453.1	ICD-9-CM	Thrombophlebitis migrans
Breakthrough hemolysis	Major adverse vascular event	453.2	ICD-9-CM	Other venous embolism and thrombosis of inferior vena cava
Breakthrough hemolysis	Major adverse vascular event	453.3	ICD-9-CM	Other venous embolism and thrombosis of renal vein
Breakthrough hemolysis	Major adverse vascular event	453.4	ICD-9-CM	Acute venous embolism and thrombosis of deep vessels of lower extremity
Breakthrough hemolysis	Major adverse vascular event	453.40	ICD-9-CM	Acute venous embolism and thrombosis of unspecified deep vessels of lower extremity
Breakthrough hemolysis	Major adverse vascular event	453.41	ICD-9-CM	Acute venous embolism and thrombosis of deep vessels of proximal lower extremity
Breakthrough hemolysis	Major adverse vascular event	453.42	ICD-9-CM	Acute venous embolism and thrombosis of deep vessels of distal lower extremity
Breakthrough hemolysis	Major adverse vascular event	453.5	ICD-9-CM	Chronic venous embolism and thrombosis of deep vessels of lower extremity
Breakthrough hemolysis	Major adverse vascular event	453.50	ICD-9-CM	Chronic venous embolism and thrombosis of unspecified deep vessels of lower extremity
Breakthrough hemolysis	Major adverse vascular event	453.51	ICD-9-CM	Chronic venous embolism and thrombosis of deep vessels of proximal lower extremity
Breakthrough hemolysis	Major adverse vascular event	453.52	ICD-9-CM	Chronic venous embolism and thrombosis of deep vessels of distal lower extremity
Breakthrough hemolysis	Major adverse vascular event	453.6	ICD-9-CM	Venous embolism and thrombosis of superficial vessels of lower extremity
Breakthrough hemolysis	Major adverse vascular event	453.7	ICD-9-CM	Chronic venous embolism and thrombosis of other specified vessels
Breakthrough hemolysis	Major adverse vascular event	453.71	ICD-9-CM	Chronic venous embolism and thrombosis of superficial veins of upper extremity
Breakthrough hemolysis	Major adverse vascular event	453.72	ICD-9-CM	Chronic venous embolism and thrombosis of deep veins of upper extremity
Breakthrough hemolysis	Major adverse vascular event	453.73	ICD-9-CM	Chronic venous embolism and thrombosis of upper extremity, unspecified
Breakthrough hemolysis	Major adverse vascular event	453.74	ICD-9-CM	Chronic venous embolism and thrombosis of axillary veins
Breakthrough hemolysis	Major adverse vascular event	453.75	ICD-9-CM	Chronic venous embolism and thrombosis of subclavian veins
Breakthrough hemolysis	Major adverse vascular event	453.76	ICD-9-CM	Chronic venous embolism and thrombosis of internal jugular veins
Breakthrough hemolysis	Major adverse vascular event	453.77	ICD-9-CM	Chronic venous embolism and thrombosis of other thoracic veins
Breakthrough hemolysis	Major adverse vascular event	453.79	ICD-9-CM	Chronic venous embolism and thrombosis of other specified veins
Breakthrough hemolysis	Major adverse vascular event	453.8	ICD-9-CM	Acute venous embolism and thrombosis of other specified veins
Breakthrough hemolysis	Major adverse vascular event	453.81	ICD-9-CM	Acute venous embolism and thrombosis of superficial veins of upper extremity
Breakthrough hemolysis	Major adverse vascular event	453.82	ICD-9-CM	Acute venous embolism and thrombosis of deep veins of upper extremity
Breakthrough hemolysis	Major adverse vascular event	453.83	ICD-9-CM	Acute venous embolism and thrombosis of upper extremity, unspecified
Breakthrough hemolysis	Major adverse vascular event	453.84	ICD-9-CM	Acute venous embolism and thrombosis of axillary veins
Breakthrough hemolysis	Major adverse vascular event	453.85	ICD-9-CM	Acute venous embolism and thrombosis of subclavian veins
Breakthrough hemolysis	Major adverse vascular event	453.86	ICD-9-CM	Acute venous embolism and thrombosis of internal jugular veins
Breakthrough hemolysis	Major adverse vascular event	453.87	ICD-9-CM	Acute venous embolism and thrombosis of other thoracic veins
Breakthrough hemolysis	Major adverse vascular event	453.89	ICD-9-CM	Acute venous embolism and thrombosis of other specified veins
Breakthrough hemolysis	Major adverse vascular event	453.9	ICD-9-CM	Other venous embolism and thrombosis of unspecified site
Breakthrough hemolysis	Major adverse vascular event	I20.0	ICD-10-CM	Unstable angina
Breakthrough hemolysis	Major adverse vascular event	I81	ICD-10-CM	Portal vein thrombosis
Breakthrough hemolysis	Major adverse vascular event	G45	ICD-10-CM	Transient cerebral ischemic attacks and related syndromes
Breakthrough hemolysis	Major adverse vascular event	G45.0	ICD-10-CM	Vertebro-basilar artery syndrome
Breakthrough hemolysis	Major adverse vascular event	G45.1	ICD-10-CM	Carotid artery syndrome (hemispheric)
Breakthrough hemolysis	Major adverse vascular event	G45.2	ICD-10-CM	Multiple and bilateral precerebral artery syndromes
Breakthrough hemolysis	Major adverse vascular event	G45.3	ICD-10-CM	Amaurosis fugax
Breakthrough hemolysis	Major adverse vascular event	G45.4	ICD-10-CM	Transient global amnesia
Breakthrough hemolysis	Major adverse vascular event	G45.8	ICD-10-CM	Other transient cerebral ischemic attacks and related syndromes
Breakthrough hemolysis	Major adverse vascular event	G45.9	ICD-10-CM	Transient cerebral ischemic attack, unspecified
Breakthrough hemolysis	Major adverse vascular event	I63	ICD-10-CM	Cerebral infarction
Breakthrough hemolysis	Major adverse vascular event	I63.0	ICD-10-CM	Cerebral infarction due to thrombosis of precerebral arteries
Breakthrough hemolysis	Major adverse vascular event	I63.00	ICD-10-CM	Cerebral infarction due to thrombosis of unspecified precerebral artery
Breakthrough hemolysis	Major adverse vascular event	I63.01	ICD-10-CM	Cerebral infarction due to thrombosis of vertebral artery
Breakthrough hemolysis	Major adverse vascular event	I63.011	ICD-10-CM	Cerebral infarction due to thrombosis of right vertebral artery
Breakthrough hemolysis	Major adverse vascular event	I63.012	ICD-10-CM	Cerebral infarction due to thrombosis of left vertebral artery
Breakthrough hemolysis	Major adverse vascular event	I63.013	ICD-10-CM	Cerebral infarction due to thrombosis of bilateral vertebral arteries
Breakthrough hemolysis	Major adverse vascular event	I63.019	ICD-10-CM	Cerebral infarction due to thrombosis of unspecified vertebral artery
Breakthrough hemolysis	Major adverse vascular event	I63.02	ICD-10-CM	Cerebral infarction due to thrombosis of basilar artery
Breakthrough hemolysis	Major adverse vascular event	I63.03	ICD-10-CM	Cerebral infarction due to thrombosis of carotid artery
Breakthrough hemolysis	Major adverse vascular event	I63.031	ICD-10-CM	Cerebral infarction due to thrombosis of right carotid artery
Breakthrough hemolysis	Major adverse vascular event	I63.032	ICD-10-CM	Cerebral infarction due to thrombosis of left carotid artery
Breakthrough hemolysis	Major adverse vascular event	I63.033	ICD-10-CM	Cerebral infarction due to thrombosis of bilateral carotid arteries
Breakthrough hemolysis	Major adverse vascular event	I63.039	ICD-10-CM	Cerebral infarction due to thrombosis of unspecified carotid artery
Breakthrough hemolysis	Major adverse vascular event	I63.09	ICD-10-CM	Cerebral infarction due to thrombosis of other precerebral artery
Breakthrough hemolysis	Major adverse vascular event	I63.1	ICD-10-CM	Cerebral infarction due to embolism of precerebral arteries
Breakthrough hemolysis	Major adverse vascular event	I63.10	ICD-10-CM	Cerebral infarction due to embolism of unspecified precerebral artery
Breakthrough hemolysis	Major adverse vascular event	I63.11	ICD-10-CM	Cerebral infarction due to embolism of vertebral artery
Breakthrough hemolysis	Major adverse vascular event	I63.111	ICD-10-CM	Cerebral infarction due to embolism of right vertebral artery
Breakthrough hemolysis	Major adverse vascular event	I63.112	ICD-10-CM	Cerebral infarction due to embolism of left vertebral artery
Breakthrough hemolysis	Major adverse vascular event	I63.113	ICD-10-CM	Cerebral infarction due to embolism of bilateral vertebral arteries
Breakthrough hemolysis	Major adverse vascular event	I63.119	ICD-10-CM	Cerebral infarction due to embolism of unspecified vertebral artery
Breakthrough hemolysis	Major adverse vascular event	I63.12	ICD-10-CM	Cerebral infarction due to embolism of basilar artery
Breakthrough hemolysis	Major adverse vascular event	I63.13	ICD-10-CM	Cerebral infarction due to embolism of carotid artery
Breakthrough hemolysis	Major adverse vascular event	I63.131	ICD-10-CM	Cerebral infarction due to embolism of right carotid artery
Breakthrough hemolysis	Major adverse vascular event	I63.132	ICD-10-CM	Cerebral infarction due to embolism of left carotid artery
Breakthrough hemolysis	Major adverse vascular event	I63.133	ICD-10-CM	Cerebral infarction due to embolism of bilateral carotid arteries
Breakthrough hemolysis	Major adverse vascular event	I63.139	ICD-10-CM	Cerebral infarction due to embolism of unspecified carotid artery
Breakthrough hemolysis	Major adverse vascular event	I63.19	ICD-10-CM	Cerebral infarction due to embolism of other precerebral artery
Breakthrough hemolysis	Major adverse vascular event	I63.2	ICD-10-CM	Cerebral infarction due to unspecified occlusion or stenosis of precerebral arteries
Breakthrough hemolysis	Major adverse vascular event	I63.20	ICD-10-CM	Cerebral infarction due to unspecified occlusion or stenosis of unspecified precerebral arteries
Breakthrough hemolysis	Major adverse vascular event	I63.21	ICD-10-CM	Cerebral infarction due to unspecified occlusion or stenosis of vertebral arteries
Breakthrough hemolysis	Major adverse vascular event	I63.211	ICD-10-CM	Cerebral infarction due to unspecified occlusion or stenosis of right vertebral artery
Breakthrough hemolysis	Major adverse vascular event	I63.212	ICD-10-CM	Cerebral infarction due to unspecified occlusion or stenosis of left vertebral artery
Breakthrough hemolysis	Major adverse vascular event	I63.213	ICD-10-CM	Cerebral infarction due to unspecified occlusion or stenosis of bilateral vertebral arteries
Breakthrough hemolysis	Major adverse vascular event	I63.219	ICD-10-CM	Cerebral infarction due to unspecified occlusion or stenosis of unspecified vertebral artery
Breakthrough hemolysis	Major adverse vascular event	I63.22	ICD-10-CM	Cerebral infarction due to unspecified occlusion or stenosis of basilar artery
Breakthrough hemolysis	Major adverse vascular event	I63.23	ICD-10-CM	Cerebral infarction due to unspecified occlusion or stenosis of carotid arteries
Breakthrough hemolysis	Major adverse vascular event	I63.231	ICD-10-CM	Cerebral infarction due to unspecified occlusion or stenosis of right carotid arteries
Breakthrough hemolysis	Major adverse vascular event	I63.232	ICD-10-CM	Cerebral infarction due to unspecified occlusion or stenosis of left carotid arteries
Breakthrough hemolysis	Major adverse vascular event	I63.233	ICD-10-CM	Cerebral infarction due to unspecified occlusion or stenosis of bilateral carotid arteries
Breakthrough hemolysis	Major adverse vascular event	I63.239	ICD-10-CM	Cerebral infarction due to unspecified occlusion or stenosis of unspecified carotid artery
Breakthrough hemolysis	Major adverse vascular event	I63.29	ICD-10-CM	Cerebral infarction due to unspecified occlusion or stenosis of other precerebral arteries
Breakthrough hemolysis	Major adverse vascular event	I63.3	ICD-10-CM	Cerebral infarction due to thrombosis of cerebral arteries
Breakthrough hemolysis	Major adverse vascular event	I63.30	ICD-10-CM	Cerebral infarction due to thrombosis of unspecified cerebral artery
Breakthrough hemolysis	Major adverse vascular event	I63.31	ICD-10-CM	Cerebral infarction due to thrombosis of middle cerebral artery
Breakthrough hemolysis	Major adverse vascular event	I63.311	ICD-10-CM	Cerebral infarction due to thrombosis of right middle cerebral artery
Breakthrough hemolysis	Major adverse vascular event	I63.312	ICD-10-CM	Cerebral infarction due to thrombosis of left middle cerebral artery
Breakthrough hemolysis	Major adverse vascular event	I63.313	ICD-10-CM	Cerebral infarction due to thrombosis of bilateral middle cerebral arteries
Breakthrough hemolysis	Major adverse vascular event	I63.319	ICD-10-CM	Cerebral infarction due to thrombosis of unspecified middle cerebral artery
Breakthrough hemolysis	Major adverse vascular event	I63.32	ICD-10-CM	Cerebral infarction due to thrombosis of anterior cerebral artery
Breakthrough hemolysis	Major adverse vascular event	I63.321	ICD-10-CM	Cerebral infarction due to thrombosis of right anterior cerebral artery
Breakthrough hemolysis	Major adverse vascular event	I63.322	ICD-10-CM	Cerebral infarction due to thrombosis of left anterior cerebral artery
Breakthrough hemolysis	Major adverse vascular event	I63.323	ICD-10-CM	Cerebral infarction due to thrombosis of bilateral anterior cerebral arteries
Breakthrough hemolysis	Major adverse vascular event	I63.329	ICD-10-CM	Cerebral infarction due to thrombosis of unspecified anterior cerebral artery
Breakthrough hemolysis	Major adverse vascular event	I63.33	ICD-10-CM	Cerebral infarction due to thrombosis of posterior cerebral artery
Breakthrough hemolysis	Major adverse vascular event	I63.331	ICD-10-CM	Cerebral infarction due to thrombosis of right posterior cerebral artery
Breakthrough hemolysis	Major adverse vascular event	I63.332	ICD-10-CM	Cerebral infarction due to thrombosis of left posterior cerebral artery
Breakthrough hemolysis	Major adverse vascular event	I63.333	ICD-10-CM	Cerebral infarction due to thrombosis of bilateral posterior cerebral arteries
Breakthrough hemolysis	Major adverse vascular event	I63.339	ICD-10-CM	Cerebral infarction due to thrombosis of unspecified posterior cerebral artery
Breakthrough hemolysis	Major adverse vascular event	I63.34	ICD-10-CM	Cerebral infarction due to thrombosis of cerebellar artery
Breakthrough hemolysis	Major adverse vascular event	I63.341	ICD-10-CM	Cerebral infarction due to thrombosis of right cerebellar artery
Breakthrough hemolysis	Major adverse vascular event	I63.342	ICD-10-CM	Cerebral infarction due to thrombosis of left cerebellar artery
Breakthrough hemolysis	Major adverse vascular event	I63.343	ICD-10-CM	Cerebral infarction due to thrombosis of bilateral cerebellar arteries
Breakthrough hemolysis	Major adverse vascular event	I63.349	ICD-10-CM	Cerebral infarction due to thrombosis of unspecified cerebellar artery
Breakthrough hemolysis	Major adverse vascular event	I63.39	ICD-10-CM	Cerebral infarction due to thrombosis of other cerebral artery
Breakthrough hemolysis	Major adverse vascular event	I63.4	ICD-10-CM	Cerebral infarction due to embolism of cerebral arteries
Breakthrough hemolysis	Major adverse vascular event	I63.40	ICD-10-CM	Cerebral infarction due to embolism of unspecified cerebral artery
Breakthrough hemolysis	Major adverse vascular event	I63.41	ICD-10-CM	Cerebral infarction due to embolism of middle cerebral artery
Breakthrough hemolysis	Major adverse vascular event	I63.411	ICD-10-CM	Cerebral infarction due to embolism of right middle cerebral artery
Breakthrough hemolysis	Major adverse vascular event	I63.412	ICD-10-CM	Cerebral infarction due to embolism of left middle cerebral artery
Breakthrough hemolysis	Major adverse vascular event	I63.413	ICD-10-CM	Cerebral infarction due to embolism of bilateral middle cerebral arteries
Breakthrough hemolysis	Major adverse vascular event	I63.419	ICD-10-CM	Cerebral infarction due to embolism of unspecified middle cerebral artery
Breakthrough hemolysis	Major adverse vascular event	I63.42	ICD-10-CM	Cerebral infarction due to embolism of anterior cerebral artery
Breakthrough hemolysis	Major adverse vascular event	I63.421	ICD-10-CM	Cerebral infarction due to embolism of right anterior cerebral artery
Breakthrough hemolysis	Major adverse vascular event	I63.422	ICD-10-CM	Cerebral infarction due to embolism of left anterior cerebral artery
Breakthrough hemolysis	Major adverse vascular event	I63.423	ICD-10-CM	Cerebral infarction due to embolism of bilateral anterior cerebral arteries
Breakthrough hemolysis	Major adverse vascular event	I63.429	ICD-10-CM	Cerebral infarction due to embolism of unspecified anterior cerebral artery
Breakthrough hemolysis	Major adverse vascular event	I63.43	ICD-10-CM	Cerebral infarction due to embolism of posterior cerebral artery
Breakthrough hemolysis	Major adverse vascular event	I63.431	ICD-10-CM	Cerebral infarction due to embolism of right posterior cerebral artery
Breakthrough hemolysis	Major adverse vascular event	I63.432	ICD-10-CM	Cerebral infarction due to embolism of left posterior cerebral artery
Breakthrough hemolysis	Major adverse vascular event	I63.433	ICD-10-CM	Cerebral infarction due to embolism of bilateral posterior cerebral arteries
Breakthrough hemolysis	Major adverse vascular event	I63.439	ICD-10-CM	Cerebral infarction due to embolism of unspecified posterior cerebral artery
Breakthrough hemolysis	Major adverse vascular event	I63.44	ICD-10-CM	Cerebral infarction due to embolism of cerebellar artery
Breakthrough hemolysis	Major adverse vascular event	I63.441	ICD-10-CM	Cerebral infarction due to embolism of right cerebellar artery
Breakthrough hemolysis	Major adverse vascular event	I63.442	ICD-10-CM	Cerebral infarction due to embolism of left cerebellar artery
Breakthrough hemolysis	Major adverse vascular event	I63.443	ICD-10-CM	Cerebral infarction due to embolism of bilateral cerebellar arteries
Breakthrough hemolysis	Major adverse vascular event	I63.449	ICD-10-CM	Cerebral infarction due to embolism of unspecified cerebellar artery
Breakthrough hemolysis	Major adverse vascular event	I63.49	ICD-10-CM	Cerebral infarction due to embolism of other cerebral artery
Breakthrough hemolysis	Major adverse vascular event	I63.5	ICD-10-CM	Cerebral infarction due to unspecified occlusion or stenosis of cerebral arteries
Breakthrough hemolysis	Major adverse vascular event	I63.50	ICD-10-CM	Cerebral infarction due to unspecified occlusion or stenosis of unspecified cerebral artery
Breakthrough hemolysis	Major adverse vascular event	I63.51	ICD-10-CM	Cerebral infarction due to unspecified occlusion or stenosis of middle cerebral artery
Breakthrough hemolysis	Major adverse vascular event	I63.511	ICD-10-CM	Cerebral infarction due to unspecified occlusion or stenosis of right middle cerebral artery
Breakthrough hemolysis	Major adverse vascular event	I63.512	ICD-10-CM	Cerebral infarction due to unspecified occlusion or stenosis of left middle cerebral artery
Breakthrough hemolysis	Major adverse vascular event	I63.513	ICD-10-CM	Cerebral infarction due to unspecified occlusion or stenosis of bilateral middle cerebral arteries
Breakthrough hemolysis	Major adverse vascular event	I63.519	ICD-10-CM	Cerebral infarction due to unspecified occlusion or stenosis of unspecified middle cerebral artery
Breakthrough hemolysis	Major adverse vascular event	I63.52	ICD-10-CM	Cerebral infarction due to unspecified occlusion or stenosis of anterior cerebral artery
Breakthrough hemolysis	Major adverse vascular event	I63.521	ICD-10-CM	Cerebral infarction due to unspecified occlusion or stenosis of right anterior cerebral artery
Breakthrough hemolysis	Major adverse vascular event	I63.522	ICD-10-CM	Cerebral infarction due to unspecified occlusion or stenosis of left anterior cerebral artery
Breakthrough hemolysis	Major adverse vascular event	I63.523	ICD-10-CM	Cerebral infarction due to unspecified occlusion or stenosis of bilateral anterior cerebral arteries
Breakthrough hemolysis	Major adverse vascular event	I63.529	ICD-10-CM	Cerebral infarction due to unspecified occlusion or stenosis of unspecified anterior cerebral artery
Breakthrough hemolysis	Major adverse vascular event	I63.53	ICD-10-CM	Cerebral infarction due to unspecified occlusion or stenosis of posterior cerebral artery
Breakthrough hemolysis	Major adverse vascular event	I63.531	ICD-10-CM	Cerebral infarction due to unspecified occlusion or stenosis of right posterior cerebral artery
Breakthrough hemolysis	Major adverse vascular event	I63.532	ICD-10-CM	Cerebral infarction due to unspecified occlusion or stenosis of left posterior cerebral artery
Breakthrough hemolysis	Major adverse vascular event	I63.533	ICD-10-CM	Cerebral infarction due to unspecified occlusion or stenosis of bilateral posterior cerebral arteries
Breakthrough hemolysis	Major adverse vascular event	I63.539	ICD-10-CM	Cerebral infarction due to unspecified occlusion or stenosis of unspecified posterior cerebral artery
Breakthrough hemolysis	Major adverse vascular event	I63.54	ICD-10-CM	Cerebral infarction due to unspecified occlusion or stenosis of cerebellar artery
Breakthrough hemolysis	Major adverse vascular event	I63.541	ICD-10-CM	Cerebral infarction due to unspecified occlusion or stenosis of right cerebellar artery
Breakthrough hemolysis	Major adverse vascular event	I63.542	ICD-10-CM	Cerebral infarction due to unspecified occlusion or stenosis of left cerebellar artery
Breakthrough hemolysis	Major adverse vascular event	I63.543	ICD-10-CM	Cerebral infarction due to unspecified occlusion or stenosis of bilateral cerebellar arteries
Breakthrough hemolysis	Major adverse vascular event	I63.549	ICD-10-CM	Cerebral infarction due to unspecified occlusion or stenosis of unspecified cerebellar artery
Breakthrough hemolysis	Major adverse vascular event	I63.59	ICD-10-CM	Cerebral infarction due to unspecified occlusion or stenosis of other cerebral artery
Breakthrough hemolysis	Major adverse vascular event	I63.6	ICD-10-CM	Cerebral infarction due to cerebral venous thrombosis, nonpyogenic
Breakthrough hemolysis	Major adverse vascular event	I63.8	ICD-10-CM	Other cerebral infarction
Breakthrough hemolysis	Major adverse vascular event	I63.81	ICD-10-CM	Other cerebral infarction due to occlusion or stenosis of small artery
Breakthrough hemolysis	Major adverse vascular event	I63.89	ICD-10-CM	Other cerebral infarction
Breakthrough hemolysis	Major adverse vascular event	I63.9	ICD-10-CM	Cerebral infarction, unspecified
Breakthrough hemolysis	Major adverse vascular event	I82	ICD-10-CM	Other venous embolism and thrombosis
Breakthrough hemolysis	Major adverse vascular event	I82.0	ICD-10-CM	Budd-Chiari syndrome
Breakthrough hemolysis	Major adverse vascular event	I82.1	ICD-10-CM	Thrombophlebitis migrans
Breakthrough hemolysis	Major adverse vascular event	I82.2	ICD-10-CM	Embolism and thrombosis of vena cava and other thoracic veins
Breakthrough hemolysis	Major adverse vascular event	I82.21	ICD-10-CM	Embolism and thrombosis of superior vena cava
Breakthrough hemolysis	Major adverse vascular event	I82.210	ICD-10-CM	Acute embolism and thrombosis of superior vena cava
Breakthrough hemolysis	Major adverse vascular event	I82.211	ICD-10-CM	Chronic embolism and thrombosis of superior vena cava
Breakthrough hemolysis	Major adverse vascular event	I82.22	ICD-10-CM	Embolism and thrombosis of inferior vena cava
Breakthrough hemolysis	Major adverse vascular event	I82.220	ICD-10-CM	Acute embolism and thrombosis of inferior vena cava
Breakthrough hemolysis	Major adverse vascular event	I82.221	ICD-10-CM	Chronic embolism and thrombosis of inferior vena cava
Breakthrough hemolysis	Major adverse vascular event	I82.29	ICD-10-CM	Embolism and thrombosis of other thoracic veins
Breakthrough hemolysis	Major adverse vascular event	I82.290	ICD-10-CM	Acute embolism and thrombosis of other thoracic veins
Breakthrough hemolysis	Major adverse vascular event	I82.291	ICD-10-CM	Chronic embolism and thrombosis of other thoracic veins
Breakthrough hemolysis	Major adverse vascular event	I82.3	ICD-10-CM	Embolism and thrombosis of renal vein
Breakthrough hemolysis	Major adverse vascular event	I82.4	ICD-10-CM	Acute embolism and thrombosis of deep veins of lower extremity
Breakthrough hemolysis	Major adverse vascular event	I82.40	ICD-10-CM	Acute embolism and thrombosis of unspecified deep veins of lower extremity
Breakthrough hemolysis	Major adverse vascular event	I82.401	ICD-10-CM	Acute embolism and thrombosis of unspecified deep veins of right lower extremity
Breakthrough hemolysis	Major adverse vascular event	I82.402	ICD-10-CM	Acute embolism and thrombosis of unspecified deep veins of left lower extremity
Breakthrough hemolysis	Major adverse vascular event	I82.403	ICD-10-CM	Acute embolism and thrombosis of unspecified deep veins of lower extremity, bilateral
Breakthrough hemolysis	Major adverse vascular event	I82.409	ICD-10-CM	Acute embolism and thrombosis of unspecified deep veins of unspecified lower extremity
Breakthrough hemolysis	Major adverse vascular event	I82.41	ICD-10-CM	Acute embolism and thrombosis of femoral vein
Breakthrough hemolysis	Major adverse vascular event	I82.411	ICD-10-CM	Acute embolism and thrombosis of right femoral vein
Breakthrough hemolysis	Major adverse vascular event	I82.412	ICD-10-CM	Acute embolism and thrombosis of left femoral vein
Breakthrough hemolysis	Major adverse vascular event	I82.413	ICD-10-CM	Acute embolism and thrombosis of femoral vein, bilateral
Breakthrough hemolysis	Major adverse vascular event	I82.419	ICD-10-CM	Acute embolism and thrombosis of unspecified femoral vein
Breakthrough hemolysis	Major adverse vascular event	I82.42	ICD-10-CM	Acute embolism and thrombosis of iliac vein
Breakthrough hemolysis	Major adverse vascular event	I82.421	ICD-10-CM	Acute embolism and thrombosis of right iliac vein
Breakthrough hemolysis	Major adverse vascular event	I82.422	ICD-10-CM	Acute embolism and thrombosis of left iliac vein
Breakthrough hemolysis	Major adverse vascular event	I82.423	ICD-10-CM	Acute embolism and thrombosis of iliac vein, bilateral
Breakthrough hemolysis	Major adverse vascular event	I82.429	ICD-10-CM	Acute embolism and thrombosis of unspecified iliac vein
Breakthrough hemolysis	Major adverse vascular event	I82.43	ICD-10-CM	Acute embolism and thrombosis of popliteal vein
Breakthrough hemolysis	Major adverse vascular event	I82.431	ICD-10-CM	Acute embolism and thrombosis of right popliteal vein
Breakthrough hemolysis	Major adverse vascular event	I82.432	ICD-10-CM	Acute embolism and thrombosis of left popliteal vein
Breakthrough hemolysis	Major adverse vascular event	I82.433	ICD-10-CM	Acute embolism and thrombosis of popliteal vein, bilateral
Breakthrough hemolysis	Major adverse vascular event	I82.439	ICD-10-CM	Acute embolism and thrombosis of unspecified popliteal vein
Breakthrough hemolysis	Major adverse vascular event	I82.44	ICD-10-CM	Acute embolism and thrombosis of tibial vein
Breakthrough hemolysis	Major adverse vascular event	I82.441	ICD-10-CM	Acute embolism and thrombosis of right tibial vein
Breakthrough hemolysis	Major adverse vascular event	I82.442	ICD-10-CM	Acute embolism and thrombosis of left tibial vein
Breakthrough hemolysis	Major adverse vascular event	I82.443	ICD-10-CM	Acute embolism and thrombosis of tibial vein, bilateral
Breakthrough hemolysis	Major adverse vascular event	I82.449	ICD-10-CM	Acute embolism and thrombosis of unspecified tibial vein
Breakthrough hemolysis	Major adverse vascular event	I82.45	ICD-10-CM	Acute embolism and thrombosis of peroneal vein
Breakthrough hemolysis	Major adverse vascular event	I82.451	ICD-10-CM	Acute embolism and thrombosis of right peroneal vein
Breakthrough hemolysis	Major adverse vascular event	I82.452	ICD-10-CM	Acute embolism and thrombosis of left peroneal vein
Breakthrough hemolysis	Major adverse vascular event	I82.453	ICD-10-CM	Acute embolism and thrombosis of peroneal vein, bilateral
Breakthrough hemolysis	Major adverse vascular event	I82.459	ICD-10-CM	Acute embolism and thrombosis of unspecified peroneal vein
Breakthrough hemolysis	Major adverse vascular event	I82.46	ICD-10-CM	Acute embolism and thrombosis of calf muscular vein
Breakthrough hemolysis	Major adverse vascular event	I82.461	ICD-10-CM	Acute embolism and thrombosis of right calf muscular vein
Breakthrough hemolysis	Major adverse vascular event	I82.462	ICD-10-CM	Acute embolism and thrombosis of left calf muscular vein
Breakthrough hemolysis	Major adverse vascular event	I82.463	ICD-10-CM	Acute embolism and thrombosis of calf muscular vein, bilateral
Breakthrough hemolysis	Major adverse vascular event	I82.469	ICD-10-CM	Acute embolism and thrombosis of unspecified calf muscular vein
Breakthrough hemolysis	Major adverse vascular event	I82.49	ICD-10-CM	Acute embolism and thrombosis of other specified deep vein of lower extremity
Breakthrough hemolysis	Major adverse vascular event	I82.491	ICD-10-CM	Acute embolism and thrombosis of other specified deep vein of right lower extremity
Breakthrough hemolysis	Major adverse vascular event	I82.492	ICD-10-CM	Acute embolism and thrombosis of other specified deep vein of left lower extremity
Breakthrough hemolysis	Major adverse vascular event	I82.493	ICD-10-CM	Acute embolism and thrombosis of other specified deep vein of lower extremity, bilateral
Breakthrough hemolysis	Major adverse vascular event	I82.499	ICD-10-CM	Acute embolism and thrombosis of other specified deep vein of unspecified lower extremity
Breakthrough hemolysis	Major adverse vascular event	I82.4Y	ICD-10-CM	Acute embolism and thrombosis of unspecified deep veins of proximal lower extremity
Breakthrough hemolysis	Major adverse vascular event	I82.4Y1	ICD-10-CM	Acute embolism and thrombosis of unspecified deep veins of right proximal lower extremity
Breakthrough hemolysis	Major adverse vascular event	I82.4Y2	ICD-10-CM	Acute embolism and thrombosis of unspecified deep veins of left proximal lower extremity
Breakthrough hemolysis	Major adverse vascular event	I82.4Y3	ICD-10-CM	Acute embolism and thrombosis of unspecified deep veins of proximal lower extremity, bilateral
Breakthrough hemolysis	Major adverse vascular event	I82.4Y9	ICD-10-CM	Acute embolism and thrombosis of unspecified deep veins of unspecified proximal lower extremity
Breakthrough hemolysis	Major adverse vascular event	I82.4Z	ICD-10-CM	Acute embolism and thrombosis of unspecified deep veins of distal lower extremity
Breakthrough hemolysis	Major adverse vascular event	I82.4Z1	ICD-10-CM	Acute embolism and thrombosis of unspecified deep veins of right distal lower extremity
Breakthrough hemolysis	Major adverse vascular event	I82.4Z2	ICD-10-CM	Acute embolism and thrombosis of unspecified deep veins of left distal lower extremity
Breakthrough hemolysis	Major adverse vascular event	I82.4Z3	ICD-10-CM	Acute embolism and thrombosis of unspecified deep veins of distal lower extremity, bilateral
Breakthrough hemolysis	Major adverse vascular event	I82.4Z9	ICD-10-CM	Acute embolism and thrombosis of unspecified deep veins of unspecified distal lower extremity
Breakthrough hemolysis	Major adverse vascular event	I82.5	ICD-10-CM	Chronic embolism and thrombosis of deep veins of lower extremity
Breakthrough hemolysis	Major adverse vascular event	I82.50	ICD-10-CM	Chronic embolism and thrombosis of unspecified deep veins of lower extremity
Breakthrough hemolysis	Major adverse vascular event	I82.501	ICD-10-CM	Chronic embolism and thrombosis of unspecified deep veins of right lower extremity
Breakthrough hemolysis	Major adverse vascular event	I82.502	ICD-10-CM	Chronic embolism and thrombosis of unspecified deep veins of left lower extremity
Breakthrough hemolysis	Major adverse vascular event	I82.503	ICD-10-CM	Chronic embolism and thrombosis of unspecified deep veins of lower extremity, bilateral
Breakthrough hemolysis	Major adverse vascular event	I82.509	ICD-10-CM	Chronic embolism and thrombosis of unspecified deep veins of unspecified lower extremity
Breakthrough hemolysis	Major adverse vascular event	I82.51	ICD-10-CM	Chronic embolism and thrombosis of femoral vein
Breakthrough hemolysis	Major adverse vascular event	I82.511	ICD-10-CM	Chronic embolism and thrombosis of right femoral vein
Breakthrough hemolysis	Major adverse vascular event	I82.512	ICD-10-CM	Chronic embolism and thrombosis of left femoral vein
Breakthrough hemolysis	Major adverse vascular event	I82.513	ICD-10-CM	Chronic embolism and thrombosis of femoral vein, bilateral
Breakthrough hemolysis	Major adverse vascular event	I82.519	ICD-10-CM	Chronic embolism and thrombosis of unspecified femoral vein
Breakthrough hemolysis	Major adverse vascular event	I82.52	ICD-10-CM	Chronic embolism and thrombosis of iliac vein
Breakthrough hemolysis	Major adverse vascular event	I82.521	ICD-10-CM	Chronic embolism and thrombosis of right iliac vein
Breakthrough hemolysis	Major adverse vascular event	I82.522	ICD-10-CM	Chronic embolism and thrombosis of left iliac vein
Breakthrough hemolysis	Major adverse vascular event	I82.523	ICD-10-CM	Chronic embolism and thrombosis of iliac vein, bilateral
Breakthrough hemolysis	Major adverse vascular event	I82.529	ICD-10-CM	Chronic embolism and thrombosis of unspecified iliac vein
Breakthrough hemolysis	Major adverse vascular event	I82.53	ICD-10-CM	Chronic embolism and thrombosis of popliteal vein
Breakthrough hemolysis	Major adverse vascular event	I82.531	ICD-10-CM	Chronic embolism and thrombosis of right popliteal vein
Breakthrough hemolysis	Major adverse vascular event	I82.532	ICD-10-CM	Chronic embolism and thrombosis of left popliteal vein
Breakthrough hemolysis	Major adverse vascular event	I82.533	ICD-10-CM	Chronic embolism and thrombosis of popliteal vein, bilateral
Breakthrough hemolysis	Major adverse vascular event	I82.539	ICD-10-CM	Chronic embolism and thrombosis of unspecified popliteal vein
Breakthrough hemolysis	Major adverse vascular event	I82.54	ICD-10-CM	Chronic embolism and thrombosis of tibial vein
Breakthrough hemolysis	Major adverse vascular event	I82.541	ICD-10-CM	Chronic embolism and thrombosis of right tibial vein
Breakthrough hemolysis	Major adverse vascular event	I82.542	ICD-10-CM	Chronic embolism and thrombosis of left tibial vein
Breakthrough hemolysis	Major adverse vascular event	I82.543	ICD-10-CM	Chronic embolism and thrombosis of tibial vein, bilateral
Breakthrough hemolysis	Major adverse vascular event	I82.549	ICD-10-CM	Chronic embolism and thrombosis of unspecified tibial vein
Breakthrough hemolysis	Major adverse vascular event	I82.55	ICD-10-CM	Chronic embolism and thrombosis of peroneal vein
Breakthrough hemolysis	Major adverse vascular event	I82.551	ICD-10-CM	Chronic embolism and thrombosis of right peroneal vein
Breakthrough hemolysis	Major adverse vascular event	I82.552	ICD-10-CM	Chronic embolism and thrombosis of left peroneal vein
Breakthrough hemolysis	Major adverse vascular event	I82.553	ICD-10-CM	Chronic embolism and thrombosis of peroneal vein, bilateral
Breakthrough hemolysis	Major adverse vascular event	I82.559	ICD-10-CM	Chronic embolism and thrombosis of unspecified peroneal vein
Breakthrough hemolysis	Major adverse vascular event	I82.56	ICD-10-CM	Chronic embolism and thrombosis of calf muscular vein
Breakthrough hemolysis	Major adverse vascular event	I82.561	ICD-10-CM	Chronic embolism and thrombosis of right calf muscular vein
Breakthrough hemolysis	Major adverse vascular event	I82.562	ICD-10-CM	Chronic embolism and thrombosis of left calf muscular vein
Breakthrough hemolysis	Major adverse vascular event	I82.563	ICD-10-CM	Chronic embolism and thrombosis of calf muscular vein, bilateral
Breakthrough hemolysis	Major adverse vascular event	I82.569	ICD-10-CM	Chronic embolism and thrombosis of unspecified calf muscular vein
Breakthrough hemolysis	Major adverse vascular event	I82.59	ICD-10-CM	Chronic embolism and thrombosis of other specified deep vein of lower extremity
Breakthrough hemolysis	Major adverse vascular event	I82.591	ICD-10-CM	Chronic embolism and thrombosis of other specified deep vein of right lower extremity
Breakthrough hemolysis	Major adverse vascular event	I82.592	ICD-10-CM	Chronic embolism and thrombosis of other specified deep vein of left lower extremity
Breakthrough hemolysis	Major adverse vascular event	I82.593	ICD-10-CM	Chronic embolism and thrombosis of other specified deep vein of lower extremity, bilateral
Breakthrough hemolysis	Major adverse vascular event	I82.599	ICD-10-CM	Chronic embolism and thrombosis of other specified deep vein of unspecified lower extremity
Breakthrough hemolysis	Major adverse vascular event	I82.5Y	ICD-10-CM	Chronic embolism and thrombosis of unspecified deep veins of proximal lower extremity
Breakthrough hemolysis	Major adverse vascular event	I82.5Y1	ICD-10-CM	Chronic embolism and thrombosis of unspecified deep veins of right proximal lower extremity
Breakthrough hemolysis	Major adverse vascular event	I82.5Y2	ICD-10-CM	Chronic embolism and thrombosis of unspecified deep veins of left proximal lower extremity
Breakthrough hemolysis	Major adverse vascular event	I82.5Y3	ICD-10-CM	Chronic embolism and thrombosis of unspecified deep veins of proximal lower extremity, bilateral
Breakthrough hemolysis	Major adverse vascular event	I82.5Y9	ICD-10-CM	Chronic embolism and thrombosis of unspecified deep veins of unspecified proximal lower extremity
Breakthrough hemolysis	Major adverse vascular event	I82.5Z	ICD-10-CM	Chronic embolism and thrombosis of unspecified deep veins of distal lower extremity
Breakthrough hemolysis	Major adverse vascular event	I82.5Z1	ICD-10-CM	Chronic embolism and thrombosis of unspecified deep veins of right distal lower extremity
Breakthrough hemolysis	Major adverse vascular event	I82.5Z2	ICD-10-CM	Chronic embolism and thrombosis of unspecified deep veins of left distal lower extremity
Breakthrough hemolysis	Major adverse vascular event	I82.5Z3	ICD-10-CM	Chronic embolism and thrombosis of unspecified deep veins of distal lower extremity, bilateral
Breakthrough hemolysis	Major adverse vascular event	I82.5Z9	ICD-10-CM	Chronic embolism and thrombosis of unspecified deep veins of unspecified distal lower extremity
Breakthrough hemolysis	Major adverse vascular event	I82.6	ICD-10-CM	Acute embolism and thrombosis of veins of upper extremity
Breakthrough hemolysis	Major adverse vascular event	I82.60	ICD-10-CM	Acute embolism and thrombosis of unspecified veins of upper extremity
Breakthrough hemolysis	Major adverse vascular event	I82.601	ICD-10-CM	Acute embolism and thrombosis of unspecified veins of right upper extremity
Breakthrough hemolysis	Major adverse vascular event	I82.602	ICD-10-CM	Acute embolism and thrombosis of unspecified veins of left upper extremity
Breakthrough hemolysis	Major adverse vascular event	I82.603	ICD-10-CM	Acute embolism and thrombosis of unspecified veins of upper extremity, bilateral
Breakthrough hemolysis	Major adverse vascular event	I82.609	ICD-10-CM	Acute embolism and thrombosis of unspecified veins of unspecified upper extremity
Breakthrough hemolysis	Major adverse vascular event	I82.61	ICD-10-CM	Acute embolism and thrombosis of superficial veins of upper extremity
Breakthrough hemolysis	Major adverse vascular event	I82.611	ICD-10-CM	Acute embolism and thrombosis of superficial veins of right upper extremity
Breakthrough hemolysis	Major adverse vascular event	I82.612	ICD-10-CM	Acute embolism and thrombosis of superficial veins of left upper extremity
Breakthrough hemolysis	Major adverse vascular event	I82.613	ICD-10-CM	Acute embolism and thrombosis of superficial veins of upper extremity, bilateral
Breakthrough hemolysis	Major adverse vascular event	I82.619	ICD-10-CM	Acute embolism and thrombosis of superficial veins of unspecified upper extremity
Breakthrough hemolysis	Major adverse vascular event	I82.62	ICD-10-CM	Acute embolism and thrombosis of deep veins of upper extremity
Breakthrough hemolysis	Major adverse vascular event	I82.621	ICD-10-CM	Acute embolism and thrombosis of deep veins of right upper extremity
Breakthrough hemolysis	Major adverse vascular event	I82.622	ICD-10-CM	Acute embolism and thrombosis of deep veins of left upper extremity
Breakthrough hemolysis	Major adverse vascular event	I82.623	ICD-10-CM	Acute embolism and thrombosis of deep veins of upper extremity, bilateral
Breakthrough hemolysis	Major adverse vascular event	I82.629	ICD-10-CM	Acute embolism and thrombosis of deep veins of unspecified upper extremity
Breakthrough hemolysis	Major adverse vascular event	I82.7	ICD-10-CM	Chronic embolism and thrombosis of veins of upper extremity
Breakthrough hemolysis	Major adverse vascular event	I82.70	ICD-10-CM	Chronic embolism and thrombosis of unspecified veins of upper extremity
Breakthrough hemolysis	Major adverse vascular event	I82.701	ICD-10-CM	Chronic embolism and thrombosis of unspecified veins of right upper extremity
Breakthrough hemolysis	Major adverse vascular event	I82.702	ICD-10-CM	Chronic embolism and thrombosis of unspecified veins of left upper extremity
Breakthrough hemolysis	Major adverse vascular event	I82.703	ICD-10-CM	Chronic embolism and thrombosis of unspecified veins of upper extremity, bilateral
Breakthrough hemolysis	Major adverse vascular event	I82.709	ICD-10-CM	Chronic embolism and thrombosis of unspecified veins of unspecified upper extremity
Breakthrough hemolysis	Major adverse vascular event	I82.71	ICD-10-CM	Chronic embolism and thrombosis of superficial veins of upper extremity
Breakthrough hemolysis	Major adverse vascular event	I82.711	ICD-10-CM	Chronic embolism and thrombosis of superficial veins of right upper extremity
Breakthrough hemolysis	Major adverse vascular event	I82.712	ICD-10-CM	Chronic embolism and thrombosis of superficial veins of left upper extremity
Breakthrough hemolysis	Major adverse vascular event	I82.713	ICD-10-CM	Chronic embolism and thrombosis of superficial veins of upper extremity, bilateral
Breakthrough hemolysis	Major adverse vascular event	I82.719	ICD-10-CM	Chronic embolism and thrombosis of superficial veins of unspecified upper extremity
Breakthrough hemolysis	Major adverse vascular event	I82.72	ICD-10-CM	Chronic embolism and thrombosis of deep veins of upper extremity
Breakthrough hemolysis	Major adverse vascular event	I82.721	ICD-10-CM	Chronic embolism and thrombosis of deep veins of right upper extremity
Breakthrough hemolysis	Major adverse vascular event	I82.722	ICD-10-CM	Chronic embolism and thrombosis of deep veins of left upper extremity
Breakthrough hemolysis	Major adverse vascular event	I82.723	ICD-10-CM	Chronic embolism and thrombosis of deep veins of upper extremity, bilateral
Breakthrough hemolysis	Major adverse vascular event	I82.729	ICD-10-CM	Chronic embolism and thrombosis of deep veins of unspecified upper extremity
Breakthrough hemolysis	Major adverse vascular event	I82.8	ICD-10-CM	Embolism and thrombosis of other specified veins
Breakthrough hemolysis	Major adverse vascular event	I82.81	ICD-10-CM	Embolism and thrombosis of superficial veins of lower extremities
Breakthrough hemolysis	Major adverse vascular event	I82.811	ICD-10-CM	Embolism and thrombosis of superficial veins of right lower extremity
Breakthrough hemolysis	Major adverse vascular event	I82.812	ICD-10-CM	Embolism and thrombosis of superficial veins of left lower extremity
Breakthrough hemolysis	Major adverse vascular event	I82.813	ICD-10-CM	Embolism and thrombosis of superficial veins of lower extremities, bilateral
Breakthrough hemolysis	Major adverse vascular event	I82.819	ICD-10-CM	Embolism and thrombosis of superficial veins of unspecified lower extremity
Breakthrough hemolysis	Major adverse vascular event	I82.89	ICD-10-CM	Embolism and thrombosis of other specified veins
Breakthrough hemolysis	Major adverse vascular event	I82.890	ICD-10-CM	Acute embolism and thrombosis of other specified veins
Breakthrough hemolysis	Major adverse vascular event	I82.891	ICD-10-CM	Chronic embolism and thrombosis of other specified veins
Breakthrough hemolysis	Major adverse vascular event	I82.9	ICD-10-CM	Embolism and thrombosis of unspecified vein
Breakthrough hemolysis	Major adverse vascular event	I82.90	ICD-10-CM	Acute embolism and thrombosis of unspecified vein
Breakthrough hemolysis	Major adverse vascular event	I82.91	ICD-10-CM	Chronic embolism and thrombosis of unspecified vein
Breakthrough hemolysis	Major adverse vascular event	I82.A	ICD-10-CM	Embolism and thrombosis of axillary vein
Breakthrough hemolysis	Major adverse vascular event	I82.A1	ICD-10-CM	Acute embolism and thrombosis of axillary vein
Breakthrough hemolysis	Major adverse vascular event	I82.A11	ICD-10-CM	Acute embolism and thrombosis of right axillary vein
Breakthrough hemolysis	Major adverse vascular event	I82.A12	ICD-10-CM	Acute embolism and thrombosis of left axillary vein
Breakthrough hemolysis	Major adverse vascular event	I82.A13	ICD-10-CM	Acute embolism and thrombosis of axillary vein, bilateral
Breakthrough hemolysis	Major adverse vascular event	I82.A19	ICD-10-CM	Acute embolism and thrombosis of unspecified axillary vein
Breakthrough hemolysis	Major adverse vascular event	I82.A2	ICD-10-CM	Chronic embolism and thrombosis of axillary vein
Breakthrough hemolysis	Major adverse vascular event	I82.A21	ICD-10-CM	Chronic embolism and thrombosis of right axillary vein
Breakthrough hemolysis	Major adverse vascular event	I82.A22	ICD-10-CM	Chronic embolism and thrombosis of left axillary vein
Breakthrough hemolysis	Major adverse vascular event	I82.A23	ICD-10-CM	Chronic embolism and thrombosis of axillary vein, bilateral
Breakthrough hemolysis	Major adverse vascular event	I82.A29	ICD-10-CM	Chronic embolism and thrombosis of unspecified axillary vein
Breakthrough hemolysis	Major adverse vascular event	I82.B	ICD-10-CM	Embolism and thrombosis of subclavian vein
Breakthrough hemolysis	Major adverse vascular event	I82.B1	ICD-10-CM	Acute embolism and thrombosis of subclavian vein
Breakthrough hemolysis	Major adverse vascular event	I82.B11	ICD-10-CM	Acute embolism and thrombosis of right subclavian vein
Breakthrough hemolysis	Major adverse vascular event	I82.B12	ICD-10-CM	Acute embolism and thrombosis of left subclavian vein
Breakthrough hemolysis	Major adverse vascular event	I82.B13	ICD-10-CM	Acute embolism and thrombosis of subclavian vein, bilateral
Breakthrough hemolysis	Major adverse vascular event	I82.B19	ICD-10-CM	Acute embolism and thrombosis of unspecified subclavian vein
Breakthrough hemolysis	Major adverse vascular event	I82.B2	ICD-10-CM	Chronic embolism and thrombosis of subclavian vein
Breakthrough hemolysis	Major adverse vascular event	I82.B21	ICD-10-CM	Chronic embolism and thrombosis of right subclavian vein
Breakthrough hemolysis	Major adverse vascular event	I82.B22	ICD-10-CM	Chronic embolism and thrombosis of left subclavian vein
Breakthrough hemolysis	Major adverse vascular event	I82.B23	ICD-10-CM	Chronic embolism and thrombosis of subclavian vein, bilateral
Breakthrough hemolysis	Major adverse vascular event	I82.B29	ICD-10-CM	Chronic embolism and thrombosis of unspecified subclavian vein
Breakthrough hemolysis	Major adverse vascular event	I82.C	ICD-10-CM	Embolism and thrombosis of internal jugular vein
Breakthrough hemolysis	Major adverse vascular event	I82.C1	ICD-10-CM	Acute embolism and thrombosis of internal jugular vein
Breakthrough hemolysis	Major adverse vascular event	I82.C11	ICD-10-CM	Acute embolism and thrombosis of right internal jugular vein
Breakthrough hemolysis	Major adverse vascular event	I82.C12	ICD-10-CM	Acute embolism and thrombosis of left internal jugular vein
Breakthrough hemolysis	Major adverse vascular event	I82.C13	ICD-10-CM	Acute embolism and thrombosis of internal jugular vein, bilateral
Breakthrough hemolysis	Major adverse vascular event	I82.C19	ICD-10-CM	Acute embolism and thrombosis of unspecified internal jugular vein
Breakthrough hemolysis	Major adverse vascular event	I82.C2	ICD-10-CM	Chronic embolism and thrombosis of internal jugular vein
Breakthrough hemolysis	Major adverse vascular event	I82.C21	ICD-10-CM	Chronic embolism and thrombosis of right internal jugular vein
Breakthrough hemolysis	Major adverse vascular event	I82.C22	ICD-10-CM	Chronic embolism and thrombosis of left internal jugular vein
Breakthrough hemolysis	Major adverse vascular event	I82.C23	ICD-10-CM	Chronic embolism and thrombosis of internal jugular vein, bilateral
Breakthrough hemolysis	Major adverse vascular event	I82.C29	ICD-10-CM	Chronic embolism and thrombosis of unspecified internal jugular vein
Breakthrough hemolysis	Major adverse vascular event	I74	ICD-10-CM	Arterial embolism and thrombosis
Breakthrough hemolysis	Major adverse vascular event	I74.0	ICD-10-CM	Embolism and thrombosis of abdominal aorta
Breakthrough hemolysis	Major adverse vascular event	I74.01	ICD-10-CM	Saddle embolus of abdominal aorta
Breakthrough hemolysis	Major adverse vascular event	I74.09	ICD-10-CM	Other arterial embolism and thrombosis of abdominal aorta
Breakthrough hemolysis	Major adverse vascular event	I74.1	ICD-10-CM	Embolism and thrombosis of other and unspecified parts of aorta
Breakthrough hemolysis	Major adverse vascular event	I74.10	ICD-10-CM	Embolism and thrombosis of unspecified parts of aorta
Breakthrough hemolysis	Major adverse vascular event	I74.11	ICD-10-CM	Embolism and thrombosis of thoracic aorta
Breakthrough hemolysis	Major adverse vascular event	I74.19	ICD-10-CM	Embolism and thrombosis of other parts of aorta
Breakthrough hemolysis	Major adverse vascular event	I74.2	ICD-10-CM	Embolism and thrombosis of arteries of the upper extremities
Breakthrough hemolysis	Major adverse vascular event	I74.3	ICD-10-CM	Embolism and thrombosis of arteries of the lower extremities
Breakthrough hemolysis	Major adverse vascular event	I74.4	ICD-10-CM	Embolism and thrombosis of arteries of extremities, unspecified
Breakthrough hemolysis	Major adverse vascular event	I74.5	ICD-10-CM	Embolism and thrombosis of iliac artery
Breakthrough hemolysis	Major adverse vascular event	I74.8	ICD-10-CM	Embolism and thrombosis of other arteries
Breakthrough hemolysis	Major adverse vascular event	I74.9	ICD-10-CM	Embolism and thrombosis of unspecified artery
Breakthrough hemolysis	Major adverse vascular event	I21	ICD-10-CM	Acute myocardial infarction
Breakthrough hemolysis	Major adverse vascular event	I21.0	ICD-10-CM	ST elevation (STEMI) myocardial infarction of anterior wall
Breakthrough hemolysis	Major adverse vascular event	I21.01	ICD-10-CM	ST elevation (STEMI) myocardial infarction involving left main coronary artery
Breakthrough hemolysis	Major adverse vascular event	I21.02	ICD-10-CM	ST elevation (STEMI) myocardial infarction involving left anterior descending coronary artery
Breakthrough hemolysis	Major adverse vascular event	I21.09	ICD-10-CM	ST elevation (STEMI) myocardial infarction involving other coronary artery of anterior wall
Breakthrough hemolysis	Major adverse vascular event	I21.1	ICD-10-CM	ST elevation (STEMI) myocardial infarction of inferior wall
Breakthrough hemolysis	Major adverse vascular event	I21.11	ICD-10-CM	ST elevation (STEMI) myocardial infarction involving right coronary artery
Breakthrough hemolysis	Major adverse vascular event	I21.19	ICD-10-CM	ST elevation (STEMI) myocardial infarction involving other coronary artery of inferior wall
Breakthrough hemolysis	Major adverse vascular event	I21.2	ICD-10-CM	ST elevation (STEMI) myocardial infarction of other sites
Breakthrough hemolysis	Major adverse vascular event	I21.21	ICD-10-CM	ST elevation (STEMI) myocardial infarction involving left circumflex coronary artery
Breakthrough hemolysis	Major adverse vascular event	I21.29	ICD-10-CM	ST elevation (STEMI) myocardial infarction involving other sites
Breakthrough hemolysis	Major adverse vascular event	I21.3	ICD-10-CM	ST elevation (STEMI) myocardial infarction of unspecified site
Breakthrough hemolysis	Major adverse vascular event	I21.4	ICD-10-CM	Non-ST elevation (NSTEMI) myocardial infarction
Breakthrough hemolysis	Major adverse vascular event	I21.9	ICD-10-CM	Acute myocardial infarction, unspecified
Breakthrough hemolysis	Major adverse vascular event	I21.A	ICD-10-CM	Other type of myocardial infarction
Breakthrough hemolysis	Major adverse vascular event	I21.A1	ICD-10-CM	Myocardial infarction type 2
Breakthrough hemolysis	Major adverse vascular event	I21.A9	ICD-10-CM	Other myocardial infarction type
Breakthrough hemolysis	Major adverse vascular event	I22	ICD-10-CM	Subsequent ST elevation (STEMI) and non-ST elevation (NSTEMI) myocardial infarction
Breakthrough hemolysis	Major adverse vascular event	I22.0	ICD-10-CM	Subsequent ST elevation (STEMI) myocardial infarction of anterior wall
Breakthrough hemolysis	Major adverse vascular event	I22.1	ICD-10-CM	Subsequent ST elevation (STEMI) myocardial infarction of inferior wall
Breakthrough hemolysis	Major adverse vascular event	I22.2	ICD-10-CM	Subsequent non-ST elevation (NSTEMI) myocardial infarction
Breakthrough hemolysis	Major adverse vascular event	I22.8	ICD-10-CM	Subsequent ST elevation (STEMI) myocardial infarction of other sites
Breakthrough hemolysis	Major adverse vascular event	I22.9	ICD-10-CM	Subsequent ST elevation (STEMI) myocardial infarction of unspecified site
Breakthrough hemolysis	Major adverse vascular event	I23	ICD-10-CM	Certain current complications following ST elevation (STEMI) and non-ST elevation (NSTEMI) myocardial infarction (within the 28 day period)
Breakthrough hemolysis	Major adverse vascular event	I23.0	ICD-10-CM	Hemopericardium as current complication following acute myocardial infarction
Breakthrough hemolysis	Major adverse vascular event	I23.1	ICD-10-CM	Atrial septal defect as current complication following acute myocardial infarction
Breakthrough hemolysis	Major adverse vascular event	I23.2	ICD-10-CM	Ventricular septal defect as current complication following acute myocardial infarction
Breakthrough hemolysis	Major adverse vascular event	I23.3	ICD-10-CM	Rupture of cardiac wall without hemopericardium as current complication following acute myocardial infarction
Breakthrough hemolysis	Major adverse vascular event	I23.4	ICD-10-CM	Rupture of chordae tendineae as current complication following acute myocardial infarction
Breakthrough hemolysis	Major adverse vascular event	I23.5	ICD-10-CM	Rupture of papillary muscle as current complication following acute myocardial infarction
Breakthrough hemolysis	Major adverse vascular event	I23.6	ICD-10-CM	Thrombosis of atrium, auricular appendage, and ventricle as current complications following acute myocardial infarction
Breakthrough hemolysis	Major adverse vascular event	I23.7	ICD-10-CM	Postinfarction angina
Breakthrough hemolysis	Major adverse vascular event	I23.8	ICD-10-CM	Other current complications following acute myocardial infarction
CCI	Any malignancy	C01	ICD-10-CM	MALIGNANT NEOPLASM BASE OF TONGUE
CCI	Any malignancy	C02	ICD-10-CM	MAL NEOPLASM OTH & UNS PART TONGUE
CCI	Any malignancy	C02.0	ICD-10-CM	MAL NEOPLASM DORSAL SURFACE TONGUE
CCI	Any malignancy	C02.1	ICD-10-CM	MAL NEOPLASM OF BORDER OF TONGUE
CCI	Any malignancy	C02.2	ICD-10-CM	MAL NEOPLASM VENTRAL SURFCE TONGUE
CCI	Any malignancy	C02.3	ICD-10-CM	MAL NEOPLSM ANT 2/3 TONGUE PART UNS
CCI	Any malignancy	C02.4	ICD-10-CM	MALIGNANT NEOPLASM LINGUAL TONSIL
CCI	Any malignancy	C02.8	ICD-10-CM	MALIG NEOPLASM OVERLAP SITE TONGUE
CCI	Any malignancy	C02.9	ICD-10-CM	MALIG NEOPLASM TONGUE UNSPECIFIED
CCI	Any malignancy	C03	ICD-10-CM	MALIGNANT NEOPLASM OF GUM
CCI	Any malignancy	C03.0	ICD-10-CM	MALIGNANT NEOPLASM OF UPPER GUM
CCI	Any malignancy	C03.1	ICD-10-CM	MALIGNANT NEOPLASM OF LOWER GUM
CCI	Any malignancy	C03.9	ICD-10-CM	MALIGNANT NEOPLASM GUM UNSPECIFIED
CCI	Any malignancy	C04	ICD-10-CM	MALIGNANT NEOPLASM FLOOR OF MOUTH
CCI	Any malignancy	C04.0	ICD-10-CM	MALIGNANT NEOPLASM ANT FLOOR MOUTH
CCI	Any malignancy	C04.1	ICD-10-CM	MALIGNANT NEOPLASM LAT FLOOR MOUTH
CCI	Any malignancy	C04.8	ICD-10-CM	MAL NEOPLSM OVRLAP SITE FLOOR MOUTH
CCI	Any malignancy	C04.9	ICD-10-CM	MALIG NEOPLASM FLOOR OF MOUTH UNS
CCI	Any malignancy	C05	ICD-10-CM	MALIGNANT NEOPLASM OF PALATE
CCI	Any malignancy	C05.0	ICD-10-CM	MALIGNANT NEOPLASM OF HARD PALATE
CCI	Any malignancy	C05.1	ICD-10-CM	MALIGNANT NEOPLASM OF SOFT PALATE
CCI	Any malignancy	C05.2	ICD-10-CM	MALIGNANT NEOPLASM OF UVULA
CCI	Any malignancy	C05.8	ICD-10-CM	MALIG NEOPLASM OVERLAP SITES PALATE
CCI	Any malignancy	C05.9	ICD-10-CM	MALIG NEOPLASM PALATE UNSPECIFIED
CCI	Any malignancy	C06	ICD-10-CM	MALIG NEOPLASM OTH UNS PARTS MOUTH
CCI	Any malignancy	C06.0	ICD-10-CM	MALIGNANT NEOPLASM OF CHEEK MUCOSA
CCI	Any malignancy	C06.1	ICD-10-CM	MALIGNANT NEOPLASM VESTIBULE MOUTH
CCI	Any malignancy	C06.2	ICD-10-CM	MALIGNANT NEOPLASM RETROMOLAR AREA
CCI	Any malignancy	C06.8	ICD-10-CM	MAL NEO OVRLP SITE OTH UNS PART MTH
CCI	Any malignancy	C06.80	ICD-10-CM	MAL NEO OVERLAP SITE UNS PART MOUTH
CCI	Any malignancy	C06.89	ICD-10-CM	MAL NEO OVERLAP SITE OTH PART MOUTH
CCI	Any malignancy	C06.9	ICD-10-CM	MALIG NEOPLASM OF MOUTH UNSPECIFIED
CCI	Any malignancy	C07	ICD-10-CM	MALIGNANT NEOPLASM OF PAROTID GLAND
CCI	Any malignancy	C08	ICD-10-CM	MAL NEOPLSM OTH UNS MAJ SALIV GLAND
CCI	Any malignancy	C08.0	ICD-10-CM	MALIG NEOPLASM SUBMANDIBULAR GLAND
CCI	Any malignancy	C08.1	ICD-10-CM	MALIGNANT NEOPLASM SUBLINGUAL GLAND
CCI	Any malignancy	C08.9	ICD-10-CM	MAL NEOPLASM MAJ SALIVARY GLAND UNS
CCI	Any malignancy	C09	ICD-10-CM	MALIGNANT NEOPLASM OF TONSIL
CCI	Any malignancy	C09.0	ICD-10-CM	MALIGNANT NEOPLASM TONSILLAR FOSSA
CCI	Any malignancy	C09.1	ICD-10-CM	MALIGNANT NEOPLASM TONSILLAR PILLAR
CCI	Any malignancy	C09.8	ICD-10-CM	MALIG NEOPLASM OVERLAP SITES TONSIL
CCI	Any malignancy	C09.9	ICD-10-CM	MALIGNANT NEOPLASM TONSIL UNS
CCI	Any malignancy	C10	ICD-10-CM	MALIGNANT NEOPLASM OF OROPHARYNX
CCI	Any malignancy	C10.0	ICD-10-CM	MALIGNANT NEOPLASM OF VALLECULA
CCI	Any malignancy	C10.1	ICD-10-CM	MALIG NEOPLASM ANT SURFACE EPIGLOTT
CCI	Any malignancy	C10.2	ICD-10-CM	MALIG NEOPLASM LAT WALL OROPHARYNX
CCI	Any malignancy	C10.3	ICD-10-CM	MALIG NEOPLASM POST WALL OROPHARYNX
CCI	Any malignancy	C10.4	ICD-10-CM	MALIGNANT NEOPLASM BRANCHIAL CLEFT
CCI	Any malignancy	C10.8	ICD-10-CM	MAL NEOPLASM OVRLAP SITE OROPHARYNX
CCI	Any malignancy	C10.9	ICD-10-CM	MALIGNANT NEOPLASM OROPHARYNX UNS
CCI	Any malignancy	C11	ICD-10-CM	MALIGNANT NEOPLASM OF NASOPHARYNX
CCI	Any malignancy	C11.0	ICD-10-CM	MAL NEOPLASM SUP WALL NASOPHARYNX
CCI	Any malignancy	C11.1	ICD-10-CM	MAL NEOPLASM POST WALL NASOPHARYNX
CCI	Any malignancy	C11.2	ICD-10-CM	MAL NEOPLASM LAT WALL NASOPHARYNX
CCI	Any malignancy	C11.3	ICD-10-CM	MAL NEOPLASM ANT WALL NASOPHARYNX
CCI	Any malignancy	C11.8	ICD-10-CM	MAL NEOPLASM OVRLAP SITE NASOPHRYNX
CCI	Any malignancy	C11.9	ICD-10-CM	MALIGNANT NEOPLASM NASOPHARYNX UNS
CCI	Any malignancy	C12	ICD-10-CM	MALIGNANT NEOPLASM PYRIFORM SINUS
CCI	Any malignancy	C13	ICD-10-CM	MALIGNANT NEOPLASM OF HYPOPHARYNX
CCI	Any malignancy	C13.0	ICD-10-CM	MAL NEOPLASM OF POSTCRICOID REGION
CCI	Any malignancy	C13.1	ICD-10-CM	MAL NEOPLASM AEF HYPOPHARYNG ASPECT
CCI	Any malignancy	C13.2	ICD-10-CM	MAL NEOPLASM POST WALL HYPOPHARYNX
CCI	Any malignancy	C13.8	ICD-10-CM	MAL NEOPLASM OVRLAP SITE HYPOPHRYNX
CCI	Any malignancy	C13.9	ICD-10-CM	MALIG NEOPLASM OF HYPOPHARYNX UNS
CCI	Any malignancy	C14	ICD-10-CM	MAL NEO OTH ILL-DEF SITE LIP OC PHX
CCI	Any malignancy	C14.0	ICD-10-CM	MALIGNANT NEOPLASM PHARYNX UNSPEC
CCI	Any malignancy	C14.2	ICD-10-CM	MALIGNANT NEOPLSM OF WALDEYERS RING
CCI	Any malignancy	C14.8	ICD-10-CM	MAL NEO OVERLAP SITES LIP OC & PHX
CCI	Any malignancy	C15	ICD-10-CM	MALIGNANT NEOPLASM OF ESOPHAGUS
CCI	Any malignancy	C15.3	ICD-10-CM	MALIG NEOPLASM UPPER 3RD ESOPHAGUS
CCI	Any malignancy	C15.4	ICD-10-CM	MALIG NEOPLASM MIDDLE 3RD ESOPHAGUS
CCI	Any malignancy	C15.5	ICD-10-CM	MALIG NEOPLASM LOWER 3RD ESOPHAGUS
CCI	Any malignancy	C15.8	ICD-10-CM	MALIG NEOPLSM OVERLP SITE ESOPHAGUS
CCI	Any malignancy	C15.9	ICD-10-CM	MALIGNANT NEOPLASM OF ESOPHAGUS UNS
CCI	Any malignancy	C16	ICD-10-CM	MALIGNANT NEOPLASM OF STOMACH
CCI	Any malignancy	C16.0	ICD-10-CM	MALIGNANT NEOPLASM OF CARDIA
CCI	Any malignancy	C16.1	ICD-10-CM	MALIGNANT NEOPLASM FUNDUS STOMACH
CCI	Any malignancy	C16.2	ICD-10-CM	MALIGNANT NEOPLASM BODY STOMACH
CCI	Any malignancy	C16.3	ICD-10-CM	MALIGNANT NEOPLASM PYLORIC ANTRUM
CCI	Any malignancy	C16.4	ICD-10-CM	MALIGNANT NEOPLASM OF PYLORUS
CCI	Any malignancy	C16.5	ICD-10-CM	MAL NEOPLASM LESSR CURV STOMACH UNS
CCI	Any malignancy	C16.6	ICD-10-CM	MAL NEOPLASM GREAT CURV STOMACH UNS
CCI	Any malignancy	C16.8	ICD-10-CM	MAL NEOPLASM OVERLAP SITE STOMACH
CCI	Any malignancy	C16.9	ICD-10-CM	MAL NEOPLASM OF STOMACH UNSPECIFIED
CCI	Any malignancy	C17	ICD-10-CM	MALIGNANT NEOPLASM SMALL INTESTINE
CCI	Any malignancy	C17.0	ICD-10-CM	MALIGNANT NEOPLASM OF DUODENUM
CCI	Any malignancy	C17.1	ICD-10-CM	MALIGNANT NEOPLASM OF JEJUNUM
CCI	Any malignancy	C17.2	ICD-10-CM	MALIGNANT NEOPLASM OF ILEUM
CCI	Any malignancy	C17.3	ICD-10-CM	MECKELS DIVERTICULUM MALIGNANT
CCI	Any malignancy	C17.8	ICD-10-CM	MAL NEOPLASM OVERLAP SITE SM INTEST
CCI	Any malignancy	C17.9	ICD-10-CM	MALIG NEOPLASM SMALL INTESTINE UNS
CCI	Any malignancy	C18	ICD-10-CM	MALIGNANT NEOPLASM OF COLON
CCI	Any malignancy	C18.0	ICD-10-CM	MALIGNANT NEOPLASM OF CECUM
CCI	Any malignancy	C18.1	ICD-10-CM	MALIGNANT NEOPLASM OF APPENDIX
CCI	Any malignancy	C18.2	ICD-10-CM	MALIGNANT NEOPLASM ASCENDING COLON
CCI	Any malignancy	C18.3	ICD-10-CM	MALIGNANT NEOPLASM HEPATIC FLEXURE
CCI	Any malignancy	C18.4	ICD-10-CM	MALIGNANT NEOPLASM TRANSVERSE COLON
CCI	Any malignancy	C18.5	ICD-10-CM	MALIGNANT NEOPLASM SPLENIC FLEXURE
CCI	Any malignancy	C18.6	ICD-10-CM	MALIGNANT NEOPLASM DESCENDING COLON
CCI	Any malignancy	C18.7	ICD-10-CM	MALIGNANT NEOPLASM OF SIGMOID COLON
CCI	Any malignancy	C18.8	ICD-10-CM	MALIG NEOPLASM OVERLAP SITES COLON
CCI	Any malignancy	C18.9	ICD-10-CM	MALIGNANT NEOPLASM OF COLON UNS
CCI	Any malignancy	C19	ICD-10-CM	MAL NEOPLASM RECTOSIGMOID JUNCT
CCI	Any malignancy	C20	ICD-10-CM	MALIGNANT NEOPLASM OF RECTUM
CCI	Any malignancy	C21	ICD-10-CM	MALIGNANT NEOPLASM ANUS ANAL CANAL
CCI	Any malignancy	C21.0	ICD-10-CM	MALIGNANT NEOPLASM ANUS UNSPECIFIED
CCI	Any malignancy	C21.1	ICD-10-CM	MALIGNANT NEOPLASM OF ANAL CANAL
CCI	Any malignancy	C21.2	ICD-10-CM	MALIGNANT NEOPLASM CLOACOGENIC ZONE
CCI	Any malignancy	C21.8	ICD-10-CM	MAL NEO OVRLAP RECT ANUS ANAL CANAL
CCI	Any malignancy	C22	ICD-10-CM	MAL NEOPLASM LIVR NTRAHEP BILE DUCT
CCI	Any malignancy	C22.0	ICD-10-CM	LIVER CELL CARCINOMA
CCI	Any malignancy	C22.1	ICD-10-CM	INTRAHEPATIC BILE DUCT CARCINOMA
CCI	Any malignancy	C22.2	ICD-10-CM	HEPATOBLASTOMA
CCI	Any malignancy	C22.3	ICD-10-CM	ANGIOSARCOMA OF LIVER
CCI	Any malignancy	C22.4	ICD-10-CM	OTHER SARCOMAS OF LIVER
CCI	Any malignancy	C22.7	ICD-10-CM	OTHER SPECIFIED CARCINOMAS OF LIVER
CCI	Any malignancy	C22.8	ICD-10-CM	MAL NEOPLSM LIVER PRIMARY UNS TYPE
CCI	Any malignancy	C22.9	ICD-10-CM	MAL NEOPLSM LIVER NOT SPEC PRIM/SEC
CCI	Any malignancy	C23	ICD-10-CM	MALIGNANT NEOPLASM OF GALLBLADDER
CCI	Any malignancy	C24	ICD-10-CM	MAL NEOPLSM OTH UNS PART BILI TRACT
CCI	Any malignancy	C24.0	ICD-10-CM	MAL NEOPLASM EXTRAHEPATIC BILE DUCT
CCI	Any malignancy	C24.1	ICD-10-CM	MALIG NEOPLASM OF AMPULLA OF VATER
CCI	Any malignancy	C24.8	ICD-10-CM	MAL NEOPLSM OVERLAP SITE BILI TRACT
CCI	Any malignancy	C24.9	ICD-10-CM	MALIG NEOPLASM OF BILIARY TRACT UNS
CCI	Any malignancy	C25	ICD-10-CM	MALIGNANT NEOPLASM OF PANCREAS
CCI	Any malignancy	C25.0	ICD-10-CM	MALIGNANT NEOPLASM HEAD OF PANCREAS
CCI	Any malignancy	C25.1	ICD-10-CM	MALIGNANT NEOPLASM BODY OF PANCREAS
CCI	Any malignancy	C25.2	ICD-10-CM	MALIGNANT NEOPLASM TAIL OF PANCREAS
CCI	Any malignancy	C25.3	ICD-10-CM	MALIGNANT NEOPLASM PANCREATIC DUCT
CCI	Any malignancy	C25.4	ICD-10-CM	MALIGNANT NEOPLA ENDOCRINE PANCREAS
CCI	Any malignancy	C25.7	ICD-10-CM	MALIG NEOPLASM OTH PARTS PANCREAS
CCI	Any malignancy	C25.8	ICD-10-CM	MALIG NEOPLASM OVERLP SITE PANCREAS
CCI	Any malignancy	C25.9	ICD-10-CM	MALIGNANT NEOPLASM OF PANCREAS UNS
CCI	Any malignancy	C26	ICD-10-CM	MAL NEOPLASM OTH ILL-DEF DIGST ORGN
CCI	Any malignancy	C26.0	ICD-10-CM	MAL NEOPLASM INTEST TRACT PART UNS
CCI	Any malignancy	C26.1	ICD-10-CM	MALIGNANT NEOPLASM OF SPLEEN
CCI	Any malignancy	C26.9	ICD-10-CM	MAL NEO ILL-DEFIND SITE DIGESTV SYS
CCI	Any malignancy	C30	ICD-10-CM	MALIG NEOPLASM NASAL CAV & MID EAR
CCI	Any malignancy	C30.0	ICD-10-CM	MALIGNANT NEOPLASM OF NASAL CAVITY
CCI	Any malignancy	C30.1	ICD-10-CM	MALIGNANT NEOPLASM OF MIDDLE EAR
CCI	Any malignancy	C31	ICD-10-CM	MALIGNANT NEOPLASM ACCESSRY SINUSES
CCI	Any malignancy	C31.0	ICD-10-CM	MALIGNANT NEOPLASM MAXILLARY SINUS
CCI	Any malignancy	C31.1	ICD-10-CM	MALIGNANT NEOPLASM ETHMOIDAL SINUS
CCI	Any malignancy	C31.2	ICD-10-CM	MALIGNANT NEOPLASM OF FRONTAL SINUS
CCI	Any malignancy	C31.3	ICD-10-CM	MALIGNANT NEOPLASM SPHENOID SINUS
CCI	Any malignancy	C31.8	ICD-10-CM	MALIG NEO OVERLP SITE ACCSS SINUSES
CCI	Any malignancy	C31.9	ICD-10-CM	MALIG NEOPLASM ACCESSORY SINUS UNS
CCI	Any malignancy	C32	ICD-10-CM	MALIGNANT NEOPLASM OF LARYNX
CCI	Any malignancy	C32.0	ICD-10-CM	MALIGNANT NEOPLASM OF GLOTTIS
CCI	Any malignancy	C32.1	ICD-10-CM	MALIGNANT NEOPLASM OF SUPRAGLOTTIS
CCI	Any malignancy	C32.2	ICD-10-CM	MALIGNANT NEOPLASM OF SUBGLOTTIS
CCI	Any malignancy	C32.3	ICD-10-CM	MALIG NEOPLASM LARYNGEAL CARTILAGE
CCI	Any malignancy	C32.8	ICD-10-CM	MALIG NEOPLASM OVERLAP SITE LARYNX
CCI	Any malignancy	C32.9	ICD-10-CM	MALIGNANT NEOPLASM LARYNX UNS
CCI	Any malignancy	C33	ICD-10-CM	MALIGNANT NEOPLASM OF TRACHEA
CCI	Any malignancy	C34	ICD-10-CM	MALIGNANT NEOPLASM BRONCHUS & LUNG
CCI	Any malignancy	C34.0	ICD-10-CM	MALIGNANT NEOPLASM OF MAIN BRONCHUS
CCI	Any malignancy	C34.00	ICD-10-CM	MALIGNANT NEOPLSM UNS MAIN BRONCHUS
CCI	Any malignancy	C34.01	ICD-10-CM	MALIGNANT NEOPLASM RT MAIN BRONCHUS
CCI	Any malignancy	C34.02	ICD-10-CM	MALIGNANT NEOPLASM LT MAIN BRONCHUS
CCI	Any malignancy	C34.1	ICD-10-CM	MAL NEOPLASM UP LOBE BRONCHUS/LUNG
CCI	Any malignancy	C34.10	ICD-10-CM	MAL NEOPLASM UP LOBE UNS BRON/LUNG
CCI	Any malignancy	C34.11	ICD-10-CM	MAL NEOPLASM UP LOBE RT BRONCH/LUNG
CCI	Any malignancy	C34.12	ICD-10-CM	MAL NEOPLASM UP LOBE LT BRONCH/LUNG
CCI	Any malignancy	C34.2	ICD-10-CM	MAL NEOPLASM MID LOBE BRONCH/LUNG
CCI	Any malignancy	C34.3	ICD-10-CM	MAL NEOPLASM LOW LOBE BRONCH/LUNG
CCI	Any malignancy	C34.30	ICD-10-CM	MAL NEOPLASM LW LOBE UNS BRON/LUNG
CCI	Any malignancy	C34.31	ICD-10-CM	MAL NEOPLASM LW LOBE RT BRONCH/LUNG
CCI	Any malignancy	C34.32	ICD-10-CM	MAL NEOPLASM LW LOBE LT BRONCH/LUNG
CCI	Any malignancy	C34.8	ICD-10-CM	MAL NEOPLSM OVRLAP SITE BRONCH LUNG
CCI	Any malignancy	C34.80	ICD-10-CM	MAL NEO OVRLAP SITE UNS BRONCH LUNG
CCI	Any malignancy	C34.81	ICD-10-CM	MAL NEO OVERLAP SITE RT BRONCH LUNG
CCI	Any malignancy	C34.82	ICD-10-CM	MAL NEO OVERLAP SITE LT BRONCH LUNG
CCI	Any malignancy	C34.9	ICD-10-CM	MALIG NEOPLASM UNS PART BRONCH/LUNG
CCI	Any malignancy	C34.90	ICD-10-CM	MALIG NEO UNS PART UNS BRONCH/LUNG
CCI	Any malignancy	C34.91	ICD-10-CM	MALIG NEO UNS PART RT BRONCHU/LUNG
CCI	Any malignancy	C34.92	ICD-10-CM	MALIG NEO UNS PART LT BRONCH/LUNG
CCI	Any malignancy	C37	ICD-10-CM	MALIGNANT NEOPLASM OF THYMUS
CCI	Any malignancy	C38	ICD-10-CM	MALIG NEOPLASM HEART MEDIAST PLEURA
CCI	Any malignancy	C38.0	ICD-10-CM	MALIGNANT NEOPLASM OF HEART
CCI	Any malignancy	C38.1	ICD-10-CM	MALIGNANT NEOPLASM ANT MEDIASTINUM
CCI	Any malignancy	C38.2	ICD-10-CM	MALIGNANT NEOPLASM POST MEDIASTINUM
CCI	Any malignancy	C38.3	ICD-10-CM	MAL NEOPLASM MEDIASTINUM PART UNS
CCI	Any malignancy	C38.4	ICD-10-CM	MALIGNANT NEOPLASM OF PLEURA
CCI	Any malignancy	C38.8	ICD-10-CM	MAL NEO OVRLAP HEART MEDIAST PLEURA
CCI	Any malignancy	C39	ICD-10-CM	MAL NEO OTH ILL-DF SITE RESP IT ORG
CCI	Any malignancy	C39.0	ICD-10-CM	MAL NEOPLASM UP RESP TRACT PART UNS
CCI	Any malignancy	C39.9	ICD-10-CM	MAL NEOPLASM LW RESP TRACT PART UNS
CCI	Any malignancy	C40	ICD-10-CM	MAL NEOPLASM BONE ARTICLR CART LIMB
CCI	Any malignancy	C40.0	ICD-10-CM	MALIG NEOPLSM SCAP LNG BONE UP LIMB
CCI	Any malignancy	C40.00	ICD-10-CM	MAL NEO SCAP LONG BONES UNS UP LIMB
CCI	Any malignancy	C40.01	ICD-10-CM	MAL NEO SCAP LONG BONES RT UP LIMB
CCI	Any malignancy	C40.02	ICD-10-CM	MAL NEO SCAP LONG BONES LT UP LIMB
CCI	Any malignancy	C40.1	ICD-10-CM	MAL NEOPLASM OF SHORT BONES UP LIMB
CCI	Any malignancy	C40.10	ICD-10-CM	MAL NEOPLASM SHRT BONES UNS UP LIMB
CCI	Any malignancy	C40.11	ICD-10-CM	MAL NEOPLASM SHORT BONES RT UP LIMB
CCI	Any malignancy	C40.12	ICD-10-CM	MAL NEOPLASM SHORT BONES LT UP LIMB
CCI	Any malignancy	C40.2	ICD-10-CM	MALIG NEOPLASM LONG BONES LOW LIMB
CCI	Any malignancy	C40.20	ICD-10-CM	MAL NEOPLASM LONG BONES UNS LW LIMB
CCI	Any malignancy	C40.21	ICD-10-CM	MAL NEOPLASM LONG BONES RT LOW LIMB
CCI	Any malignancy	C40.22	ICD-10-CM	MAL NEOPLASM LONG BONES LT LOW LIMB
CCI	Any malignancy	C40.3	ICD-10-CM	MALIG NEOPLASM SHORT BONES LOW LIMB
CCI	Any malignancy	C40.30	ICD-10-CM	MAL NEOPLASM SHORT BONE UNS LW LIMB
CCI	Any malignancy	C40.31	ICD-10-CM	MAL NEOPLASM SHORT BONES RT LW LIMB
CCI	Any malignancy	C40.32	ICD-10-CM	MAL NEOPLASM SHORT BONES LT LW LIMB
CCI	Any malignancy	C40.8	ICD-10-CM	MAL NEO OVERLAP SITE BONE & AC LIMB
CCI	Any malignancy	C40.80	ICD-10-CM	MAL NEO OVERLP SITE BN AC UNS LIMB
CCI	Any malignancy	C40.81	ICD-10-CM	MAL NEO OVRLAP SITE BONE AC RT LIMB
CCI	Any malignancy	C40.82	ICD-10-CM	MAL NEO OVRLAP SITE BONE AC LT LIMB
CCI	Any malignancy	C40.9	ICD-10-CM	MALIG NEOPLASM UNS BONES AC LIMB
CCI	Any malignancy	C40.90	ICD-10-CM	MAL NEOPLASM UNS BONES AC UNS LIMB
CCI	Any malignancy	C40.91	ICD-10-CM	MAL NEO OVRLAP SITE BONE AC RT LIMB
CCI	Any malignancy	C40.92	ICD-10-CM	MAL NEO OVRLAP SITE BONE AC LT LIMB
CCI	Any malignancy	C41	ICD-10-CM	MAL NEO BONE & AC OTH & UNS SITES
CCI	Any malignancy	C41.0	ICD-10-CM	MAL NEOPLASM BONES SKULL & FACE
CCI	Any malignancy	C41.1	ICD-10-CM	MALIGNANT NEOPLASM OF MANDIBLE
CCI	Any malignancy	C41.2	ICD-10-CM	MALIGNANT NEOPLASM VERTEBRL COLUMN
CCI	Any malignancy	C41.3	ICD-10-CM	MALIG NEOPLSM RIBS STERNUM CLAVICLE
CCI	Any malignancy	C41.4	ICD-10-CM	MALIG NEO PELV BONES SACRUM COCCYX
CCI	Any malignancy	C41.9	ICD-10-CM	MALIGNANT NEOPLSM BONE & AC UNS
CCI	Any malignancy	C43	ICD-10-CM	MALIGNANT MELANOMA OF SKIN
CCI	Any malignancy	C43.0	ICD-10-CM	MALIGNANT MELANOMA OF LIP
CCI	Any malignancy	C43.1	ICD-10-CM	MALIG MELANOMA EYELID INCL CANTHUS
CCI	Any malignancy	C43.10	ICD-10-CM	MAL MELANOMA UNS EYELD INCL CANTHUS
CCI	Any malignancy	C43.11	ICD-10-CM	MAL MELANOMA RT EYELID INCL CANTHUS
CCI	Any malignancy	C43.111	ICD-10-CM	MAL MELANOMA RT UP EYELD W/CANTHUS
CCI	Any malignancy	C43.112	ICD-10-CM	MAL MELANOMA RT LOW EYELD W/CANTHUS
CCI	Any malignancy	C43.12	ICD-10-CM	MAL MELANOMA LT EYELID INCL CANTHUS
CCI	Any malignancy	C43.121	ICD-10-CM	MAL MELANOMA LT UP EYELD W/CANTHUS
CCI	Any malignancy	C43.122	ICD-10-CM	MAL MELANOMA LT LOW EYELD W/CANTHUS
CCI	Any malignancy	C43.2	ICD-10-CM	MALIG MELANOMA EAR & EXT AUR CANAL
CCI	Any malignancy	C43.20	ICD-10-CM	MAL MELANOMA UNS EAR & EXT AUR CANL
CCI	Any malignancy	C43.21	ICD-10-CM	MAL MELANOMA RT EAR & EXT AUR CANAL
CCI	Any malignancy	C43.22	ICD-10-CM	MAL MELANOMA LT EAR & EXT AUR CANAL
CCI	Any malignancy	C43.3	ICD-10-CM	MALIG MELANOMA OTH & UNS PARTS FACE
CCI	Any malignancy	C43.30	ICD-10-CM	MALIGNANT MELANOMA OF UNS PART FACE
CCI	Any malignancy	C43.31	ICD-10-CM	MALIGNANT MELANOMA OF NOSE
CCI	Any malignancy	C43.39	ICD-10-CM	MALIGNANT MELANOMA OTHER PARTS FACE
CCI	Any malignancy	C43.4	ICD-10-CM	MALIGNANT MELANOMA SCALP AND NECK
CCI	Any malignancy	C43.5	ICD-10-CM	MALIGNANT MELANOMA OF TRUNK
CCI	Any malignancy	C43.51	ICD-10-CM	MALIGNANT MELANOMA OF ANAL SKIN
CCI	Any malignancy	C43.52	ICD-10-CM	MALIGNANT MELANOMA SKIN OF BREAST
CCI	Any malignancy	C43.59	ICD-10-CM	MALIGNANT MELANOMA OTHER PART TRUNK
CCI	Any malignancy	C43.6	ICD-10-CM	MAL MELANOMA UP LIMB INCL SHOULDER
CCI	Any malignancy	C43.60	ICD-10-CM	MAL MELANOMA UNS UP LMB INCL SHLDER
CCI	Any malignancy	C43.61	ICD-10-CM	MAL MELANOMA RT UP LIMB INCL SHLDER
CCI	Any malignancy	C43.62	ICD-10-CM	MAL MELANOMA LT UP LIMB INCL SHLDER
CCI	Any malignancy	C43.7	ICD-10-CM	MALIG MELANOMA LOW LIMB INCL HIP
CCI	Any malignancy	C43.70	ICD-10-CM	MALIG MELANOMA UNS LW LIMB INCL HIP
CCI	Any malignancy	C43.71	ICD-10-CM	MALIG MELANOMA RT LOW LIMB INCL HIP
CCI	Any malignancy	C43.72	ICD-10-CM	MALIG MELANOMA LT LOW LIMB INCL HIP
CCI	Any malignancy	C43.8	ICD-10-CM	MAL MELANOMA OVERLAP SITE OF SKIN
CCI	Any malignancy	C43.9	ICD-10-CM	MALIGNANT MELANOMA OF SKIN UNSPEC
CCI	Any malignancy	C44	ICD-10-CM	OTHER UNS MALIGNANT NEOPLASM SKIN
CCI	Any malignancy	C44.0	ICD-10-CM	OTHER & UNS MAL NEOPLASM SKIN LIP
CCI	Any malignancy	C44.00	ICD-10-CM	UNSPEC MALIGNANT NEOPLASM SKIN LIP
CCI	Any malignancy	C44.01	ICD-10-CM	BASAL CELL CARCINOMA OF SKIN OF LIP
CCI	Any malignancy	C44.02	ICD-10-CM	SQUAMOUS CELL CARCINOMA SKIN OF LIP
CCI	Any malignancy	C44.09	ICD-10-CM	OTHER SPEC MALIG NEOPLASM SKIN LIP
CCI	Any malignancy	C44.1	ICD-10-CM	Other and unspecified malignant neoplasm of skin of eyelid, including canthus
CCI	Any malignancy	C44.10	ICD-10-CM	Unspecified malignant neoplasm of skin of eyelid, including canthus
CCI	Any malignancy	C44.101	ICD-10-CM	Unspecified malignant neoplasm of skin of unspecified eyelid, including canthus
CCI	Any malignancy	C44.102	ICD-10-CM	Unspecified malignant neoplasm of skin of right eyelid, including canthus
CCI	Any malignancy	C44.1021	ICD-10-CM	Unspecified malignant neoplasm of skin of right upper eyelid, including canthus
CCI	Any malignancy	C44.1022	ICD-10-CM	Unspecified malignant neoplasm of skin of right lower eyelid, including canthus
CCI	Any malignancy	C44.109	ICD-10-CM	Unspecified malignant neoplasm of skin of left eyelid, including canthus
CCI	Any malignancy	C44.1091	ICD-10-CM	Unspecified malignant neoplasm of skin of left upper eyelid, including canthus
CCI	Any malignancy	C44.1092	ICD-10-CM	Unspecified malignant neoplasm of skin of left lower eyelid, including canthus
CCI	Any malignancy	C44.11	ICD-10-CM	Basal cell carcinoma of skin of eyelid, including canthus
CCI	Any malignancy	C44.111	ICD-10-CM	Basal cell carcinoma of skin of unspecified eyelid, including canthus
CCI	Any malignancy	C44.112	ICD-10-CM	Basal cell carcinoma of skin of right eyelid, including canthus
CCI	Any malignancy	C44.1121	ICD-10-CM	Basal cell carcinoma of skin of right upper eyelid, including canthus
CCI	Any malignancy	C44.1122	ICD-10-CM	Basal cell carcinoma of skin of right lower eyelid, including canthus
CCI	Any malignancy	C44.119	ICD-10-CM	Basal cell carcinoma of skin of left eyelid, including canthus
CCI	Any malignancy	C44.1191	ICD-10-CM	Basal cell carcinoma of skin of left upper eyelid, including canthus
CCI	Any malignancy	C44.1192	ICD-10-CM	Basal cell carcinoma of skin of left lower eyelid, including canthus
CCI	Any malignancy	C44.12	ICD-10-CM	Squamous cell carcinoma of skin of eyelid, including canthus
CCI	Any malignancy	C44.121	ICD-10-CM	Squamous cell carcinoma of skin of unspecified eyelid, including canthus
CCI	Any malignancy	C44.122	ICD-10-CM	Squamous cell carcinoma of skin of right eyelid, including canthus
CCI	Any malignancy	C44.1221	ICD-10-CM	Squamous cell carcinoma of skin of right upper eyelid, including canthus
CCI	Any malignancy	C44.1222	ICD-10-CM	Squamous cell carcinoma of skin of right lower eyelid, including canthus
CCI	Any malignancy	C44.129	ICD-10-CM	Squamous cell carcinoma of skin of left eyelid, including canthus
CCI	Any malignancy	C44.1291	ICD-10-CM	Squamous cell carcinoma of skin of left upper eyelid, including canthus
CCI	Any malignancy	C44.1292	ICD-10-CM	Squamous cell carcinoma of skin of left lower eyelid, including canthus
CCI	Any malignancy	C44.13	ICD-10-CM	Sebaceous cell carcinoma of skin of eyelid, including canthus
CCI	Any malignancy	C44.131	ICD-10-CM	Sebaceous cell carcinoma of skin of unspecified eyelid, including canthus
CCI	Any malignancy	C44.132	ICD-10-CM	Sebaceous cell carcinoma of skin of right eyelid, including canthus
CCI	Any malignancy	C44.1321	ICD-10-CM	Sebaceous cell carcinoma of skin of right upper eyelid, including canthus
CCI	Any malignancy	C44.1322	ICD-10-CM	Sebaceous cell carcinoma of skin of right lower eyelid, including canthus
CCI	Any malignancy	C44.139	ICD-10-CM	Sebaceous cell carcinoma of skin of left eyelid, including canthus
CCI	Any malignancy	C44.1391	ICD-10-CM	Sebaceous cell carcinoma of skin of left upper eyelid, including canthus
CCI	Any malignancy	C44.1392	ICD-10-CM	Sebaceous cell carcinoma of skin of left lower eyelid, including canthus
CCI	Any malignancy	C44.19	ICD-10-CM	Other specified malignant neoplasm of skin of eyelid, including canthus
CCI	Any malignancy	C44.191	ICD-10-CM	Other specified malignant neoplasm of skin of unspecified eyelid, including canthus
CCI	Any malignancy	C44.192	ICD-10-CM	Other specified malignant neoplasm of skin of right eyelid, including canthus
CCI	Any malignancy	C44.1921	ICD-10-CM	Other specified malignant neoplasm of skin of right upper eyelid, including canthus
CCI	Any malignancy	C44.1922	ICD-10-CM	Other specified malignant neoplasm of skin of right lower eyelid, including canthus
CCI	Any malignancy	C44.199	ICD-10-CM	Other specified malignant neoplasm of skin of left eyelid, including canthus
CCI	Any malignancy	C44.1991	ICD-10-CM	Other specified malignant neoplasm of skin of left upper eyelid, including canthus
CCI	Any malignancy	C44.1992	ICD-10-CM	Other specified malignant neoplasm of skin of left lower eyelid, including canthus
CCI	Any malignancy	C44.2	ICD-10-CM	Other and unspecified malignant neoplasm of skin of ear and external auricular canal
CCI	Any malignancy	C44.20	ICD-10-CM	Unspecified malignant neoplasm of skin of ear and external auricular canal
CCI	Any malignancy	C44.201	ICD-10-CM	Unspecified malignant neoplasm of skin of unspecified ear and external auricular canal
CCI	Any malignancy	C44.202	ICD-10-CM	Unspecified malignant neoplasm of skin of right ear and external auricular canal
CCI	Any malignancy	C44.209	ICD-10-CM	Unspecified malignant neoplasm of skin of left ear and external auricular canal
CCI	Any malignancy	C44.21	ICD-10-CM	Basal cell carcinoma of skin of ear and external auricular canal
CCI	Any malignancy	C44.211	ICD-10-CM	Basal cell carcinoma of skin of unspecified ear and external auricular canal
CCI	Any malignancy	C44.212	ICD-10-CM	Basal cell carcinoma of skin of right ear and external auricular canal
CCI	Any malignancy	C44.219	ICD-10-CM	Basal cell carcinoma of skin of left ear and external auricular canal
CCI	Any malignancy	C44.22	ICD-10-CM	Squamous cell carcinoma of skin of ear and external auricular canal
CCI	Any malignancy	C44.221	ICD-10-CM	Squamous cell carcinoma of skin of unspecified ear and external auricular canal
CCI	Any malignancy	C44.222	ICD-10-CM	Squamous cell carcinoma of skin of right ear and external auricular canal
CCI	Any malignancy	C44.229	ICD-10-CM	Squamous cell carcinoma of skin of left ear and external auricular canal
CCI	Any malignancy	C44.29	ICD-10-CM	Other specified malignant neoplasm of skin of ear and external auricular canal
CCI	Any malignancy	C44.291	ICD-10-CM	Other specified malignant neoplasm of skin of unspecified ear and external auricular canal
CCI	Any malignancy	C44.292	ICD-10-CM	Other specified malignant neoplasm of skin of right ear and external auricular canal
CCI	Any malignancy	C44.299	ICD-10-CM	Other specified malignant neoplasm of skin of left ear and external auricular canal
CCI	Any malignancy	C44.3	ICD-10-CM	Other and unspecified malignant neoplasm of skin of other and unspecified parts of face
CCI	Any malignancy	C44.30	ICD-10-CM	Unspecified malignant neoplasm of skin of other and unspecified parts of face
CCI	Any malignancy	C44.300	ICD-10-CM	Unspecified malignant neoplasm of skin of unspecified part of face
CCI	Any malignancy	C44.301	ICD-10-CM	Unspecified malignant neoplasm of skin of nose
CCI	Any malignancy	C44.309	ICD-10-CM	Unspecified malignant neoplasm of skin of other parts of face
CCI	Any malignancy	C44.31	ICD-10-CM	Basal cell carcinoma of skin of other and unspecified parts of face
CCI	Any malignancy	C44.310	ICD-10-CM	Basal cell carcinoma of skin of unspecified parts of face
CCI	Any malignancy	C44.311	ICD-10-CM	Basal cell carcinoma of skin of nose
CCI	Any malignancy	C44.319	ICD-10-CM	Basal cell carcinoma of skin of other parts of face
CCI	Any malignancy	C44.32	ICD-10-CM	Squamous cell carcinoma of skin of other and unspecified parts of face
CCI	Any malignancy	C44.320	ICD-10-CM	Squamous cell carcinoma of skin of unspecified parts of face
CCI	Any malignancy	C44.321	ICD-10-CM	Squamous cell carcinoma of skin of nose
CCI	Any malignancy	C44.329	ICD-10-CM	Squamous cell carcinoma of skin of other parts of face
CCI	Any malignancy	C44.39	ICD-10-CM	Other specified malignant neoplasm of skin of other and unspecified parts of face
CCI	Any malignancy	C44.390	ICD-10-CM	Other specified malignant neoplasm of skin of unspecified parts of face
CCI	Any malignancy	C44.391	ICD-10-CM	Other specified malignant neoplasm of skin of nose
CCI	Any malignancy	C44.399	ICD-10-CM	Other specified malignant neoplasm of skin of other parts of face
CCI	Any malignancy	C44.4	ICD-10-CM	Other and unspecified malignant neoplasm of skin of scalp and neck
CCI	Any malignancy	C44.40	ICD-10-CM	Unspecified malignant neoplasm of skin of scalp and neck
CCI	Any malignancy	C44.41	ICD-10-CM	Basal cell carcinoma of skin of scalp and neck
CCI	Any malignancy	C44.42	ICD-10-CM	Squamous cell carcinoma of skin of scalp and neck
CCI	Any malignancy	C44.49	ICD-10-CM	Other specified malignant neoplasm of skin of scalp and neck
CCI	Any malignancy	C44.5	ICD-10-CM	Other and unspecified malignant neoplasm of skin of trunk
CCI	Any malignancy	C44.50	ICD-10-CM	Unspecified malignant neoplasm of skin of trunk
CCI	Any malignancy	C44.500	ICD-10-CM	Unspecified malignant neoplasm of anal skin
CCI	Any malignancy	C44.501	ICD-10-CM	Unspecified malignant neoplasm of skin of breast
CCI	Any malignancy	C44.509	ICD-10-CM	Unspecified malignant neoplasm of skin of other part of trunk
CCI	Any malignancy	C44.51	ICD-10-CM	Basal cell carcinoma of skin of trunk
CCI	Any malignancy	C44.510	ICD-10-CM	Basal cell carcinoma of anal skin
CCI	Any malignancy	C44.511	ICD-10-CM	Basal cell carcinoma of skin of breast
CCI	Any malignancy	C44.519	ICD-10-CM	Basal cell carcinoma of skin of other part of trunk
CCI	Any malignancy	C44.52	ICD-10-CM	Squamous cell carcinoma of skin of trunk
CCI	Any malignancy	C44.520	ICD-10-CM	Squamous cell carcinoma of anal skin
CCI	Any malignancy	C44.521	ICD-10-CM	Squamous cell carcinoma of skin of breast
CCI	Any malignancy	C44.529	ICD-10-CM	Squamous cell carcinoma of skin of other part of trunk
CCI	Any malignancy	C44.59	ICD-10-CM	Other specified malignant neoplasm of skin of trunk
CCI	Any malignancy	C44.590	ICD-10-CM	Other specified malignant neoplasm of anal skin
CCI	Any malignancy	C44.591	ICD-10-CM	Other specified malignant neoplasm of skin of breast
CCI	Any malignancy	C44.599	ICD-10-CM	Other specified malignant neoplasm of skin of other part of trunk
CCI	Any malignancy	C44.6	ICD-10-CM	Other and unspecified malignant neoplasm of skin of upper limb, including shoulder
CCI	Any malignancy	C44.60	ICD-10-CM	Unspecified malignant neoplasm of skin of upper limb, including shoulder
CCI	Any malignancy	C44.601	ICD-10-CM	Unspecified malignant neoplasm of skin of unspecified upper limb, including shoulder
CCI	Any malignancy	C44.602	ICD-10-CM	Unspecified malignant neoplasm of skin of right upper limb, including shoulder
CCI	Any malignancy	C44.609	ICD-10-CM	Unspecified malignant neoplasm of skin of left upper limb, including shoulder
CCI	Any malignancy	C44.61	ICD-10-CM	Basal cell carcinoma of skin of upper limb, including shoulder
CCI	Any malignancy	C44.611	ICD-10-CM	Basal cell carcinoma of skin of unspecified upper limb, including shoulder
CCI	Any malignancy	C44.612	ICD-10-CM	Basal cell carcinoma of skin of right upper limb, including shoulder
CCI	Any malignancy	C44.619	ICD-10-CM	Basal cell carcinoma of skin of left upper limb, including shoulder
CCI	Any malignancy	C44.62	ICD-10-CM	Squamous cell carcinoma of skin of upper limb, including shoulder
CCI	Any malignancy	C44.621	ICD-10-CM	Squamous cell carcinoma of skin of unspecified upper limb, including shoulder
CCI	Any malignancy	C44.622	ICD-10-CM	Squamous cell carcinoma of skin of right upper limb, including shoulder
CCI	Any malignancy	C44.629	ICD-10-CM	Squamous cell carcinoma of skin of left upper limb, including shoulder
CCI	Any malignancy	C44.69	ICD-10-CM	Other specified malignant neoplasm of skin of upper limb, including shoulder
CCI	Any malignancy	C44.691	ICD-10-CM	Other specified malignant neoplasm of skin of unspecified upper limb, including shoulder
CCI	Any malignancy	C44.692	ICD-10-CM	Other specified malignant neoplasm of skin of right upper limb, including shoulder
CCI	Any malignancy	C44.699	ICD-10-CM	Other specified malignant neoplasm of skin of left upper limb, including shoulder
CCI	Any malignancy	C44.7	ICD-10-CM	Other and unspecified malignant neoplasm of skin of lower limb, including hip
CCI	Any malignancy	C44.70	ICD-10-CM	Unspecified malignant neoplasm of skin of lower limb, including hip
CCI	Any malignancy	C44.701	ICD-10-CM	Unspecified malignant neoplasm of skin of unspecified lower limb, including hip
CCI	Any malignancy	C44.702	ICD-10-CM	Unspecified malignant neoplasm of skin of right lower limb, including hip
CCI	Any malignancy	C44.709	ICD-10-CM	Unspecified malignant neoplasm of skin of left lower limb, including hip
CCI	Any malignancy	C44.71	ICD-10-CM	Basal cell carcinoma of skin of lower limb, including hip
CCI	Any malignancy	C44.711	ICD-10-CM	Basal cell carcinoma of skin of unspecified lower limb, including hip
CCI	Any malignancy	C44.712	ICD-10-CM	Basal cell carcinoma of skin of right lower limb, including hip
CCI	Any malignancy	C44.719	ICD-10-CM	Basal cell carcinoma of skin of left lower limb, including hip
CCI	Any malignancy	C44.72	ICD-10-CM	Squamous cell carcinoma of skin of lower limb, including hip
CCI	Any malignancy	C44.721	ICD-10-CM	Squamous cell carcinoma of skin of unspecified lower limb, including hip
CCI	Any malignancy	C44.722	ICD-10-CM	Squamous cell carcinoma of skin of right lower limb, including hip
CCI	Any malignancy	C44.729	ICD-10-CM	Squamous cell carcinoma of skin of left lower limb, including hip
CCI	Any malignancy	C44.79	ICD-10-CM	Other specified malignant neoplasm of skin of lower limb, including hip
CCI	Any malignancy	C44.791	ICD-10-CM	Other specified malignant neoplasm of skin of unspecified lower limb, including hip
CCI	Any malignancy	C44.792	ICD-10-CM	Other specified malignant neoplasm of skin of right lower limb, including hip
CCI	Any malignancy	C44.799	ICD-10-CM	Other specified malignant neoplasm of skin of left lower limb, including hip
CCI	Any malignancy	C44.8	ICD-10-CM	Other and unspecified malignant neoplasm of overlapping sites of skin
CCI	Any malignancy	C44.80	ICD-10-CM	Unspecified malignant neoplasm of overlapping sites of skin
CCI	Any malignancy	C44.81	ICD-10-CM	Basal cell carcinoma of overlapping sites of skin
CCI	Any malignancy	C44.82	ICD-10-CM	Squamous cell carcinoma of overlapping sites of skin
CCI	Any malignancy	C44.89	ICD-10-CM	Other specified malignant neoplasm of overlapping sites of skin
CCI	Any malignancy	C44.9	ICD-10-CM	Other and unspecified malignant neoplasm of skin, unspecified
CCI	Any malignancy	C44.90	ICD-10-CM	Unspecified malignant neoplasm of skin, unspecified
CCI	Any malignancy	C44.91	ICD-10-CM	Basal cell carcinoma of skin, unspecified
CCI	Any malignancy	C44.92	ICD-10-CM	Squamous cell carcinoma of skin, unspecified
CCI	Any malignancy	C44.99	ICD-10-CM	Other specified malignant neoplasm of skin, unspecified
CCI	Any malignancy	C45	ICD-10-CM	MESOTHELIOMA
CCI	Any malignancy	C45.0	ICD-10-CM	MESOTHELIOMA OF PLEURA
CCI	Any malignancy	C45.1	ICD-10-CM	MESOTHELIOMA OF PERITONEUM
CCI	Any malignancy	C45.2	ICD-10-CM	MESOTHELIOMA OF PERICARDIUM
CCI	Any malignancy	C45.7	ICD-10-CM	MESOTHELIOMA OF OTHER SITES
CCI	Any malignancy	C45.9	ICD-10-CM	MESOTHELIOMA UNSPECIFIED
CCI	Any malignancy	C46	ICD-10-CM	KAPOSIS SARCOMA
CCI	Any malignancy	C46.0	ICD-10-CM	KAPOSIS SARCOMA OF SKIN
CCI	Any malignancy	C46.1	ICD-10-CM	KAPOSIS SARCOMA OF SOFT TISSUE
CCI	Any malignancy	C46.2	ICD-10-CM	KAPOSIS SARCOMA OF PALATE
CCI	Any malignancy	C46.3	ICD-10-CM	KAPOSIS SARCOMA OF LYMPH NODES
CCI	Any malignancy	C46.4	ICD-10-CM	KAPOSIS SARCOMA OF GI SITES
CCI	Any malignancy	C46.5	ICD-10-CM	KAPOSIS SARCOMA OF LUNG
CCI	Any malignancy	C46.50	ICD-10-CM	KAPOSIS SARCOMA UNSPECIFIED LUNG
CCI	Any malignancy	C46.51	ICD-10-CM	KAPOSIS SARCOMA OF RIGHT LUNG
CCI	Any malignancy	C46.52	ICD-10-CM	KAPOSIS SARCOMA OF LEFT LUNG
CCI	Any malignancy	C46.7	ICD-10-CM	KAPOSIS SARCOMA OF OTHER SITES
CCI	Any malignancy	C46.9	ICD-10-CM	KAPOSIS SARCOMA UNSPECIFIED
CCI	Any malignancy	C47	ICD-10-CM	MAL NEOPLASM PERIPH NERVES & ANS
CCI	Any malignancy	C47.0	ICD-10-CM	MAL NEO PERIPH NERV HEAD FACE NECK
CCI	Any malignancy	C47.1	ICD-10-CM	MAL NEO PERIPH NERV UP LIMB W/SHLDR
CCI	Any malignancy	C47.10	ICD-10-CM	MAL NEO P NERVE UP LIMB W/SHLDR UNS
CCI	Any malignancy	C47.11	ICD-10-CM	MAL NEO P NERVE RT UP LIMB W/SHLDR
CCI	Any malignancy	C47.12	ICD-10-CM	MAL NEO P NERVE LT UP LIMB W/SHLDR
CCI	Any malignancy	C47.2	ICD-10-CM	MAL NEO PERIPH NERV LOW LIMB W/HIP
CCI	Any malignancy	C47.20	ICD-10-CM	MAL NEO P NERVE LOW LIMB W/HIP UNS
CCI	Any malignancy	C47.21	ICD-10-CM	MAL NEO P NERVE RT LOW LIMB W/HIP
CCI	Any malignancy	C47.22	ICD-10-CM	MAL NEO P NERVE LT LOW LIMB W/HIP
CCI	Any malignancy	C47.3	ICD-10-CM	MAL NEOPLASM PERIPH NERVES THORAX
CCI	Any malignancy	C47.4	ICD-10-CM	MAL NEOPLASM PERIPH NERVES ABDOMEN
CCI	Any malignancy	C47.5	ICD-10-CM	MAL NEOPLASM PERIPH NERVES PELVIS
CCI	Any malignancy	C47.6	ICD-10-CM	MAL NEOPLASM PERIPH NERV TRUNK UNS
CCI	Any malignancy	C47.8	ICD-10-CM	MAL NEO OVERLAP SITES P NERVE & ANS
CCI	Any malignancy	C47.9	ICD-10-CM	MAL NEOPLSM PERIPH NERVES & ANS UNS
CCI	Any malignancy	C48	ICD-10-CM	MAL NEO RETROPERITONEUM & PERITON
CCI	Any malignancy	C48.0	ICD-10-CM	MALIGNANT NEOPLASM RETROPERITONEUM
CCI	Any malignancy	C48.1	ICD-10-CM	MAL NEOPLASM SPEC PARTS PERITONEUM
CCI	Any malignancy	C48.2	ICD-10-CM	MALIGNANT NEOPLASM PERITONEUM UNS
CCI	Any malignancy	C48.8	ICD-10-CM	MAL NEO OVERLAP SITES RP & PERITON
CCI	Any malignancy	C49	ICD-10-CM	MAL NEOPLASM OTH CONN & SOFT TISS
CCI	Any malignancy	C49.0	ICD-10-CM	MAL NEO CONN SOFT TISS HEAD NECK
CCI	Any malignancy	C49.1	ICD-10-CM	MAL NEO CONN SOFT TISS UP LMB SHLDR
CCI	Any malignancy	C49.10	ICD-10-CM	MAL NEO CONN SFT TSS UP LIMB SH UNS
CCI	Any malignancy	C49.11	ICD-10-CM	MAL NEO CONN SFT TISS RT UP LMB SH
CCI	Any malignancy	C49.12	ICD-10-CM	MAL NEO CONN SFT TISS LT UP LIMB SH
CCI	Any malignancy	C49.2	ICD-10-CM	MAL NEO CONN SFT TISS LW LIMB HIP
CCI	Any malignancy	C49.20	ICD-10-CM	MAL NEO CONN SFT TISS UNS L LIMB HP
CCI	Any malignancy	C49.21	ICD-10-CM	MAL NEO CONN SFT TISS RT LW LMB HIP
CCI	Any malignancy	C49.22	ICD-10-CM	MAL NEO CONN SFT TISS LT LW LMB HIP
CCI	Any malignancy	C49.3	ICD-10-CM	MAL NEOPLASM CONN SOFT TISS THORAX
CCI	Any malignancy	C49.4	ICD-10-CM	MAL NEOPLASM CONN SOFT TISS ABDOMEN
CCI	Any malignancy	C49.5	ICD-10-CM	MAL NEOPLASM CONN SOFT TISS PELVIS
CCI	Any malignancy	C49.6	ICD-10-CM	MAL NEO CONN SOFT TISS TRUNK UNS
CCI	Any malignancy	C49.8	ICD-10-CM	MAL NEO OVRLP SITES CNCTV&SOFT TISS
CCI	Any malignancy	C49.9	ICD-10-CM	MAL NEOPLASM CONN & SOFT TISS UNS
CCI	Any malignancy	C49.A0	ICD-10-CM	GASTROINTESTINAL ST TUMOR UNS SITE
CCI	Any malignancy	C49.A1	ICD-10-CM	GASTROINTESTINAL ST TUMOR ESOPHAGUS
CCI	Any malignancy	C49.A2	ICD-10-CM	GASTROINTESTINAL ST TUMOR STOMACH
CCI	Any malignancy	C49.A3	ICD-10-CM	GASTROINTESTINAL ST TU SM INTESTINE
CCI	Any malignancy	C49.A4	ICD-10-CM	GASTROINTESTINAL ST TU LG INTESTINE
CCI	Any malignancy	C49.A5	ICD-10-CM	GASTROINTESTINAL STROMAL TU RECTUM
CCI	Any malignancy	C49.A9	ICD-10-CM	GASTROINTESTINAL ST TUMOR OTH SITES
CCI	Any malignancy	C4A	ICD-10-CM	MERKEL CELL CARCINOMA
CCI	Any malignancy	C4A.0	ICD-10-CM	MERKEL CELL CARCINOMA OF LIP
CCI	Any malignancy	C4A.1	ICD-10-CM	MCC OF EYELID INCLUDING CANTHUS
CCI	Any malignancy	C4A.10	ICD-10-CM	MCC OF UNS EYELID INCL CANTHUS
CCI	Any malignancy	C4A.11	ICD-10-CM	MCC OF RIGHT EYELID INCL CANTHUS
CCI	Any malignancy	C4A.111	ICD-10-CM	MERK C CA RT UP EYELID W/CANTHUS
CCI	Any malignancy	C4A.112	ICD-10-CM	MERK C CA RT LOW EYELID W/CANTHUS
CCI	Any malignancy	C4A.12	ICD-10-CM	MCC OF LEFT EYELID INCL CANTHUS
CCI	Any malignancy	C4A.121	ICD-10-CM	MERK C CA LT UPP EYELID W/CANTHUS
CCI	Any malignancy	C4A.122	ICD-10-CM	MERK C CA LT LOW EYELID W/CANTHUS
CCI	Any malignancy	C4A.2	ICD-10-CM	MERKEL CELL CARCINOMA EAR & EAC
CCI	Any malignancy	C4A.20	ICD-10-CM	MERKEL CELL CARCINOMA UNS EAR & EAC
CCI	Any malignancy	C4A.21	ICD-10-CM	MERKEL CELL CARCINOMA RT EAR & EAC
CCI	Any malignancy	C4A.22	ICD-10-CM	MERKEL CELL CARCINOMA LT EAR & EAC
CCI	Any malignancy	C4A.3	ICD-10-CM	MERKEL CELL CA OTH & UNS PART FACE
CCI	Any malignancy	C4A.30	ICD-10-CM	MERKEL CELL CARCINOMA UNS PART FACE
CCI	Any malignancy	C4A.31	ICD-10-CM	MERKEL CELL CARCINOMA OF NOSE
CCI	Any malignancy	C4A.39	ICD-10-CM	MERKEL CELL CARCINOMA OTH PART FACE
CCI	Any malignancy	C4A.4	ICD-10-CM	MERKEL CELL CARCINOMA SCALP & NECK
CCI	Any malignancy	C4A.5	ICD-10-CM	MERKEL CELL CARCINOMA OF TRUNK
CCI	Any malignancy	C4A.51	ICD-10-CM	MERKEL CELL CARCINOMA OF ANAL SKIN
CCI	Any malignancy	C4A.52	ICD-10-CM	MERKEL CELL CARCINOMA SKIN BREAST
CCI	Any malignancy	C4A.59	ICD-10-CM	MERKEL CELL CARCINOMA OTH PRT TRUNK
CCI	Any malignancy	C4A.6	ICD-10-CM	MERKEL CELL CARCINOMA UP LIMB SHLDR
CCI	Any malignancy	C4A.60	ICD-10-CM	MERKEL CELL CA UNS UP LIMB SHLDR
CCI	Any malignancy	C4A.61	ICD-10-CM	MERKEL CELL CA RT UP LIMB SHLDR
CCI	Any malignancy	C4A.62	ICD-10-CM	MERKEL CELL CA LT UP LIMB SHLDR
CCI	Any malignancy	C4A.7	ICD-10-CM	MERKEL CELL CARCINOMA LOW LIMB HIP
CCI	Any malignancy	C4A.70	ICD-10-CM	MERKEL CELL CA UNS LOW LIMB HIP
CCI	Any malignancy	C4A.71	ICD-10-CM	MERKEL CELL CA RT LOW LIMB HIP
CCI	Any malignancy	C4A.72	ICD-10-CM	MERKEL CELL CA LT LOW LIMB HIP
CCI	Any malignancy	C4A.8	ICD-10-CM	MERKEL CELL CARCINOMA OVERLAP SITES
CCI	Any malignancy	C4A.9	ICD-10-CM	MERKEL CELL CARCINOMA UNSPECIFIED
CCI	Any malignancy	C50	ICD-10-CM	MALIGNANT NEOPLASM OF BREAST
CCI	Any malignancy	C50.0	ICD-10-CM	MALIGNANT NEOPLASM NIPPLE & AREOLA
CCI	Any malignancy	C50.01	ICD-10-CM	MAL NEOPLASM NIPPLE & AREOLA FEMALE
CCI	Any malignancy	C50.011	ICD-10-CM	MAL NEO NIPPL AREOLA RT FEMALE BRST
CCI	Any malignancy	C50.012	ICD-10-CM	MAL NEO NIPPL AREOLA LT FEMALE BRST
CCI	Any malignancy	C50.019	ICD-10-CM	MAL NEO NIPPL AREOLA UNS FEMAL BRST
CCI	Any malignancy	C50.02	ICD-10-CM	MALIG NEOPLASM NIPPLE & AREOLA MALE
CCI	Any malignancy	C50.021	ICD-10-CM	MAL NEO NIPPL AREOLA RT MALE BREAST
CCI	Any malignancy	C50.022	ICD-10-CM	MAL NEO NIPPL AREOLA LT MALE BREAST
CCI	Any malignancy	C50.029	ICD-10-CM	MAL NEO NIPPL AREOLA UNS MALE BRST
CCI	Any malignancy	C50.1	ICD-10-CM	MAL NEOPLASM CENTRAL PORTION BREAST
CCI	Any malignancy	C50.11	ICD-10-CM	MAL NEO CENTRAL PORTION BRST FEMALE
CCI	Any malignancy	C50.111	ICD-10-CM	MAL NEO CENTRAL PORTION RT FEM BRST
CCI	Any malignancy	C50.112	ICD-10-CM	MAL NEO CENTRAL PORTION LT FEM BRST
CCI	Any malignancy	C50.119	ICD-10-CM	MAL NEO CENTRL PORTION UNS FEM BRST
CCI	Any malignancy	C50.12	ICD-10-CM	MAL NEO CENTRAL PORTION BREAST MALE
CCI	Any malignancy	C50.121	ICD-10-CM	MAL NEO CENTRL PORTION RT MALE BRST
CCI	Any malignancy	C50.122	ICD-10-CM	MAL NEO CENTRL PORTION LT MALE BRST
CCI	Any malignancy	C50.129	ICD-10-CM	MAL NEO CNTRL PORTION UNS MALE BRST
CCI	Any malignancy	C50.2	ICD-10-CM	MAL NEOPLSM UPPER-INNER QUAD BREAST
CCI	Any malignancy	C50.21	ICD-10-CM	MAL NEO UP-INNER QUAD BREAST FEMALE
CCI	Any malignancy	C50.211	ICD-10-CM	MAL NEO UP-INNER QUAD RT FEM BREAST
CCI	Any malignancy	C50.212	ICD-10-CM	MAL NEO UP-INNER QUAD LT FEM BREAST
CCI	Any malignancy	C50.219	ICD-10-CM	MAL NEO UP-INNER QUAD UNS FEM BRST
CCI	Any malignancy	C50.22	ICD-10-CM	MALIG NEO UP-INNER QUAD BREAST MALE
CCI	Any malignancy	C50.221	ICD-10-CM	MAL NEO UP-INNER QUAD RT MALE BRST
CCI	Any malignancy	C50.222	ICD-10-CM	MAL NEO UP-INNER QUAD LT MALE BRST
CCI	Any malignancy	C50.229	ICD-10-CM	MAL NEO UP-INNER QUAD UNS MALE BRST
CCI	Any malignancy	C50.3	ICD-10-CM	MAL NEOPLASM LOW-INNER QUAD BREAST
CCI	Any malignancy	C50.31	ICD-10-CM	MAL NEO LW-INNER QUAD BREAST FEMALE
CCI	Any malignancy	C50.311	ICD-10-CM	MAL NEO LW-INNER QUAD RT FEM BREAST
CCI	Any malignancy	C50.312	ICD-10-CM	MAL NEO LW-INNER QUAD LT FEM BREAST
CCI	Any malignancy	C50.319	ICD-10-CM	MAL NEO LW-INNER QUAD UNS FEM BRST
CCI	Any malignancy	C50.32	ICD-10-CM	MAL NEO LOW-INNER QUAD BREAST MALE
CCI	Any malignancy	C50.321	ICD-10-CM	MAL NEO LOW-INNER QUAD RT MALE BRST
CCI	Any malignancy	C50.322	ICD-10-CM	MAL NEO LOW-INNER QUAD LT MALE BRST
CCI	Any malignancy	C50.329	ICD-10-CM	MAL NEO LW-INNER QUAD UNS MALE BRST
CCI	Any malignancy	C50.4	ICD-10-CM	MAL NEOPLSM UPPER-OUTER QUAD BREAST
CCI	Any malignancy	C50.41	ICD-10-CM	MAL NEO UP-OUTER QUAD BREAST FEMALE
CCI	Any malignancy	C50.411	ICD-10-CM	MAL NEO UP-OUTER QUAD RT FEM BREAST
CCI	Any malignancy	C50.412	ICD-10-CM	MAL NEO UP-OUTER QUAD LT FEM BREAST
CCI	Any malignancy	C50.419	ICD-10-CM	MAL NEO UP-OUTER QUAD UNS FEM BRST
CCI	Any malignancy	C50.42	ICD-10-CM	MAL NEO UP-OUTER QUAD BREAST MALE
CCI	Any malignancy	C50.421	ICD-10-CM	MAL NEO UP-OUTER QUAD RT MALE BRST
CCI	Any malignancy	C50.422	ICD-10-CM	MAL NEO UP-OUTER QUAD LT MALE BRST
CCI	Any malignancy	C50.429	ICD-10-CM	MAL NEO UP-OUTER QUAD UNS MALE BRST
CCI	Any malignancy	C50.5	ICD-10-CM	MAL NEOPLSM LOWER-OUTER QUAD BREAST
CCI	Any malignancy	C50.51	ICD-10-CM	MAL NEO LW-OUTER QUAD BREAST FEMALE
CCI	Any malignancy	C50.511	ICD-10-CM	MAL NEO LW-OUTER QUAD RT FEM BREAST
CCI	Any malignancy	C50.512	ICD-10-CM	MAL NEO LW-OUTER QUAD LT FEM BREAST
CCI	Any malignancy	C50.519	ICD-10-CM	MAL NEO LW-OUTER QUAD UNS FEM BRST
CCI	Any malignancy	C50.52	ICD-10-CM	MAL NEO LOW-OUTER QUAD BREAST MALE
CCI	Any malignancy	C50.521	ICD-10-CM	MAL NEO LOW-OUTER QUAD RT MALE BRST
CCI	Any malignancy	C50.522	ICD-10-CM	MAL NEO LOW-OUTER QUAD LT MALE BRST
CCI	Any malignancy	C50.529	ICD-10-CM	MAL NEO LW-OUTER QUAD UNS MALE BRST
CCI	Any malignancy	C50.6	ICD-10-CM	MALIG NEOPLASM AXILLARY TAIL BREAST
CCI	Any malignancy	C50.61	ICD-10-CM	MAL NEO AXILLARY TAIL BREAST FEMALE
CCI	Any malignancy	C50.611	ICD-10-CM	MAL NEO AXILLARY TAIL RT FEM BREAST
CCI	Any malignancy	C50.612	ICD-10-CM	MAL NEO AXILLARY TAIL LT FEM BREAST
CCI	Any malignancy	C50.619	ICD-10-CM	MAL NEO AXILLARY TAIL UNS FEM BRST
CCI	Any malignancy	C50.62	ICD-10-CM	MAL NEO AXILLARY TAIL BREAST MALE
CCI	Any malignancy	C50.621	ICD-10-CM	MAL NEO AXILLARY TAIL RT MALE BRST
CCI	Any malignancy	C50.622	ICD-10-CM	MAL NEO AXILLARY TAIL LT MALE BRST
CCI	Any malignancy	C50.629	ICD-10-CM	MAL NEO AXILLARY TAIL UNS MALE BRST
CCI	Any malignancy	C50.8	ICD-10-CM	MAL NEO OVERLAPPING SITES BREAST
CCI	Any malignancy	C50.81	ICD-10-CM	MAL NEO OVERLAP SITES BREAST FEMALE
CCI	Any malignancy	C50.811	ICD-10-CM	MAL NEO OVERLAP SITE RT FEM BREAST
CCI	Any malignancy	C50.812	ICD-10-CM	MAL NEO OVERLAP SITE LT FEM BREAST
CCI	Any malignancy	C50.819	ICD-10-CM	MAL NEO OVERLAP SITE UNS FEM BREAST
CCI	Any malignancy	C50.82	ICD-10-CM	MAL NEO OVERLAP SITES BREAST MALE
CCI	Any malignancy	C50.821	ICD-10-CM	MAL NEO OVERLAP SITE RT MALE BREAST
CCI	Any malignancy	C50.822	ICD-10-CM	MAL NEO OVERLAP SITE LT MALE BREAST
CCI	Any malignancy	C50.829	ICD-10-CM	MAL NEO OVERLAP SITE UNS MALE BRST
CCI	Any malignancy	C50.9	ICD-10-CM	MAL NEOPLASM OF BREAST OF UNS SITE
CCI	Any malignancy	C50.91	ICD-10-CM	MALIG NEOPLASM BREAST UNS SITE FEM
CCI	Any malignancy	C50.911	ICD-10-CM	MAL NEO UNS SITE RT FEMALE BREAST
CCI	Any malignancy	C50.912	ICD-10-CM	MAL NEO UNS SITE LT FEMALE BREAST
CCI	Any malignancy	C50.919	ICD-10-CM	MAL NEO UNS SITE UNS FEMALE BREAST
CCI	Any malignancy	C50.92	ICD-10-CM	MALIG NEOPLASM BREAST UNS SITE MALE
CCI	Any malignancy	C50.921	ICD-10-CM	MAL NEO UNS SITE RIGHT MALE BREAST
CCI	Any malignancy	C50.922	ICD-10-CM	MAL NEO UNS SITE LEFT MALE BREAST
CCI	Any malignancy	C50.929	ICD-10-CM	MAL NEO UNS SITE UNS MALE BREAST
CCI	Any malignancy	C51	ICD-10-CM	MALIGNANT NEOPLASM OF VULVA
CCI	Any malignancy	C51.0	ICD-10-CM	MALIGNANT NEOPLASM OF LABIUM MAJUS
CCI	Any malignancy	C51.1	ICD-10-CM	MALIGNANT NEOPLASM OF LABIUM MINUS
CCI	Any malignancy	C51.2	ICD-10-CM	MALIGNANT NEOPLASM OF CLITORIS
CCI	Any malignancy	C51.8	ICD-10-CM	MALIGNANT NEO OVERLAP SITES VULVA
CCI	Any malignancy	C51.9	ICD-10-CM	MALIGNANT NEOPLASM OF VULVA UNSPEC
CCI	Any malignancy	C52	ICD-10-CM	MALIGNANT NEOPLASM OF VAGINA
CCI	Any malignancy	C53	ICD-10-CM	MALIGNANT NEOPLASM OF CERVIX UTERI
CCI	Any malignancy	C53.0	ICD-10-CM	MALIGNANT NEOPLASM OF ENDOCERVIX
CCI	Any malignancy	C53.1	ICD-10-CM	MALIGNANT NEOPLASM OF EXOCERVIX
CCI	Any malignancy	C53.8	ICD-10-CM	MALIG NEO OVERLAP SITE CERVIX UTERI
CCI	Any malignancy	C53.9	ICD-10-CM	MALIGNANT NEOPLASM CERVIX UTERI UNS
CCI	Any malignancy	C54	ICD-10-CM	MALIGNANT NEOPLASM OF CORPUS UTERI
CCI	Any malignancy	C54.0	ICD-10-CM	MALIGNANT NEOPLASM OF ISTHMUS UTERI
CCI	Any malignancy	C54.1	ICD-10-CM	MALIGNANT NEOPLASM OF ENDOMETRIUM
CCI	Any malignancy	C54.2	ICD-10-CM	MALIGNANT NEOPLASM OF MYOMETRIUM
CCI	Any malignancy	C54.3	ICD-10-CM	MALIGNANT NEOPLASM OF FUNDUS UTERI
CCI	Any malignancy	C54.8	ICD-10-CM	MALIG NEO OVERLAP SITE CORPUS UTERI
CCI	Any malignancy	C54.9	ICD-10-CM	MALIGNANT NEOPLASM CORPUS UTERI UNS
CCI	Any malignancy	C55	ICD-10-CM	MALIGNANT NEOPLASM UTERUS PART UNS
CCI	Any malignancy	C56	ICD-10-CM	MALIGNANT NEOPLASM OF OVARY
CCI	Any malignancy	C56.1	ICD-10-CM	MALIGNANT NEOPLASM OF RIGHT OVARY
CCI	Any malignancy	C56.2	ICD-10-CM	MALIGNANT NEOPLASM OF LEFT OVARY
CCI	Any malignancy	C56.9	ICD-10-CM	MALIGNANT NEOPLASM UNS OVARY
CCI	Any malignancy	C57	ICD-10-CM	MAL NEO OTH UNS FEM GENITAL ORGANS
CCI	Any malignancy	C57.0	ICD-10-CM	MALIGNANT NEOPLASM FALLOPIAN TUBE
CCI	Any malignancy	C57.00	ICD-10-CM	MALIG NEOPLASM UNS FALLOPIAN TUBE
CCI	Any malignancy	C57.01	ICD-10-CM	MALIG NEOPLASM RIGHT FALLOPIAN TUBE
CCI	Any malignancy	C57.02	ICD-10-CM	MALIG NEOPLASM LEFT FALLOPIAN TUBE
CCI	Any malignancy	C57.1	ICD-10-CM	MALIGNANT NEOPLASM BROAD LIGAMENT
CCI	Any malignancy	C57.10	ICD-10-CM	MALIG NEOPLASM UNS BROAD LIGAMENT
CCI	Any malignancy	C57.11	ICD-10-CM	MALIG NEOPLASM RIGHT BROAD LIGAMENT
CCI	Any malignancy	C57.12	ICD-10-CM	MALIG NEOPLASM LEFT BROAD LIGAMENT
CCI	Any malignancy	C57.2	ICD-10-CM	MALIGNANT NEOPLASM ROUND LIGAMENT
CCI	Any malignancy	C57.20	ICD-10-CM	MALIG NEOPLASM UNS ROUND LIGAMENT
CCI	Any malignancy	C57.21	ICD-10-CM	MALIG NEOPLASM RIGHT ROUND LIGAMENT
CCI	Any malignancy	C57.22	ICD-10-CM	MALIG NEOPLASM LEFT ROUND LIGAMENT
CCI	Any malignancy	C57.3	ICD-10-CM	MALIGNANT NEOPLASM OF PARAMETRIUM
CCI	Any malignancy	C57.4	ICD-10-CM	MALIG NEOPLASM UTERINE ADNEXA UNS
CCI	Any malignancy	C57.7	ICD-10-CM	MAL NEO OTH SPEC FEM GENITAL ORGN
CCI	Any malignancy	C57.8	ICD-10-CM	MAL NEO OVERLAP SITE FEM GENIT ORGN
CCI	Any malignancy	C57.9	ICD-10-CM	MAL NEO FEMALE GENITAL ORGAN UNS
CCI	Any malignancy	C58	ICD-10-CM	MALIGNANT NEOPLASM OF PLACENTA
CCI	Any malignancy	C60	ICD-10-CM	MALIGNANT NEOPLASM OF PENIS
CCI	Any malignancy	C60.0	ICD-10-CM	MALIGNANT NEOPLASM OF PREPUCE
CCI	Any malignancy	C60.1	ICD-10-CM	MALIGNANT NEOPLASM OF GLANS PENIS
CCI	Any malignancy	C60.2	ICD-10-CM	MALIGNANT NEOPLASM OF BODY OF PENIS
CCI	Any malignancy	C60.8	ICD-10-CM	MALIG NEOPLASM OVERLAP SITES PENIS
CCI	Any malignancy	C60.9	ICD-10-CM	MALIGNANT NEOPLASM OF PENIS UNS
CCI	Any malignancy	C61	ICD-10-CM	MALIGNANT NEOPLASM OF PROSTATE
CCI	Any malignancy	C62	ICD-10-CM	MALIGNANT NEOPLASM OF TESTIS
CCI	Any malignancy	C62.0	ICD-10-CM	MALIG NEOPLASM UNDESCENDED TESTIS
CCI	Any malignancy	C62.00	ICD-10-CM	MALIG NEOPLASM UNS UNDESCEND TESTIS
CCI	Any malignancy	C62.01	ICD-10-CM	MALIG NEOPLASM UNDESCEND RT TESTIS
CCI	Any malignancy	C62.02	ICD-10-CM	MALIG NEOPLASM UNDESCEND LT TESTIS
CCI	Any malignancy	C62.1	ICD-10-CM	MALIGNANT NEOPLASM DESCENDED TESTIS
CCI	Any malignancy	C62.10	ICD-10-CM	MALIG NEOPLASM UNS DESCENDED TESTIS
CCI	Any malignancy	C62.11	ICD-10-CM	MALIG NEOPLASM DESCENDED RT TESTIS
CCI	Any malignancy	C62.12	ICD-10-CM	MALIG NEOPLASM DESCENDED LT TESTIS
CCI	Any malignancy	C62.9	ICD-10-CM	MALIGNANT NEOPLASM TESTIS UNS
CCI	Any malignancy	C62.90	ICD-10-CM	MAL NEO UNS TESTIS UNS DESC/UNDESC
CCI	Any malignancy	C62.91	ICD-10-CM	MAL NEO RT TESTIS UNS DESC/UNDESC
CCI	Any malignancy	C62.92	ICD-10-CM	MAL NEO LT TESTIS UNS DESC/UNDESC
CCI	Any malignancy	C63	ICD-10-CM	MAL NEO OTH & UNS MALE GENITAL ORGN
CCI	Any malignancy	C63.0	ICD-10-CM	MALIGNANT NEOPLASM OF EPIDIDYMIS
CCI	Any malignancy	C63.00	ICD-10-CM	MALIGNANT NEOPLASM UNS EPIDIDYMIS
CCI	Any malignancy	C63.01	ICD-10-CM	MALIGNANT NEOPLASM RIGHT EPIDIDYMIS
CCI	Any malignancy	C63.02	ICD-10-CM	MALIGNANT NEOPLASM LEFT EPIDIDYMIS
CCI	Any malignancy	C63.1	ICD-10-CM	MALIGNANT NEOPLASM SPERMATIC CORD
CCI	Any malignancy	C63.10	ICD-10-CM	MALIG NEOPLASM UNS SPERMATIC CORD
CCI	Any malignancy	C63.11	ICD-10-CM	MALIG NEOPLASM RIGHT SPERMATIC CORD
CCI	Any malignancy	C63.12	ICD-10-CM	MALIG NEOPLASM LEFT SPERMATIC CORD
CCI	Any malignancy	C63.2	ICD-10-CM	MALIGNANT NEOPLASM OF SCROTUM
CCI	Any malignancy	C63.7	ICD-10-CM	MAL NEO OTH SPEC MALE GENITAL ORGAN
CCI	Any malignancy	C63.8	ICD-10-CM	MAL NEO OVRLP SITES MALE GENIT ORGN
CCI	Any malignancy	C63.9	ICD-10-CM	MAL NEOPLASM MALE GENITAL ORGAN UNS
CCI	Any malignancy	C64	ICD-10-CM	MALIG NEO KIDNEY NO RENAL PELVIS
CCI	Any malignancy	C64.1	ICD-10-CM	MALIG NEO RT KIDNEY NO RENAL PELVIS
CCI	Any malignancy	C64.2	ICD-10-CM	MALIG NEO LT KIDNEY NO RENAL PELVIS
CCI	Any malignancy	C64.9	ICD-10-CM	MALIG NEO UNS KIDNEY NO RENAL PELV
CCI	Any malignancy	C65	ICD-10-CM	MALIGNANT NEOPLASM OF RENAL PELVIS
CCI	Any malignancy	C65.1	ICD-10-CM	MALIGNANT NEOPLASM RT RENAL PELVIS
CCI	Any malignancy	C65.2	ICD-10-CM	MALIGNANT NEOPLASM LT RENAL PELVIS
CCI	Any malignancy	C65.9	ICD-10-CM	MALIGNANT NEOPLASM UNS RENAL PELVIS
CCI	Any malignancy	C66	ICD-10-CM	MALIGNANT NEOPLASM OF URETER
CCI	Any malignancy	C66.1	ICD-10-CM	MALIGNANT NEOPLASM OF RIGHT URETER
CCI	Any malignancy	C66.2	ICD-10-CM	MALIGNANT NEOPLASM OF LEFT URETER
CCI	Any malignancy	C66.9	ICD-10-CM	MALIGNANT NEOPLASM UNS URETER
CCI	Any malignancy	C67	ICD-10-CM	MALIGNANT NEOPLASM OF BLADDER
CCI	Any malignancy	C67.0	ICD-10-CM	MALIGNANT NEOPLASM TRIGONE BLADDER
CCI	Any malignancy	C67.1	ICD-10-CM	MALIGNANT NEOPLASM DOME OF BLADDER
CCI	Any malignancy	C67.2	ICD-10-CM	MALIGNANT NEOPLASM LAT WALL BLADDER
CCI	Any malignancy	C67.3	ICD-10-CM	MALIGNANT NEOPLASM ANT WALL BLADDER
CCI	Any malignancy	C67.4	ICD-10-CM	MALIGNANT NEOPLASM POST WALL BLADDR
CCI	Any malignancy	C67.5	ICD-10-CM	MALIGNANT NEOPLASM OF BLADDER NECK
CCI	Any malignancy	C67.6	ICD-10-CM	MALIGNANT NEOPLASM URETERIC ORIFICE
CCI	Any malignancy	C67.7	ICD-10-CM	MALIGNANT NEOPLASM OF URACHUS
CCI	Any malignancy	C67.8	ICD-10-CM	MAL NEOPLASM OVERLAP SITES BLADDER
CCI	Any malignancy	C67.9	ICD-10-CM	MALIGNANT NEOPLASM OF BLADDER UNS
CCI	Any malignancy	C68	ICD-10-CM	MALIGNANT NEO OTH UNS URINARY ORGNS
CCI	Any malignancy	C68.0	ICD-10-CM	MALIGNANT NEOPLASM OF URETHRA
CCI	Any malignancy	C68.1	ICD-10-CM	MALIG NEOPLASM PARAURETHRAL GLANDS
CCI	Any malignancy	C68.8	ICD-10-CM	MALIG NEO OVERLAP SITE URINRY ORGNS
CCI	Any malignancy	C68.9	ICD-10-CM	MALIG NEOPLASM URINARY ORGAN UNS
CCI	Any malignancy	C69	ICD-10-CM	MALIGNANT NEOPLASM OF EYE & ADNEXA
CCI	Any malignancy	C69.0	ICD-10-CM	MALIGNANT NEOPLASM OF CONJUNCTIVA
CCI	Any malignancy	C69.00	ICD-10-CM	MALIGNANT NEOPLASM UNS CONJUNCTIVA
CCI	Any malignancy	C69.01	ICD-10-CM	MALIGNANT NEOPLASM RT CONJUNCTIVA
CCI	Any malignancy	C69.02	ICD-10-CM	MALIGNANT NEOPLASM LT CONJUNCTIVA
CCI	Any malignancy	C69.1	ICD-10-CM	MALIGNANT NEOPLASM OF CORNEA
CCI	Any malignancy	C69.10	ICD-10-CM	MALIGNANT NEOPLASM UNS CORNEA
CCI	Any malignancy	C69.11	ICD-10-CM	MALIGNANT NEOPLASM OF RIGHT CORNEA
CCI	Any malignancy	C69.12	ICD-10-CM	MALIGNANT NEOPLASM OF LEFT CORNEA
CCI	Any malignancy	C69.2	ICD-10-CM	MALIGNANT NEOPLASM OF RETINA
CCI	Any malignancy	C69.20	ICD-10-CM	MALIGNANT NEOPLASM UNS RETINA
CCI	Any malignancy	C69.21	ICD-10-CM	MALIGNANT NEOPLASM OF RIGHT RETINA
CCI	Any malignancy	C69.22	ICD-10-CM	MALIGNANT NEOPLASM OF LEFT RETINA
CCI	Any malignancy	C69.3	ICD-10-CM	MALIGNANT NEOPLASM OF CHOROID
CCI	Any malignancy	C69.30	ICD-10-CM	MALIGNANT NEOPLASM CHOROID UNS SIDE
CCI	Any malignancy	C69.31	ICD-10-CM	MALIGNANT NEOPLASM OF RIGHT CHOROID
CCI	Any malignancy	C69.32	ICD-10-CM	MALIGNANT NEOPLASM OF LEFT CHOROID
CCI	Any malignancy	C69.4	ICD-10-CM	MALIGNANT NEOPLASM OF CILIARY BODY
CCI	Any malignancy	C69.40	ICD-10-CM	MALIGNANT NEOPLASM UNS CILIARY BODY
CCI	Any malignancy	C69.41	ICD-10-CM	MALIGNANT NEOPLASM RT CILIARY BODY
CCI	Any malignancy	C69.42	ICD-10-CM	MALIGNANT NEOPLASM LT CILIARY BODY
CCI	Any malignancy	C69.5	ICD-10-CM	MALIG NEOPLASM LACRIMAL GLAND DUCT
CCI	Any malignancy	C69.50	ICD-10-CM	MALIG NEO UNS LACRIMAL GLAND & DUCT
CCI	Any malignancy	C69.51	ICD-10-CM	MALIG NEO RT LACRIMAL GLAND & DUCT
CCI	Any malignancy	C69.52	ICD-10-CM	MALIG NEO LT LACRIMAL GLAND & DUCT
CCI	Any malignancy	C69.6	ICD-10-CM	MALIGNANT NEOPLASM OF ORBIT
CCI	Any malignancy	C69.60	ICD-10-CM	MALIGNANT NEOPLASM OF UNS ORBIT
CCI	Any malignancy	C69.61	ICD-10-CM	MALIGNANT NEOPLASM OF RIGHT ORBIT
CCI	Any malignancy	C69.62	ICD-10-CM	MALIGNANT NEOPLASM OF LEFT ORBIT
CCI	Any malignancy	C69.8	ICD-10-CM	MAL NEO OVERLAP SITES EYE & ADNEXA
CCI	Any malignancy	C69.80	ICD-10-CM	MAL NEO OVRLAP SITES UNS EYE ADNEXA
CCI	Any malignancy	C69.81	ICD-10-CM	MAL NEO OVRLAP SITES RT EYE ADNEXA
CCI	Any malignancy	C69.82	ICD-10-CM	MAL NEO OVRLAP SITES LT EYE ADNEXA
CCI	Any malignancy	C69.9	ICD-10-CM	MALIGNANT NEOPLASM UNS SITE EYE
CCI	Any malignancy	C69.90	ICD-10-CM	MALIGNANT NEOPLASM UNS SITE UNS EYE
CCI	Any malignancy	C69.91	ICD-10-CM	MALIGNANT NEOPLASM UNS SITE RT EYE
CCI	Any malignancy	C69.92	ICD-10-CM	MALIGNANT NEOPLASM UNS SITE LT EYE
CCI	Any malignancy	C70	ICD-10-CM	MALIGNANT NEOPLASM OF MENINGES
CCI	Any malignancy	C70.0	ICD-10-CM	MALIGNANT NEOPLASM CEREBRL MENINGES
CCI	Any malignancy	C70.1	ICD-10-CM	MALIGNANT NEOPLASM SPINAL MENINGES
CCI	Any malignancy	C70.9	ICD-10-CM	MALIGNANT NEOPLASM MENINGES UNSPEC
CCI	Any malignancy	C71	ICD-10-CM	MALIGNANT NEOPLASM OF BRAIN
CCI	Any malignancy	C71.0	ICD-10-CM	MAL NEO CEREBRM NO LOBES VENTRICLES
CCI	Any malignancy	C71.1	ICD-10-CM	MALIGNANT NEOPLASM OF FRONTAL LOBE
CCI	Any malignancy	C71.2	ICD-10-CM	MALIGNANT NEOPLASM OF TEMPORAL LOBE
CCI	Any malignancy	C71.3	ICD-10-CM	MALIGNANT NEOPLASM OF PARIETAL LOBE
CCI	Any malignancy	C71.4	ICD-10-CM	MALIGNANT NEOPLASM OCCIPITAL LOBE
CCI	Any malignancy	C71.5	ICD-10-CM	MALIGNANT NEOPLASM CEREBRL VENTRICL
CCI	Any malignancy	C71.6	ICD-10-CM	MALIGNANT NEOPLASM OF CEREBELLUM
CCI	Any malignancy	C71.7	ICD-10-CM	MALIGNANT NEOPLASM OF BRAIN STEM
CCI	Any malignancy	C71.8	ICD-10-CM	MALIGNANT NEOPLSM OVRLP SITES BRAIN
CCI	Any malignancy	C71.9	ICD-10-CM	MALIGNANT NEOPLASM OF BRAIN UNSPEC
CCI	Any malignancy	C72	ICD-10-CM	MAL NEO SPINAL CORD C NERV PART CNS
CCI	Any malignancy	C72.0	ICD-10-CM	MALIGNANT NEOPLASM OF SPINAL CORD
CCI	Any malignancy	C72.1	ICD-10-CM	MALIGNANT NEOPLASM OF CAUDA EQUINA
CCI	Any malignancy	C72.2	ICD-10-CM	MALIGNANT NEOPLASM OLFACTORY NERVE
CCI	Any malignancy	C72.20	ICD-10-CM	MALIGNANT NEO UNS OLFACTORY NERVE
CCI	Any malignancy	C72.21	ICD-10-CM	MALIGNANT NEOPLSM RT OLFACTORY NERV
CCI	Any malignancy	C72.22	ICD-10-CM	MALIGNANT NEOPLSM LT OLFACTORY NERV
CCI	Any malignancy	C72.3	ICD-10-CM	MALIGNANT NEOPLASM OF OPTIC NERVE
CCI	Any malignancy	C72.30	ICD-10-CM	MALIGNANT NEOPLASM UNS OPTIC NERVE
CCI	Any malignancy	C72.31	ICD-10-CM	MALIGNANT NEOPLASM RT OPTIC NERVE
CCI	Any malignancy	C72.32	ICD-10-CM	MALIGNANT NEOPLASM LEFT OPTIC NERVE
CCI	Any malignancy	C72.4	ICD-10-CM	MALIGNANT NEOPLASM ACOUSTIC NERVE
CCI	Any malignancy	C72.40	ICD-10-CM	MALIG NEOPLASM UNS ACOUSTIC NERVE
CCI	Any malignancy	C72.41	ICD-10-CM	MALIGNANT NEOPLSM RT ACOUSTIC NERVE
CCI	Any malignancy	C72.42	ICD-10-CM	MALIGNANT NEOPLSM LT ACOUSTIC NERVE
CCI	Any malignancy	C72.5	ICD-10-CM	MALIG NEOPLASM OTH UNS CRANIAL NERV
CCI	Any malignancy	C72.50	ICD-10-CM	MALIGNANT NEOPLSM UNS CRANIAL NERVE
CCI	Any malignancy	C72.59	ICD-10-CM	MALIGNANT NEOPLASM OTH CRANIAL NERV
CCI	Any malignancy	C72.9	ICD-10-CM	MALIG NEOPLASM CNTRL NERV SYS UNS
CCI	Any malignancy	C73	ICD-10-CM	MALIGNANT NEOPLASM OF THYROID GLAND
CCI	Any malignancy	C74	ICD-10-CM	MALIGNANT NEOPLASM OF ADRENAL GLAND
CCI	Any malignancy	C74.0	ICD-10-CM	MAL NEOPLASM CORTEX ADRENAL GLAND
CCI	Any malignancy	C74.00	ICD-10-CM	MAL NEOPLASM CORTEX UNS ADRENL GLND
CCI	Any malignancy	C74.01	ICD-10-CM	MAL NEOPLASM CORTEX RT ADRENAL GLND
CCI	Any malignancy	C74.02	ICD-10-CM	MAL NEOPLASM CORTEX LT ADRENAL GLND
CCI	Any malignancy	C74.1	ICD-10-CM	MAL NEOPLASM MEDULLA ADRENAL GLAND
CCI	Any malignancy	C74.10	ICD-10-CM	MAL NEO MEDULLA UNS ADRENAL GLAND
CCI	Any malignancy	C74.11	ICD-10-CM	MAL NEOPLASM MEDULLA RT ADRENL GLND
CCI	Any malignancy	C74.12	ICD-10-CM	MAL NEOPLASM MEDULLA LT ADRENL GLND
CCI	Any malignancy	C74.9	ICD-10-CM	MAL NEOPLASM UNS PART ADRENAL GLAND
CCI	Any malignancy	C74.90	ICD-10-CM	MAL NEO UNS PART UNS ADRENAL GLAND
CCI	Any malignancy	C74.91	ICD-10-CM	MAL NEO UNS PART RT ADRENAL GLAND
CCI	Any malignancy	C74.92	ICD-10-CM	MAL NEO UND PART LT ADRENAL GLAND
CCI	Any malignancy	C75	ICD-10-CM	MAL NEO OTH ENDOCRN GLND REL STRUCT
CCI	Any malignancy	C75.0	ICD-10-CM	MALIGNANT NEOPLASM PARATHYROID GLND
CCI	Any malignancy	C75.1	ICD-10-CM	MALIGNANT NEOPLASM PITUITARY GLAND
CCI	Any malignancy	C75.2	ICD-10-CM	MAL NEOPLASM CRANIOPHARYNGEAL DUCT
CCI	Any malignancy	C75.3	ICD-10-CM	MALIGNANT NEOPLASM OF PINEAL GLAND
CCI	Any malignancy	C75.4	ICD-10-CM	MALIGNANT NEOPLASM OF CAROTID BODY
CCI	Any malignancy	C75.5	ICD-10-CM	MALIG NEO AORTC BODY OTH PARAGNGLIA
CCI	Any malignancy	C75.8	ICD-10-CM	MALIG NEOPLASM W/PLURIGLANDULAR UNS
CCI	Any malignancy	C75.9	ICD-10-CM	MALIG NEOPLASM ENDOCRINE GLAND UNS
CCI	Any malignancy	C76	ICD-10-CM	MALIG NEOPLASM OTH ILL-DEFIND SITES
CCI	Any malignancy	C76.0	ICD-10-CM	MALIGNANT NEOPLASM HEAD FACE & NECK
CCI	Any malignancy	C76.1	ICD-10-CM	MALIGNANT NEOPLASM OF THORAX
CCI	Any malignancy	C76.2	ICD-10-CM	MALIGNANT NEOPLASM OF ABDOMEN
CCI	Any malignancy	C76.3	ICD-10-CM	MALIGNANT NEOPLASM OF PELVIS
CCI	Any malignancy	C76.4	ICD-10-CM	MALIGNANT NEOPLASM OF UPPER LIMB
CCI	Any malignancy	C76.40	ICD-10-CM	MALIGNANT NEOPLASM UNS UPPER LIMB
CCI	Any malignancy	C76.41	ICD-10-CM	MALIGNANT NEOPLASM RIGHT UPPER LIMB
CCI	Any malignancy	C76.42	ICD-10-CM	MALIGNANT NEOPLASM LEFT UPPER LIMB
CCI	Any malignancy	C76.5	ICD-10-CM	MALIGNANT NEOPLASM OF LOWER LIMB
CCI	Any malignancy	C76.50	ICD-10-CM	MALIGNANT NEOPLASM UNS LOWER LIMB
CCI	Any malignancy	C76.51	ICD-10-CM	MALIGNANT NEOPLASM RIGHT LOWER LIMB
CCI	Any malignancy	C76.52	ICD-10-CM	MALIGNANT NEOPLASM LEFT LOWER LIMB
CCI	Any malignancy	C76.8	ICD-10-CM	MAL NEO OVRLP SITE OTH ILL-DEF SITE
CCI	Any malignancy	C80	ICD-10-CM	MAL NEOPLASM W/O SPECIFICATION SITE
CCI	Any malignancy	C80.0	ICD-10-CM	DISSEMINATED MALIGNANT NEOPLASM UNS
CCI	Any malignancy	C80.1	ICD-10-CM	MALIGNANT PRIMARY NEOPLASM UNS
CCI	Any malignancy	C80.2	ICD-10-CM	MAL NEOPLASM ASSOC W/TRNSPLNT ORGAN
CCI	Any malignancy	C81	ICD-10-CM	HODGKIN LYMPHOMA
CCI	Any malignancy	C81.0	ICD-10-CM	NOD LYMPHOCYT PDMT HODGKIN LYMPHOMA
CCI	Any malignancy	C81.00	ICD-10-CM	NODULAR LYMPHOCYTE HL UNS SITE
CCI	Any malignancy	C81.01	ICD-10-CM	NODULAR LYMPHOCYTE HL HEAD FACE NCK
CCI	Any malignancy	C81.02	ICD-10-CM	NODULAR LYMPHOCYTE HL INTRATHORACIC
CCI	Any malignancy	C81.03	ICD-10-CM	NODULAR LYMPHOCYTE HL INTRA-ABDOMIN
CCI	Any malignancy	C81.04	ICD-10-CM	NODULAR LYMPHOCYTE HL AX & UP LIMB
CCI	Any malignancy	C81.05	ICD-10-CM	NODULAR LYMPHOCYTE HL ING & LW LMB
CCI	Any malignancy	C81.06	ICD-10-CM	NODULAR LYMPHOCYTE HL INTRAPELVIC
CCI	Any malignancy	C81.07	ICD-10-CM	NODULAR LYMPHOCYTE HL SPLEEN
CCI	Any malignancy	C81.08	ICD-10-CM	NODULAR LYMPHOCYTE HL MULTI SITE
CCI	Any malignancy	C81.09	ICD-10-CM	NODULAR LYMPHCYT EXTRANOD SOLID ORG
CCI	Any malignancy	C81.11	ICD-10-CM	NS HL LYMPH NODES HEAD FACE & NECK
CCI	Any malignancy	C81.12	ICD-10-CM	NODULR SCLER HODGKIN LYMPHOMA IT LN
CCI	Any malignancy	C81.13	ICD-10-CM	NODULR SCLER HODGKIN LYMPHOMA IA LN
CCI	Any malignancy	C81.14	ICD-10-CM	NS HODGKIN LYMPHOMA LN AX UP LIMB
CCI	Any malignancy	C81.15	ICD-10-CM	NS HL LYMPH NODES ING REG LW LIMB
CCI	Any malignancy	C81.16	ICD-10-CM	NS HODGKIN LYMPHOMA INTRAPELVIC LN
CCI	Any malignancy	C81.17	ICD-10-CM	NOD SCLER HODGKIN LYMPHOMA SPLEEN
CCI	Any malignancy	C81.18	ICD-10-CM	NS HODGKIN LYMPHOMA LN MX SITES
CCI	Any malignancy	C81.19	ICD-10-CM	NS HL EXTRANODAL SOLID ORGAN SITES
CCI	Any malignancy	C81.20	ICD-10-CM	MIXED CELLULARITY HL UNSPEC SITE
CCI	Any malignancy	C81.21	ICD-10-CM	MC HL LYMPH NODES HEAD FACE & NECK
CCI	Any malignancy	C81.22	ICD-10-CM	MC HODGKIN LYMPHOMA INTRATHORAC LN
CCI	Any malignancy	C81.23	ICD-10-CM	MC HODGKIN LYMPHOMA INTRA-ABDOM LN
CCI	Any malignancy	C81.24	ICD-10-CM	MC HODGKIN LYMPHOMA LN AX & UP LIMB
CCI	Any malignancy	C81.25	ICD-10-CM	MC HL LYMPH NODES ING REG & LW LIMB
CCI	Any malignancy	C81.26	ICD-10-CM	MC HODGKIN LYMPHOMA INTRAPELVIC LN
CCI	Any malignancy	C81.27	ICD-10-CM	MC HODGKIN LYMPHOMA SPLEEN
CCI	Any malignancy	C81.28	ICD-10-CM	MC HODGKIN LYMPHOMA LN MX SITES
CCI	Any malignancy	C81.29	ICD-10-CM	MC HL EXTRANODAL & SOLID ORG SITES
CCI	Any malignancy	C81.3	ICD-10-CM	LYMPHOCYTE DEPLETD HODGKIN LYMPHOMA
CCI	Any malignancy	C81.30	ICD-10-CM	LD HODGKIN LYMPHOMA UNSPEC SITE
CCI	Any malignancy	C81.31	ICD-10-CM	LD CHL NODES HEAD FACE NECK
CCI	Any malignancy	C81.32	ICD-10-CM	LD HODGKIN LYMPHOMA IT LYMPH NODES
CCI	Any malignancy	C81.33	ICD-10-CM	LD HODGKIN LYMPHOMA INTRA-ABD LN
CCI	Any malignancy	C81.34	ICD-10-CM	LD HODGKIN LYMPHOMA LN AX & UP LIMB
CCI	Any malignancy	C81.35	ICD-10-CM	LD HL LN INGUINAL REGION & LW LIMB
CCI	Any malignancy	C81.36	ICD-10-CM	LD HODGKIN LYMPHOMA INTRAPELVIC LN
CCI	Any malignancy	C81.37	ICD-10-CM	LD HODGKIN LYMPHOMA SPLEEN
CCI	Any malignancy	C81.38	ICD-10-CM	LD HODGKIN LYMPHOMA LN MX SITES
CCI	Any malignancy	C81.39	ICD-10-CM	LD HL EXTRANODAL & SOLID ORG SITES
CCI	Any malignancy	C81.4	ICD-10-CM	LYMPHOCYTE-RICH HODGKIN LYMPHOMA
CCI	Any malignancy	C81.40	ICD-10-CM	LYM-RICH HODGKIN LYMPHOMA UNS SITE
CCI	Any malignancy	C81.41	ICD-10-CM	LYM-RICH HL LN HEAD FACE & NECK
CCI	Any malignancy	C81.42	ICD-10-CM	LYM-RICH HODGKIN LYMPHOMA IT LN
CCI	Any malignancy	C81.43	ICD-10-CM	LYM-RICH HODGKIN LYMPHOMA IA LN
CCI	Any malignancy	C81.44	ICD-10-CM	LYM-RICH HODGKIN LY LN AX UP LIMB
CCI	Any malignancy	C81.45	ICD-10-CM	LYM-RICH HL LN INGUINAL REG LW LIMB
CCI	Any malignancy	C81.46	ICD-10-CM	LYMPHOCYTE-RICH HL INTRAPELV LN
CCI	Any malignancy	C81.47	ICD-10-CM	LYM-RICH HODGKIN LYMPHOMA SPLEEN
CCI	Any malignancy	C81.48	ICD-10-CM	LYM-RICH HODGKIN LYMPHOMA LN MX STS
CCI	Any malignancy	C81.49	ICD-10-CM	LYM-RICH HL EXTRANODL & SLD ORG STS
CCI	Any malignancy	C81.7	ICD-10-CM	OTHER HODGKIN LYMPHOMA
CCI	Any malignancy	C81.70	ICD-10-CM	OTHER HODGKIN LYMPHOMA UNSPEC SITE
CCI	Any malignancy	C81.72	ICD-10-CM	OTHER HODGKIN LYMPHOMA IT LYMPH NO
CCI	Any malignancy	C81.73	ICD-10-CM	OTHER HODGKIN LYMPHOMA IA LYMPH NO
CCI	Any malignancy	C81.74	ICD-10-CM	OTHER HODGKIN LY LN AX & UPPER LIMB
CCI	Any malignancy	C81.75	ICD-10-CM	OTH HODGKN LY LN ING REG & LW LIMB
CCI	Any malignancy	C81.76	ICD-10-CM	OTHER HODGKIN LYMPHOMA INTRAPELV LN
CCI	Any malignancy	C81.77	ICD-10-CM	OTHER HODGKIN LYMPHOMA SPLEEN
CCI	Any malignancy	C81.78	ICD-10-CM	OTHER HODGKN LYMPHOMA LN MX SITES
CCI	Any malignancy	C81.79	ICD-10-CM	OTHER HL EXTRANODAL & SLD ORG STS
CCI	Any malignancy	C81.9	ICD-10-CM	HODGKIN LYMPHOMA UNSPECIFIED
CCI	Any malignancy	C81.90	ICD-10-CM	HODGKIN LYMPHOMA UNS UNS SITE
CCI	Any malignancy	C81.91	ICD-10-CM	HODGKIN LYMPHOMA UNS NODES HEAD NCK
CCI	Any malignancy	C81.92	ICD-10-CM	HODGKIN LYMPHOMA UNS INTRATHOR NODE
CCI	Any malignancy	C81.93	ICD-10-CM	HODGKIN LYMPHOMA UNS INTRA-ABD NODE
CCI	Any malignancy	C81.94	ICD-10-CM	HODGKIN LYMPHOMA UNS NODE AX UP LMB
CCI	Any malignancy	C81.95	ICD-10-CM	HODGKIN LYMPH UNS NODES ING LW LIMB
CCI	Any malignancy	C81.96	ICD-10-CM	HODGKIN LYMPHOMA UNS INTRAPELV NODE
CCI	Any malignancy	C81.97	ICD-10-CM	HODGKIN LYMPHOMA UNS SPLEEN
CCI	Any malignancy	C81.98	ICD-10-CM	HODGKIN LYMPHOMA UNS NODES MX SITE
CCI	Any malignancy	C81.99	ICD-10-CM	HODGKIN LYMP UNS EXTRANOD SOLID ORG
CCI	Any malignancy	C82	ICD-10-CM	FOLLICULAR LYMPHOMA
CCI	Any malignancy	C82.0	ICD-10-CM	FOLLICULAR LYMPHOMA GRADE I
CCI	Any malignancy	C82.00	ICD-10-CM	FL GRADE I UNSPECIFIED SITE
CCI	Any malignancy	C82.01	ICD-10-CM	FL GRADE I NODES HEAD FACE & NECK
CCI	Any malignancy	C82.02	ICD-10-CM	FL GRADE I INTRATHORACIC NODES
CCI	Any malignancy	C82.03	ICD-10-CM	FL GRADE I INTRA-ABDOMINAL NODES
CCI	Any malignancy	C82.04	ICD-10-CM	FL GRADE I NODES AXILLA & UP LIMB
CCI	Any malignancy	C82.05	ICD-10-CM	FL GRADE I NODES INGUINAL & LW LIMB
CCI	Any malignancy	C82.06	ICD-10-CM	FL GRADE I INTRAPELVIC NODES
CCI	Any malignancy	C82.07	ICD-10-CM	FOLLICULAR LYMPHOMA GRADE I SPLEEN
CCI	Any malignancy	C82.08	ICD-10-CM	FL GRADE I NODES MULTIPLE SITE
CCI	Any malignancy	C82.09	ICD-10-CM	FL GRADE I EXTRANODAL & SOLID ORGN
CCI	Any malignancy	C82.1	ICD-10-CM	FOLLICULAR LYMPHOMA GRADE II
CCI	Any malignancy	C82.10	ICD-10-CM	FL GRADE II UNSPECIFIED SITE
CCI	Any malignancy	C82.11	ICD-10-CM	FL GRADE II NODES HEAD FACE & NECK
CCI	Any malignancy	C82.12	ICD-10-CM	FL GRADE II INTRATHORACIC NODES
CCI	Any malignancy	C82.13	ICD-10-CM	FL GRADE II INTRA-ABDOMINAL NODES
CCI	Any malignancy	C82.14	ICD-10-CM	FL GRADE II NODES AXILLA & UP LIMB
CCI	Any malignancy	C82.15	ICD-10-CM	FL GRADE II NODES INGUINAL LW LIMB
CCI	Any malignancy	C82.16	ICD-10-CM	FL GRADE II INTRAPELVIC NODES
CCI	Any malignancy	C82.17	ICD-10-CM	FL GRADE II SPLEEN
CCI	Any malignancy	C82.18	ICD-10-CM	FL GRADE II NODES MULTIPLE SITE
CCI	Any malignancy	C82.19	ICD-10-CM	FL GRADE II EXTRANODAL & SOLID ORGN
CCI	Any malignancy	C82.2	ICD-10-CM	FOLLICULAR LYMPHOMA GRADE III UNS
CCI	Any malignancy	C82.20	ICD-10-CM	FL GRADE III UNS UNSPECIFIED SITE
CCI	Any malignancy	C82.21	ICD-10-CM	FL GRADE III UNS NODE HEAD FCE NCK
CCI	Any malignancy	C82.22	ICD-10-CM	FL GRADE III UNS INTRATHOR NODES
CCI	Any malignancy	C82.23	ICD-10-CM	FL GRADE III UNS INTRA-ABDOM NODES
CCI	Any malignancy	C82.24	ICD-10-CM	FL GRADE III UNS NODES AX & UP LIMB
CCI	Any malignancy	C82.25	ICD-10-CM	FL GRADE III UNS NODES ING & LW LMB
CCI	Any malignancy	C82.26	ICD-10-CM	FL GRADE III UNS INTRAPELVIC NODES
CCI	Any malignancy	C82.27	ICD-10-CM	FL GRADE III UNSPECIFIED SPLEEN
CCI	Any malignancy	C82.28	ICD-10-CM	FL GRADE III UNS NODES MX SITE
CCI	Any malignancy	C82.29	ICD-10-CM	FL GRADE III UNS XTRANOD SOLID ORGN
CCI	Any malignancy	C82.3	ICD-10-CM	FOLLICULAR LYMPHOMA GRADE IIIA
CCI	Any malignancy	C82.30	ICD-10-CM	FL GRADE IIIA UNSPECIFIED SITE
CCI	Any malignancy	C82.31	ICD-10-CM	FL GRADE IIIA NODES HEAD FACE & NCK
CCI	Any malignancy	C82.32	ICD-10-CM	FL GRADE IIIA INTRATHORACIC NODES
CCI	Any malignancy	C82.33	ICD-10-CM	FL GRADE IIIA INTRA-ABDOM NODES
CCI	Any malignancy	C82.34	ICD-10-CM	FL GRADE IIIA NODES AX & UP LIMB
CCI	Any malignancy	C82.35	ICD-10-CM	FL GRADE IIIA NODES ING & LW LIMB
CCI	Any malignancy	C82.36	ICD-10-CM	FL GRADE IIIA INTRAPELVIC LYM NODES
CCI	Any malignancy	C82.37	ICD-10-CM	FL GRADE IIIA SPLEEN
CCI	Any malignancy	C82.38	ICD-10-CM	FL GRADE IIIA NODES MULTIPLE SITE
CCI	Any malignancy	C82.39	ICD-10-CM	FL GRADE IIIA EXTRANOD & SOLID ORGN
CCI	Any malignancy	C82.4	ICD-10-CM	FOLLICULAR LYMPHOMA GRADE IIIB
CCI	Any malignancy	C82.40	ICD-10-CM	FL GRADE IIIB UNSPECIFIED SITE
CCI	Any malignancy	C82.41	ICD-10-CM	FL GRADE IIIB NODES HEAD FCE & NCK
CCI	Any malignancy	C82.42	ICD-10-CM	FL GRADE IIIB INTRATHOR NODES
CCI	Any malignancy	C82.43	ICD-10-CM	FL GRADE IIIB INTRA-ABD LYMPH NODES
CCI	Any malignancy	C82.44	ICD-10-CM	FL GRADE IIIB NODES AX & UP LIMB
CCI	Any malignancy	C82.45	ICD-10-CM	FL GRADE IIIB NODES ING & LW LIMB
CCI	Any malignancy	C82.46	ICD-10-CM	FL GRADE IIIB INTRAPELV LYMPH NODES
CCI	Any malignancy	C82.47	ICD-10-CM	FL GRADE IIIB SPLEEN
CCI	Any malignancy	C82.48	ICD-10-CM	FL GRADE IIIB NODES MULTIPLE SITES
CCI	Any malignancy	C82.49	ICD-10-CM	FL GRADE IIIB EXTRANODAL SOLID ORGN
CCI	Any malignancy	C82.5	ICD-10-CM	DIFFUSE FOLLICLE CENTER LYMPHOMA
CCI	Any malignancy	C82.50	ICD-10-CM	DIFFUSE FCL UNSPECIFIED SITE
CCI	Any malignancy	C82.51	ICD-10-CM	DIFFUSE FCL NODES HEAD FACE & NECK
CCI	Any malignancy	C82.52	ICD-10-CM	DIFFUSE FCL INTRATHORACIC NODES
CCI	Any malignancy	C82.53	ICD-10-CM	DIFFUSE FCL INTRA-ABDOMINAL NODES
CCI	Any malignancy	C82.54	ICD-10-CM	DIFFUSE FCL NODES AXILLA & UP LIMB
CCI	Any malignancy	C82.55	ICD-10-CM	DIFFUSE FCL NODES INGUNAL & LW LIMB
CCI	Any malignancy	C82.56	ICD-10-CM	DIFFUSE FCL INTRAPELVIC NODES
CCI	Any malignancy	C82.57	ICD-10-CM	DIFFUSE FCL SPLEEN
CCI	Any malignancy	C82.58	ICD-10-CM	DIFFUSE FCL NODES MULTIPLE SITE
CCI	Any malignancy	C82.59	ICD-10-CM	DIFFUSE FCL EXTRANODAL SOLID ORGN
CCI	Any malignancy	C82.6	ICD-10-CM	CUTANEOUS FOLLICLE CENTER LYMPHOMA
CCI	Any malignancy	C82.60	ICD-10-CM	CUTANEOUS FCL UNSPECIFIED SITE
CCI	Any malignancy	C82.61	ICD-10-CM	CUTANEOUS FCL NODES HEAD FACE & NCK
CCI	Any malignancy	C82.62	ICD-10-CM	CUTANEOUS FCL INTRATHORACIC NODES
CCI	Any malignancy	C82.63	ICD-10-CM	CUTANEOUS FCL INTRA-ABDOMINAL NODES
CCI	Any malignancy	C82.64	ICD-10-CM	CUTANEOUS FCL NODES AXILLA UP LIMB
CCI	Any malignancy	C82.65	ICD-10-CM	CUTANEOUS FCL INGUINAL & LOW LIMB
CCI	Any malignancy	C82.66	ICD-10-CM	CUTANEOUS FCL INTRAPELVIC NODES
CCI	Any malignancy	C82.67	ICD-10-CM	CUTANEOUS FCL SPLEEN
CCI	Any malignancy	C82.68	ICD-10-CM	CUTANEOUS FCL NODES MULTIPLE SITE
CCI	Any malignancy	C82.69	ICD-10-CM	CUTANEOUS FCL EXTRANODL SOLID ORGAN
CCI	Any malignancy	C82.8	ICD-10-CM	OTHER TYPES OF FOLLICULAR LYMPHOMA
CCI	Any malignancy	C82.80	ICD-10-CM	OTH TYPES FOLL LYMPHOMA UNS SITE
CCI	Any malignancy	C82.81	ICD-10-CM	OTH TYPES FL NODES HEAD FACE & NECK
CCI	Any malignancy	C82.82	ICD-10-CM	OTH TYPES FL INTRATHORACIC NODES
CCI	Any malignancy	C82.83	ICD-10-CM	OTH TYPES FL INTRA-ABDOMINAL NODES
CCI	Any malignancy	C82.84	ICD-10-CM	OTH TYPES FL NODES AXILLA & UP LIMB
CCI	Any malignancy	C82.85	ICD-10-CM	OTH TYPES FL NODES ING RGN & LW LMB
CCI	Any malignancy	C82.86	ICD-10-CM	OTH TYPES FL INTRAPELVIC NODES
CCI	Any malignancy	C82.87	ICD-10-CM	OTH TYPES FOLLICULR LYMPHOMA SPLEEN
CCI	Any malignancy	C82.88	ICD-10-CM	OTH TYPES FL LYMPH NODES MX SITES
CCI	Any malignancy	C82.89	ICD-10-CM	OTH TYPES FL EXTRANODAL SOLID ORGN
CCI	Any malignancy	C82.9	ICD-10-CM	FOLLICULAR LYMPHOMA UNSPECIFIED
CCI	Any malignancy	C82.90	ICD-10-CM	FOLLICULAR LYMPHOMA UNS UNS SITE
CCI	Any malignancy	C82.91	ICD-10-CM	FOLL LYMPHOMA UNS NODE HEAD FCE NCK
CCI	Any malignancy	C82.92	ICD-10-CM	FOLL LYMPHOMA UNS INTRATHOR NODES
CCI	Any malignancy	C82.93	ICD-10-CM	FOLL LYMPHOMA UNS INTRA-ABD NODES
CCI	Any malignancy	C82.94	ICD-10-CM	FOLL LYMPHOMA UNS NODES AX UP LIMB
CCI	Any malignancy	C82.95	ICD-10-CM	FOLL LYMPHOMA UNS NODES ING LW LIMB
CCI	Any malignancy	C82.96	ICD-10-CM	FOLL LYMPHOMA UNS INTRAPELV NODES
CCI	Any malignancy	C82.97	ICD-10-CM	FOLL LYMPHOMA UNS SPLEEN
CCI	Any malignancy	C82.98	ICD-10-CM	FOLL LYMPHOMA UNS NODES MX SITES
CCI	Any malignancy	C82.99	ICD-10-CM	FOLL LYMPHOMA UNS XTRANOD SOLID ORG
CCI	Any malignancy	C83	ICD-10-CM	NON-FOLLICULAR LYMPHOMA
CCI	Any malignancy	C83.0	ICD-10-CM	SMALL CELL B-CELL LYMPHOMA
CCI	Any malignancy	C83.00	ICD-10-CM	SMALL CELL BCL UNSPECIFIED SITE
CCI	Any malignancy	C83.01	ICD-10-CM	SMALL CELL BCL NODES HEAD FCE & NCK
CCI	Any malignancy	C83.02	ICD-10-CM	SMALL CELL BCL INTRATHORACIC NODES
CCI	Any malignancy	C83.03	ICD-10-CM	SMALL CELL BCL INTRA-ABDOMINL NODES
CCI	Any malignancy	C83.04	ICD-10-CM	SMALL CELL BCL NODES AX & UP LIMB
CCI	Any malignancy	C83.05	ICD-10-CM	SMALL CELL BCL NODES ING & LOW LIMB
CCI	Any malignancy	C83.06	ICD-10-CM	SMALL CELL BCL INTRAPELV NODES
CCI	Any malignancy	C83.07	ICD-10-CM	SMALL CELL B-CELL LYMPHOMA SPLEEN
CCI	Any malignancy	C83.08	ICD-10-CM	SMALL CELL BCL NODES MX SITES
CCI	Any malignancy	C83.09	ICD-10-CM	SMALL CELL BCL EXTRANODL SOLID ORGN
CCI	Any malignancy	C83.1	ICD-10-CM	MANTLE CELL LYMPHOMA
CCI	Any malignancy	C83.10	ICD-10-CM	MANTLE CELL LYMPHOMA UNS SITE
CCI	Any malignancy	C83.11	ICD-10-CM	MANTLE CELL LYMPHOMA NODE HEAD NCK
CCI	Any malignancy	C83.12	ICD-10-CM	MANTLE CELL LYMPHOMA INTRATHOR NODE
CCI	Any malignancy	C83.13	ICD-10-CM	MANTLE CELL LYMPHOMA INTRA-ABD NODE
CCI	Any malignancy	C83.14	ICD-10-CM	MANTLE CELL LYMPHOM NODE AX UP LIMB
CCI	Any malignancy	C83.15	ICD-10-CM	MANTLE CELL LYMPHOM NODE ING LW LMB
CCI	Any malignancy	C83.16	ICD-10-CM	MANTLE CELL LYMPHOMA INTRAPELV NODE
CCI	Any malignancy	C83.17	ICD-10-CM	MANTLE CELL LYMPHOMA SPLEEN
CCI	Any malignancy	C83.18	ICD-10-CM	MANTLE CELL LYMPHOMA NODES MX SITES
CCI	Any malignancy	C83.19	ICD-10-CM	MANTLE CELL LYMPHOMA SOLID ORGAN
CCI	Any malignancy	C83.3	ICD-10-CM	DIFFUSE LARGE B-CELL LYMPHOMA
CCI	Any malignancy	C83.30	ICD-10-CM	DIFFUSE LARGE BCL UNSPECIFIED SITE
CCI	Any malignancy	C83.31	ICD-10-CM	DIFFUSE LARGE BCL NODE HEAD FCE NCK
CCI	Any malignancy	C83.32	ICD-10-CM	DIFFUSE LARGE BCL INTRATHOR NODES
CCI	Any malignancy	C83.33	ICD-10-CM	DIFFUSE LARGE BCL INTRA-ABD NODES
CCI	Any malignancy	C83.34	ICD-10-CM	DIFFUSE LARGE BCL NODES AX & UP LMB
CCI	Any malignancy	C83.35	ICD-10-CM	DIFFUSE LARGE BCL NODES ING LW LIMB
CCI	Any malignancy	C83.36	ICD-10-CM	DIFFUSE LARGE BCL INTRAPELV NODES
CCI	Any malignancy	C83.37	ICD-10-CM	DIFFUSE LARGE BCL SPLEEN
CCI	Any malignancy	C83.38	ICD-10-CM	DIFFUSE LARGE BCL NODES MX SITES
CCI	Any malignancy	C83.39	ICD-10-CM	DIFFUSE LARGE BCL SOLID ORGAN
CCI	Any malignancy	C83.5	ICD-10-CM	LYMPHOBLASTIC DIFFUSE LYMPHOMA
CCI	Any malignancy	C83.50	ICD-10-CM	LYMPHOBLASTIC LYMPHOMA UNS SITE
CCI	Any malignancy	C83.51	ICD-10-CM	LYMPHOBLAST LYMPHOMA NODES HEAD NCK
CCI	Any malignancy	C83.52	ICD-10-CM	LYMPHOBLAST LYMPHOMA INTRTHOR NODES
CCI	Any malignancy	C83.53	ICD-10-CM	LYMPHOBLAST LYMPHOMA INTRA-ABD NODE
CCI	Any malignancy	C83.54	ICD-10-CM	LYMPHOBLAST LYMPHOMA NODE AX UP LMB
CCI	Any malignancy	C83.55	ICD-10-CM	LYMPHOBLAST LYMPHOM NODE ING LW LMB
CCI	Any malignancy	C83.56	ICD-10-CM	LYMPHOBLAST LYMPHOMA INTRAPELV NODE
CCI	Any malignancy	C83.57	ICD-10-CM	LYMPHOBLAST LYMPHOMA SPLEEN
CCI	Any malignancy	C83.58	ICD-10-CM	LYMPHOBLAST LYMPHOMA NODES MX SITES
CCI	Any malignancy	C83.59	ICD-10-CM	LYMPHOBLAST LYMPHOMA SOLID ORGAN
CCI	Any malignancy	C83.7	ICD-10-CM	BURKITT LYMPHOMA
CCI	Any malignancy	C83.70	ICD-10-CM	BURKITT LYMPHOMA UNSPECIFIED SITE
CCI	Any malignancy	C83.71	ICD-10-CM	BURKITT LYMPHOMA NODES HEAD FCE NCK
CCI	Any malignancy	C83.72	ICD-10-CM	BURKITT LYMPHOMA INTRATHOR NODES
CCI	Any malignancy	C83.73	ICD-10-CM	BURKITT LYMPHOMA INTRA-ABD NODES
CCI	Any malignancy	C83.74	ICD-10-CM	BURKITT LYMPHOMA NODES AX & UP LIMB
CCI	Any malignancy	C83.75	ICD-10-CM	BURKITT LYMPHOMA NODES ING & LW LMB
CCI	Any malignancy	C83.76	ICD-10-CM	BURKITT LYMPHOMA INTRAPELVIC NODES
CCI	Any malignancy	C83.77	ICD-10-CM	BURKITT LYMPHOMA SPLEEN
CCI	Any malignancy	C83.78	ICD-10-CM	BURKITT LYMPHOMA LYM NODES MX SITES
CCI	Any malignancy	C83.79	ICD-10-CM	BURKITT LYMPHOMA SOLID ORGAN SITE
CCI	Any malignancy	C83.8	ICD-10-CM	OTHER NON-FOLLICULAR LYMPHOMA
CCI	Any malignancy	C83.80	ICD-10-CM	OTH NON-FOLLICULR LYMPHOMA UNS SITE
CCI	Any malignancy	C83.81	ICD-10-CM	OTH NON-FL NODES HEAD FACE & NECK
CCI	Any malignancy	C83.82	ICD-10-CM	OTH NON-FL INTRATHORACIC NODES
CCI	Any malignancy	C83.83	ICD-10-CM	OTH NON-FL INTRA-ABDOMINAL NODES
CCI	Any malignancy	C83.84	ICD-10-CM	OTH NON-FL NODES AXILLA & UP LIMB
CCI	Any malignancy	C83.85	ICD-10-CM	OTH NON-FL NODES ING RGN & LOW LIMB
CCI	Any malignancy	C83.86	ICD-10-CM	OTH NON-FL INTRAPELVIC LYMPH NODES
CCI	Any malignancy	C83.87	ICD-10-CM	OTH NON-FOLLICULAR LYMPHOMA SPLEEN
CCI	Any malignancy	C83.88	ICD-10-CM	OTH NON-FL NODES MULTIPLE SITE
CCI	Any malignancy	C83.89	ICD-10-CM	OTH NON-FL EXTRANODAL & SOLID ORGAN
CCI	Any malignancy	C83.9	ICD-10-CM	NON-FOLLICULAR DIFFUSE LYMPHOMA UNS
CCI	Any malignancy	C83.90	ICD-10-CM	NON-FOLLICULR LYMPHOMA UNS UNS SITE
CCI	Any malignancy	C83.91	ICD-10-CM	NON-FL UNS NODES HEAD FACE & NECK
CCI	Any malignancy	C83.92	ICD-10-CM	NON-FL UNS INTRATHORACIC NODES
CCI	Any malignancy	C83.93	ICD-10-CM	NON-FL UNS INTRA-ABDOMINAL NODES
CCI	Any malignancy	C83.94	ICD-10-CM	NON-FL UNS NODES AXILLA & UP LIMB
CCI	Any malignancy	C83.95	ICD-10-CM	NON-FL UNS NODES ING RGN & LW LIMB
CCI	Any malignancy	C83.96	ICD-10-CM	NON-FL UNS INTRAPELVIC LYMPH NODES
CCI	Any malignancy	C83.97	ICD-10-CM	NON-FOLLICULAR LYMPHOMA UNS SPLEEN
CCI	Any malignancy	C83.98	ICD-10-CM	NON-FOLLICULAR LYM UNS NODE MX SITE
CCI	Any malignancy	C83.99	ICD-10-CM	NON-FL UNS XTRANOD & SLID ORGN SITE
CCI	Any malignancy	C84	ICD-10-CM	MATURE T/NK-CELL LYMPHOMAS
CCI	Any malignancy	C84.0	ICD-10-CM	MYCOSIS FUNGOIDES
CCI	Any malignancy	C84.00	ICD-10-CM	MYCOSIS FUNGOIDES UNSPECIFIED SITE
CCI	Any malignancy	C84.01	ICD-10-CM	MYCOSIS FUNGOIDES NODES HEAD & NCK
CCI	Any malignancy	C84.02	ICD-10-CM	MYCOSIS FUNGOIDES INTRATHOR NODES
CCI	Any malignancy	C84.03	ICD-10-CM	MYCOSIS FUNGOIDES INTRA-ABD NODES
CCI	Any malignancy	C84.04	ICD-10-CM	MYCOSIS FUNGOIDES NODES AX & UP LMB
CCI	Any malignancy	C84.05	ICD-10-CM	MYCOSIS FUNGOIDES NODES ING&LW LIMB
CCI	Any malignancy	C84.06	ICD-10-CM	MYCOSIS FUNGOIDES INTRAPELVIC NODES
CCI	Any malignancy	C84.07	ICD-10-CM	MYCOSIS FUNGOIDES SPLEEN
CCI	Any malignancy	C84.08	ICD-10-CM	MYCOSIS FUNGOIDES NODES MX SITES
CCI	Any malignancy	C84.09	ICD-10-CM	MYCOSIS FUNGOID EXTRANODL SOLID ORG
CCI	Any malignancy	C84.1	ICD-10-CM	SEZARY DISEASE
CCI	Any malignancy	C84.10	ICD-10-CM	SEZARY DISEASE UNSPECIFIED SITE
CCI	Any malignancy	C84.11	ICD-10-CM	SEZARY DISEASE NODES HEAD FACE NECK
CCI	Any malignancy	C84.12	ICD-10-CM	SEZARY DISEASE INTRATHOR NODES
CCI	Any malignancy	C84.13	ICD-10-CM	SEZARY DISEASE INTRA-ABDOM NODES
CCI	Any malignancy	C84.14	ICD-10-CM	SEZARY DISEASE NODES AX & UP LIMB
CCI	Any malignancy	C84.15	ICD-10-CM	SEZARY DISEASE NODES ING & LW LIMB
CCI	Any malignancy	C84.16	ICD-10-CM	SEZARY DISEASE INTRAPELVIC NODES
CCI	Any malignancy	C84.17	ICD-10-CM	SEZARY DISEASE SPLEEN
CCI	Any malignancy	C84.18	ICD-10-CM	SEZARY DISEASE LYMPH NODES MX SITES
CCI	Any malignancy	C84.19	ICD-10-CM	SEZARY DISEASE EXTRANODAL SOLID ORG
CCI	Any malignancy	C84.4	ICD-10-CM	PERIPHERL T-CELL LYMPHOMA NOT CLASS
CCI	Any malignancy	C84.40	ICD-10-CM	PERIPH T-CELL LYMPHOMA NC UNS SITE
CCI	Any malignancy	C84.41	ICD-10-CM	PERIPH T-CELL LYMPHOMA NC HEAD NCK
CCI	Any malignancy	C84.42	ICD-10-CM	PERIPH T-CELL LYMPHOMA NC INTRATHOR
CCI	Any malignancy	C84.43	ICD-10-CM	PERIPH T-CELL LYMPHOMA NC INTRA-ABD
CCI	Any malignancy	C84.44	ICD-10-CM	PERIPH T-CELL LYMPHOMA NC AX UP LMB
CCI	Any malignancy	C84.45	ICD-10-CM	PERIPH T-CELL LYMPHOM NC ING LW LMB
CCI	Any malignancy	C84.46	ICD-10-CM	PERIPH T-CELL LYMPHOMA NC INTRAPLV
CCI	Any malignancy	C84.47	ICD-10-CM	PERIPH T-CELL LYMPHOMA NC SPLEEN
CCI	Any malignancy	C84.48	ICD-10-CM	PERIPH T-CELL LYMPHOMA NC MX SITE
CCI	Any malignancy	C84.49	ICD-10-CM	PERIPH T-CELL LYMPHOMA NC SOLID ORG
CCI	Any malignancy	C84.6	ICD-10-CM	ANAPLASTIC LG CELL LYMPHOMA ALK-POS
CCI	Any malignancy	C84.60	ICD-10-CM	ANAPLASTIC LCL ALK-POS UNS SITE
CCI	Any malignancy	C84.61	ICD-10-CM	ANAPLASTIC LCL ALK-POS HEAD FCE NCK
CCI	Any malignancy	C84.62	ICD-10-CM	ANAPLASTIC LCL ALK-POS INTRATHOR
CCI	Any malignancy	C84.63	ICD-10-CM	ANAPLASTIC LCL ALK-POS INTRA-ABD
CCI	Any malignancy	C84.64	ICD-10-CM	ANAPLASTIC LCL ALK-POS AX & UP LIMB
CCI	Any malignancy	C84.65	ICD-10-CM	ANAPLASTIC LCL ALK-POS ING LW LIMB
CCI	Any malignancy	C84.66	ICD-10-CM	ANAPLASTIC LCL ALK-POS INTRAPELV
CCI	Any malignancy	C84.67	ICD-10-CM	ANAPLASTIC LCL ALK-POS SPLEEN
CCI	Any malignancy	C84.68	ICD-10-CM	ANAPLASTIC LCL ALK-POS MULTI SITES
CCI	Any malignancy	C84.69	ICD-10-CM	ANAPLASTIC LCL ALK-POS SOLID ORGN
CCI	Any malignancy	C84.7	ICD-10-CM	ANAPLASTIC LG CELL LYMPHOMA ALK-NEG
CCI	Any malignancy	C84.70	ICD-10-CM	ANAPLASTIC LCL ALK-NEG UNS SITE
CCI	Any malignancy	C84.71	ICD-10-CM	ANAPLASTIC LCL ALK-NEG HEAD FCE NCK
CCI	Any malignancy	C84.72	ICD-10-CM	ANAPLASTIC LCL ALK-NEG INTRATHOR
CCI	Any malignancy	C84.73	ICD-10-CM	ANAPLASTIC LCL ALK-NEG INTRA-ABD
CCI	Any malignancy	C84.74	ICD-10-CM	ANAPLASTIC LCL ALK-NEG AX UP LIMB
CCI	Any malignancy	C84.75	ICD-10-CM	ANAPLASTIC LCL ALK-NEG ING LW LIMB
CCI	Any malignancy	C84.76	ICD-10-CM	ANAPLASTIC LCL ALK-NEG INTRAPELVIC
CCI	Any malignancy	C84.77	ICD-10-CM	ANAPLASTIC LCL ALK-NEG SPLEEN
CCI	Any malignancy	C84.78	ICD-10-CM	ANAPLASTIC LCL ALK-NEG MULTI SITE
CCI	Any malignancy	C84.79	ICD-10-CM	ANAPLASTIC LCL ALK-NEG SOLID ORGN
CCI	Any malignancy	C84.9	ICD-10-CM	MATURE T/NK-CELL LYMPHOMAS UNS
CCI	Any malignancy	C84.90	ICD-10-CM	MATURE T/NK-CELL LYM UNS UNS SITE
CCI	Any malignancy	C84.91	ICD-10-CM	MATURE T/NK-CELL LYM UNS HEAD & NCK
CCI	Any malignancy	C84.92	ICD-10-CM	MATURE T/NK-CELL LYM UNS INTRATHOR
CCI	Any malignancy	C84.93	ICD-10-CM	MATURE T/NK-CELL LYM UNS INTRA-ABD
CCI	Any malignancy	C84.94	ICD-10-CM	MATURE T/NK-CELL LYM UNS AX UP LMB
CCI	Any malignancy	C84.95	ICD-10-CM	MATURE T/NK-CELL LYM UNS ING LW LMB
CCI	Any malignancy	C84.96	ICD-10-CM	MATURE T/NK-CELL LYM UNS INTRAPELV
CCI	Any malignancy	C84.97	ICD-10-CM	MATURE T/NK-CELL LYM UNS SPLEEN
CCI	Any malignancy	C84.98	ICD-10-CM	MATURE T/NK-CELL LYM UNS MX SITE
CCI	Any malignancy	C84.99	ICD-10-CM	MATURE T/NK-CELL LYM UNS SOLID ORGN
CCI	Any malignancy	C84.A	ICD-10-CM	CUTANEOUS T-CELL LYMPHOMA UNS
CCI	Any malignancy	C84.A0	ICD-10-CM	CUT T-CELL LYMPHOMA UNS UNS SITE
CCI	Any malignancy	C84.A1	ICD-10-CM	CUT T-CELL LYMPHOMA UNS HEAD & NCK
CCI	Any malignancy	C84.A2	ICD-10-CM	CUT T-CELL LYMPHOMA UNS INTRATHOR
CCI	Any malignancy	C84.A3	ICD-10-CM	CUT T-CELL LYMPHOMA UNS INTRA-ABD
CCI	Any malignancy	C84.A4	ICD-10-CM	CUT T-CELL LYMPHOMA UNS AX UP LIMB
CCI	Any malignancy	C84.A5	ICD-10-CM	CUT T-CELL LYMPHOMA UNS ING LW LIMB
CCI	Any malignancy	C84.A6	ICD-10-CM	CUT T-CELL LYMPHOMA UNS INTRAPELV
CCI	Any malignancy	C84.A7	ICD-10-CM	CUT T-CELL LYMPHOMA UNS SPLEEN
CCI	Any malignancy	C84.A8	ICD-10-CM	CUT T-CELL LYMPHOMA UNS MX SITES
CCI	Any malignancy	C84.A9	ICD-10-CM	CUT T-CELL LYMPHOMA UNS SOLID ORGAN
CCI	Any malignancy	C84.Z	ICD-10-CM	OTHER MATURE T/NK-CELL LYMPHOMAS
CCI	Any malignancy	C84.Z0	ICD-10-CM	OTH MAT T/NK-CELL LYMPHOMA UNS SITE
CCI	Any malignancy	C84.Z1	ICD-10-CM	OTH MAT T/NK-CELL LYMPH HEAD NECK
CCI	Any malignancy	C84.Z2	ICD-10-CM	OTH MAT T/NK-CELL LYMPH INTRATHOR
CCI	Any malignancy	C84.Z3	ICD-10-CM	OTH MAT T/NK-CELL LYMPH INTRA-ABD
CCI	Any malignancy	C84.Z4	ICD-10-CM	OTH MAT T/NK-CELL LYMPH AX UP LIMB
CCI	Any malignancy	C84.Z5	ICD-10-CM	OTH MAT T/NK-CELL LYMPH ING LW LIMB
CCI	Any malignancy	C84.Z6	ICD-10-CM	OTH MAT T/NK-CELL LYMPH INTRAPELV
CCI	Any malignancy	C84.Z7	ICD-10-CM	OTH MAT T/NK-CELL LYMPHOMAS SPLEEN
CCI	Any malignancy	C84.Z8	ICD-10-CM	OTH MAT T/NK-CELL LYMPH MX SITES
CCI	Any malignancy	C84.Z9	ICD-10-CM	OTH MAT T/NK-CELL LYMPH SOLID ORGN
CCI	Any malignancy	C85	ICD-10-CM	OTH UNS TYPES NON-HODGKINS LYMPHOMA
CCI	Any malignancy	C85.1	ICD-10-CM	UNSPECIFIED B-CELL LYMPHOMA
CCI	Any malignancy	C85.10	ICD-10-CM	UNS B-CELL LYMPHOMA UNSPECIFIE SITE
CCI	Any malignancy	C85.11	ICD-10-CM	UNS B-CELL LYMPHOMA HEAD FCE & NCK
CCI	Any malignancy	C85.12	ICD-10-CM	UNS B-CELL LYMPHOMA INTRATHOR NODES
CCI	Any malignancy	C85.13	ICD-10-CM	UNS B-CELL LYMPHOMA INTRA-ABD NODES
CCI	Any malignancy	C85.14	ICD-10-CM	UNS B-CELL LYMPHOMA AX & UP LIMB
CCI	Any malignancy	C85.15	ICD-10-CM	UNS B-CELL LYMPHOMA ING & LOW LIMB
CCI	Any malignancy	C85.16	ICD-10-CM	UNS B-CELL LYMPHOMA INTRAPELV NODES
CCI	Any malignancy	C85.17	ICD-10-CM	UNSPECIFIED B-CELL LYMPHOMA SPLEEN
CCI	Any malignancy	C85.18	ICD-10-CM	UNS B-CELL LYMPHOMA NODES MX SITE
CCI	Any malignancy	C85.19	ICD-10-CM	UNS B-CELL LYMPHOMA SOLID ORGAN
CCI	Any malignancy	C85.2	ICD-10-CM	MEDIASTINAL LARGE B-CELL LYMPHOMA
CCI	Any malignancy	C85.20	ICD-10-CM	MEDIASTINAL LBCL UNSPECIFIED SITE
CCI	Any malignancy	C85.21	ICD-10-CM	MEDIASTINAL LBCL NODE HEAD FACE NCK
CCI	Any malignancy	C85.22	ICD-10-CM	MEDIASTINAL LBCL INTRATHOR NODES
CCI	Any malignancy	C85.23	ICD-10-CM	MEDIASTINAL LBCL INTRA-ABD NODES
CCI	Any malignancy	C85.24	ICD-10-CM	MEDIASTINAL LBCL NODES AX & UP LIMB
CCI	Any malignancy	C85.25	ICD-10-CM	MEDIASTINAL LBCL NODES ING LW LIMB
CCI	Any malignancy	C85.26	ICD-10-CM	MEDIASTINAL LBCL INTRAPELVIC NODES
CCI	Any malignancy	C85.27	ICD-10-CM	MEDIASTINAL LBCL SPLEEN
CCI	Any malignancy	C85.28	ICD-10-CM	MEDIASTINAL LBCL NODES OF MX SITES
CCI	Any malignancy	C85.29	ICD-10-CM	MEDIASTINAL LBCL EXTRANOD SOLID ORG
CCI	Any malignancy	C85.8	ICD-10-CM	OTH SPEC TYPES NON-HODGKIN LYMPHOMA
CCI	Any malignancy	C85.80	ICD-10-CM	OTH NON-HODGKIN LYMPHOMA UNS SITE
CCI	Any malignancy	C85.81	ICD-10-CM	OTH NON-HODGKIN LYMPHOMA HEAD NCK
CCI	Any malignancy	C85.82	ICD-10-CM	OTH NON-HODGKIN LYMPHOM INTRATHOR
CCI	Any malignancy	C85.83	ICD-10-CM	OTH NON-HODGKIN LYMPHOMA INTRA-ABD
CCI	Any malignancy	C85.84	ICD-10-CM	OTH NON-HODGKIN LYMPHOMA AX UP LMB
CCI	Any malignancy	C85.85	ICD-10-CM	OTH NON-HODGKIN LYMPH ING LW LIMB
CCI	Any malignancy	C85.86	ICD-10-CM	OTH NON-HODGKIN LYMPHOMA INTRAPELV
CCI	Any malignancy	C85.87	ICD-10-CM	OTH NON-HODGKIN LYMPHOMA SPLEEN
CCI	Any malignancy	C85.88	ICD-10-CM	OTH NON-HODGKIN LYMPHOMA MX SITE
CCI	Any malignancy	C85.89	ICD-10-CM	OTH NON-HODGKIN LYMPHOMA SOLID ORGN
CCI	Any malignancy	C85.9	ICD-10-CM	NON-HODGKIN LYMPHOMA UNSPECIFIED
CCI	Any malignancy	C85.90	ICD-10-CM	NON-HODGKIN LYMPHOMA UNS UNS SITE
CCI	Any malignancy	C85.91	ICD-10-CM	NON-HODGKIN LYMPHOMA UNS HEAD NECK
CCI	Any malignancy	C85.92	ICD-10-CM	NON-HODGKIN LYMPHOMA UNS INTRATHOR
CCI	Any malignancy	C85.93	ICD-10-CM	NON-HODGKIN LYMPHOMA UNS INTRA-ABD
CCI	Any malignancy	C85.94	ICD-10-CM	NON-HODGKIN LYMPHOMA UNS AX UP LIMB
CCI	Any malignancy	C85.95	ICD-10-CM	NON-HODGKIN LYMPHOMA UNS ING LW LMB
CCI	Any malignancy	C85.96	ICD-10-CM	NON-HODGKIN LYMPHOMA UNS INTRAPELV
CCI	Any malignancy	C85.97	ICD-10-CM	NON-HODGKIN LYMPHOMA UNS SPLEEN
CCI	Any malignancy	C85.98	ICD-10-CM	NON-HODGKIN LYMPHOMA UNS MX SITES
CCI	Any malignancy	C85.99	ICD-10-CM	NON-HODGKIN LYMPHOMA UNS SOLID ORGN
CCI	Any malignancy	C86	ICD-10-CM	OTH SPEC TYPES T/NK-CELL LYMPHOMA
CCI	Any malignancy	C86.0	ICD-10-CM	EXTRANODAL NK/T-CELL LYM NASAL TYPE
CCI	Any malignancy	C86.1	ICD-10-CM	HEPATOSPLENIC T-CELL LYMPHOMA
CCI	Any malignancy	C86.2	ICD-10-CM	ENTEROPATHY-TYPE T-CELL LYMPHOMA
CCI	Any malignancy	C86.3	ICD-10-CM	SUBQ PANNICULIT-LIKE T-CELL LYMPHOM
CCI	Any malignancy	C86.4	ICD-10-CM	BLASTIC NK-CELL LYMPHOMA
CCI	Any malignancy	C86.5	ICD-10-CM	ANGIOIMMUNOBLASTIC T-CELL LYMPHOMA
CCI	Any malignancy	C86.6	ICD-10-CM	PRI CUT CD30-POS T-CELL PROLIFERATN
CCI	Any malignancy	C88	ICD-10-CM	MALIGNANT IMMUNOPROLIFERATIVE DZ
CCI	Any malignancy	C88.0	ICD-10-CM	WALDENSTROM MACROGLOBULINEMIA
CCI	Any malignancy	C88.2	ICD-10-CM	HEAVY CHAIN DISEASE
CCI	Any malignancy	C88.3	ICD-10-CM	IMMUNOPROLIFERATIVE SM INTESTINL DZ
CCI	Any malignancy	C88.4	ICD-10-CM	EXTRANODL MARGINAL ZONE BCL OF MALT
CCI	Any malignancy	C88.8	ICD-10-CM	OTH MALIG IMMUNOPROLIFERATIVE DZ
CCI	Any malignancy	C88.9	ICD-10-CM	MALIG IMMUNOPROLIFERATIVE DZ UNS
CCI	Any malignancy	C90	ICD-10-CM	MX MYELOMA & MALIG PLASMA CELL NEO
CCI	Any malignancy	C90.0	ICD-10-CM	MULTIPLE MYELOMA
CCI	Any malignancy	C90.00	ICD-10-CM	MX MYELOMA NOT ACHIEVED REMISSION
CCI	Any malignancy	C90.01	ICD-10-CM	MULTIPLE MYELOMA IN REMISSION
CCI	Any malignancy	C90.02	ICD-10-CM	MULTIPLE MYELOMA IN RELAPSE
CCI	Any malignancy	C90.1	ICD-10-CM	PLASMA CELL LEUKEMIA
CCI	Any malignancy	C90.10	ICD-10-CM	PLASMA CELL LEUKEMIA NOT REMISSION
CCI	Any malignancy	C90.11	ICD-10-CM	PLASMA CELL LEUKEMIA IN REMISSION
CCI	Any malignancy	C90.12	ICD-10-CM	PLASMA CELL LEUKEMIA IN RELAPSE
CCI	Any malignancy	C90.2	ICD-10-CM	EXTRAMEDULLARY PLASMACYTOMA
CCI	Any malignancy	C90.20	ICD-10-CM	EXTRAMEDLLRY PLASMACYTOMA NO REMISS
CCI	Any malignancy	C90.21	ICD-10-CM	EXTRAMEDULLARY PLASMACYTOMA REMISS
CCI	Any malignancy	C90.22	ICD-10-CM	EXTRAMEDLLRY PLSMACYTOMA IN RELAPSE
CCI	Any malignancy	C90.3	ICD-10-CM	SOLITARY PLASMACYTOMA
CCI	Any malignancy	C90.30	ICD-10-CM	SOLITARY PLASMACYTOMA NO REMISSION
CCI	Any malignancy	C90.31	ICD-10-CM	SOLITARY PLASMACYTOMA IN REMISSION
CCI	Any malignancy	C90.32	ICD-10-CM	SOLITARY PLASMACYTOMA IN RELAPSE
CCI	Any malignancy	C91	ICD-10-CM	LYMPHOID LEUKEMIA
CCI	Any malignancy	C91.0	ICD-10-CM	ACUTE LYMPHOBLASTIC LEUKEMIA ALL
CCI	Any malignancy	C91.00	ICD-10-CM	AC LYMPHOBLASTIC LEUKEMIA NO REMISS
CCI	Any malignancy	C91.01	ICD-10-CM	AC LYMPHOBLASTIC LEUKEMIA IN REMISS
CCI	Any malignancy	C91.02	ICD-10-CM	AC LYMPHOBLASTIC LEUKEMIA RELAPSE
CCI	Any malignancy	C91.1	ICD-10-CM	CHRONIC LYMPHOCYTIC LEUKEMIA B-CELL
CCI	Any malignancy	C91.10	ICD-10-CM	CLL B-CELL TYPE NOT ACHIEVED REMISS
CCI	Any malignancy	C91.11	ICD-10-CM	CLL B-CELL TYPE IN REMISSION
CCI	Any malignancy	C91.12	ICD-10-CM	CLL B-CELL TYPE RELAPSE
CCI	Any malignancy	C91.3	ICD-10-CM	PROLYMPHOCYTIC LEUKEMIA B-CELL TYPE
CCI	Any malignancy	C91.30	ICD-10-CM	PLL B-CELL TYPE NOT ACHIEVED REMISS
CCI	Any malignancy	C91.31	ICD-10-CM	PLL B-CELL TYPE IN REMISSION
CCI	Any malignancy	C91.32	ICD-10-CM	PLL B-CELL TYPE IN RELAPSE
CCI	Any malignancy	C91.4	ICD-10-CM	HAIRY CELL LEUKEMIA
CCI	Any malignancy	C91.40	ICD-10-CM	HAIRY CELL LEUKEM NOT ACHVED REMISS
CCI	Any malignancy	C91.41	ICD-10-CM	HAIRY CELL LEUKEMIA IN REMISSION
CCI	Any malignancy	C91.42	ICD-10-CM	HAIRY CELL LEUKEMIA IN RELAPSE
CCI	Any malignancy	C91.5	ICD-10-CM	ADULT T-CELL LEUKEMIA
CCI	Any malignancy	C91.50	ICD-10-CM	ADLT T-CELL LYMPHOMA/LEUK NO REMISS
CCI	Any malignancy	C91.51	ICD-10-CM	ADLT T-CELL LYMPHOMA/LEUK IN REMISS
CCI	Any malignancy	C91.52	ICD-10-CM	ADLT T-CELL LYMPHOMA/LEUK RELAPSE
CCI	Any malignancy	C91.6	ICD-10-CM	PROLYMPHOCYTIC LEUKEMIA T-CELL TYPE
CCI	Any malignancy	C91.60	ICD-10-CM	PLL T-CELL TYPE NOT ACHIEVED REMISS
CCI	Any malignancy	C91.61	ICD-10-CM	PLL T-CELL TYPE IN REMISSION
CCI	Any malignancy	C91.62	ICD-10-CM	PLL T-CELL TYPE IN RELAPSE
CCI	Any malignancy	C91.9	ICD-10-CM	LYMPHOID LEUKEMIA UNSPECIFIED
CCI	Any malignancy	C91.90	ICD-10-CM	LYMPHOID LEUKEMIA UNS NOT REMISSION
CCI	Any malignancy	C91.91	ICD-10-CM	LYMPHOID LEUKEMIA UNS IN REMISSION
CCI	Any malignancy	C91.92	ICD-10-CM	LYMPHOID LEUKEMIA UNS IN RELAPSE
CCI	Any malignancy	C91.A	ICD-10-CM	MATURE B-CELL LEUKEMIA BURKITT-TYPE
CCI	Any malignancy	C91.A0	ICD-10-CM	MAT BCL BURKITT-TYPE NOT REMISSION
CCI	Any malignancy	C91.A1	ICD-10-CM	MAT BCL BURKITT-TYPE IN REMISSION
CCI	Any malignancy	C91.A2	ICD-10-CM	MAT BCL BURKITT-TYPE RELAPSE
CCI	Any malignancy	C91.Z	ICD-10-CM	OTHER LYMPHOID LEUKEMIA
CCI	Any malignancy	C91.Z0	ICD-10-CM	OTH LYMPHOID LEUKEMIA NOT REMISSION
CCI	Any malignancy	C91.Z1	ICD-10-CM	OTH LYMPHOID LEUKEMIA IN REMISSION
CCI	Any malignancy	C91.Z2	ICD-10-CM	OTHER LYMPHOID LEUKEMIA IN RELAPSE
CCI	Any malignancy	C92	ICD-10-CM	MYELOID LEUKEMIA
CCI	Any malignancy	C92.0	ICD-10-CM	ACUTE MYELOBLASTIC LEUKEMIA
CCI	Any malignancy	C92.00	ICD-10-CM	ACUTE MYELOBLASTIC LEUK NOT REMISS
CCI	Any malignancy	C92.01	ICD-10-CM	ACUTE MYELOBLASTIC LEUKEMIA REMISS
CCI	Any malignancy	C92.02	ICD-10-CM	ACUTE MYELOBLASTIC LEUKEMIA RELAPSE
CCI	Any malignancy	C92.1	ICD-10-CM	CHRON MYELOID LEUKEMIA BCR/ABL-POS
CCI	Any malignancy	C92.10	ICD-10-CM	CML BCR/ABL-POSITIVE NOT REMISS
CCI	Any malignancy	C92.11	ICD-10-CM	CML BCR/ABL-POSITIVE IN REMISSION
CCI	Any malignancy	C92.12	ICD-10-CM	CML BCR/ABL-POSITIVE IN RELAPSE
CCI	Any malignancy	C92.2	ICD-10-CM	ATYPICAL CML BCR/ABL-NEGATIVE
CCI	Any malignancy	C92.20	ICD-10-CM	ATYPICAL CML BCR/ABL-NEG NOT REMISS
CCI	Any malignancy	C92.21	ICD-10-CM	ATYPICAL CML BCR/ABL-NEG IN REMISS
CCI	Any malignancy	C92.22	ICD-10-CM	ATYPICAL CML BCR/ABL-NEG IN RLAPSE
CCI	Any malignancy	C92.3	ICD-10-CM	MYELOID SARCOMA
CCI	Any malignancy	C92.30	ICD-10-CM	MYELOID SARCOMA NOT REMISSION
CCI	Any malignancy	C92.31	ICD-10-CM	MYELOID SARCOMA IN REMISSION
CCI	Any malignancy	C92.32	ICD-10-CM	MYELOID SARCOMA IN RELAPSE
CCI	Any malignancy	C92.4	ICD-10-CM	ACUTE PROMYELOCYTIC LEUKEMIA
CCI	Any malignancy	C92.40	ICD-10-CM	AC PROMYELOCYTIC LEUKEMIA NO REMISS
CCI	Any malignancy	C92.41	ICD-10-CM	AC PROMYELOCYTIC LEUKEMIA IN REMISS
CCI	Any malignancy	C92.42	ICD-10-CM	AC PROMYELOCYTIC LEUKEMIA RELAPSE
CCI	Any malignancy	C92.5	ICD-10-CM	ACUTE MYELOMONOCYTIC LEUKEMIA
CCI	Any malignancy	C92.50	ICD-10-CM	AC MYELOMONOCYT LEUKEMIA NO REMISS
CCI	Any malignancy	C92.51	ICD-10-CM	AC MYELOMONOCYT LEUKEMIA IN REMISS
CCI	Any malignancy	C92.52	ICD-10-CM	AC MYELOMONOCYT LEUKEMIA IN RELAPSE
CCI	Any malignancy	C92.6	ICD-10-CM	ACUTE MYELOID LEUKEMIA 11Q23-ABN
CCI	Any malignancy	C92.60	ICD-10-CM	AML W/11Q23-ABNORMAL NOT REMISSION
CCI	Any malignancy	C92.61	ICD-10-CM	AML W/11Q23-ABNORMAL IN REMISSION
CCI	Any malignancy	C92.62	ICD-10-CM	AML W/11Q23-ABNORMAL IN RELAPSE
CCI	Any malignancy	C92.9	ICD-10-CM	MYELOID LEUKEMIA UNSPECIFIED
CCI	Any malignancy	C92.90	ICD-10-CM	MYELOID LEUKEMIA UNS NOT REMISSION
CCI	Any malignancy	C92.91	ICD-10-CM	MYELOID LEUKEMIA UNS IN REMISSION
CCI	Any malignancy	C92.92	ICD-10-CM	MYELOID LEUKEMIA UNS IN RELAPSE
CCI	Any malignancy	C92.A	ICD-10-CM	AML WITH MULTILINEAGE DYSPLASIA
CCI	Any malignancy	C92.A0	ICD-10-CM	AML W/MULTILIN DYSPLASIA NO REMISS
CCI	Any malignancy	C92.A1	ICD-10-CM	AML W/MULTILIN DYSPLASIA IN REMISS
CCI	Any malignancy	C92.A2	ICD-10-CM	AML W/MULTILIN DYSPLASIA IN RELAPSE
CCI	Any malignancy	C92.Z	ICD-10-CM	OTHER MYELOID LEUKEMIA
CCI	Any malignancy	C92.Z0	ICD-10-CM	OTH MYELOID LEUKEMIA NOT REMISS
CCI	Any malignancy	C92.Z1	ICD-10-CM	OTH MYELOID LEUKEMIA IN REMISSION
CCI	Any malignancy	C92.Z2	ICD-10-CM	OTHER MYELOID LEUKEMIA IN RELAPSE
CCI	Any malignancy	C93	ICD-10-CM	MONOCYTIC LEUKEMIA
CCI	Any malignancy	C93.0	ICD-10-CM	ACUTE MONOBLSTIC/MONOCYTIC LEUKEMIA
CCI	Any malignancy	C93.00	ICD-10-CM	AC MONOBLASTIC/-CYTIC LEUK NO REMIS
CCI	Any malignancy	C93.01	ICD-10-CM	AC MONOBLASTIC/-CYTIC LEUK IN REMIS
CCI	Any malignancy	C93.02	ICD-10-CM	AC MONOBLASTIC/-CYTIC LEUK RELAPSE
CCI	Any malignancy	C93.1	ICD-10-CM	CHRONIC MYELOMONOCYTIC LEUKEMIA
CCI	Any malignancy	C93.10	ICD-10-CM	CMML NOT ACHIEVED REMISSION
CCI	Any malignancy	C93.11	ICD-10-CM	CMML IN REMISSION
CCI	Any malignancy	C93.12	ICD-10-CM	CMML IN RELAPSE
CCI	Any malignancy	C93.3	ICD-10-CM	JUVENILE MYELOMONOCYTIC LEUKEMIA
CCI	Any malignancy	C93.30	ICD-10-CM	JMML NOT HAVING ACHIEVED REMISSION
CCI	Any malignancy	C93.31	ICD-10-CM	JMML IN REMISSION
CCI	Any malignancy	C93.32	ICD-10-CM	JMML IN RELAPSE
CCI	Any malignancy	C93.9	ICD-10-CM	MONOCYTIC LEUKEMIA UNSPECIFIED
CCI	Any malignancy	C93.90	ICD-10-CM	MONOCYTIC LEUKEMIA UNS NO REMISSION
CCI	Any malignancy	C93.91	ICD-10-CM	MONOCYTIC LEUKEMIA UNS IN REMISSION
CCI	Any malignancy	C93.92	ICD-10-CM	MONOCYTIC LEUKEMIA UNS IN RELAPSE
CCI	Any malignancy	C93.Z	ICD-10-CM	OTHER MONOCYTIC LEUKEMIA
CCI	Any malignancy	C93.Z0	ICD-10-CM	OTHER MO LEUK NOT HAV ACHIEV REMISS
CCI	Any malignancy	C93.Z1	ICD-10-CM	OTH MONOCYTIC LEUKEMIA IN REMISSION
CCI	Any malignancy	C93.Z2	ICD-10-CM	OTHER MONOCYTIC LEUKEMIA IN RELAPSE
CCI	Any malignancy	C94	ICD-10-CM	OTHER LEUKEMIAS SPECIFIED CELL TYPE
CCI	Any malignancy	C94.0	ICD-10-CM	ACUTE ERYTHROID LEUKEMIA
CCI	Any malignancy	C94.00	ICD-10-CM	ACUTE ERYTHROID LEUKEMIA NO REMISS
CCI	Any malignancy	C94.01	ICD-10-CM	ACUTE ERYTHROID LEUKEMIA REMISSION
CCI	Any malignancy	C94.02	ICD-10-CM	ACUTE ERYTHROID LEUKEMIA IN RELAPSE
CCI	Any malignancy	C94.2	ICD-10-CM	ACUTE MEGAKARYOBLASTIC LEUKEMIA
CCI	Any malignancy	C94.20	ICD-10-CM	AMKL NOT HAVING ACHIEVED REMISSION
CCI	Any malignancy	C94.21	ICD-10-CM	AMKL IN REMISSION
CCI	Any malignancy	C94.22	ICD-10-CM	AMKL IN RELAPSE
CCI	Any malignancy	C94.3	ICD-10-CM	MAST CELL LEUKEMIA
CCI	Any malignancy	C94.30	ICD-10-CM	MAST CELL LEUKEMIA NO ACHIEV REMISS
CCI	Any malignancy	C94.31	ICD-10-CM	MAST CELL LEUKEMIA IN REMISSION
CCI	Any malignancy	C94.32	ICD-10-CM	MAST CELL LEUKEMIA IN RELAPSE
CCI	Any malignancy	C94.4	ICD-10-CM	ACUTE PANMYELOSIS W/MYELOFIBROSIS
CCI	Any malignancy	C94.40	ICD-10-CM	ACUTE PANMYELOSIS W/MF NOT REMISS
CCI	Any malignancy	C94.41	ICD-10-CM	ACUTE PANMYELOSIS W/MF IN REMISSION
CCI	Any malignancy	C94.42	ICD-10-CM	ACUTE PANMYELOSIS W/MF IN RELAPSE
CCI	Any malignancy	C94.6	ICD-10-CM	MYELODYSPLASTIC DZ NOT CLASSIFIED
CCI	Any malignancy	C94.8	ICD-10-CM	OTHER SPECIFIED LEUKEMIAS
CCI	Any malignancy	C94.80	ICD-10-CM	OTH SPEC LEUKEMIAS NO REMISSION
CCI	Any malignancy	C94.81	ICD-10-CM	OTH SPEC LEUKEMIAS IN REMISSION
CCI	Any malignancy	C94.82	ICD-10-CM	OTH SPEC LEUKEMIAS IN RELAPSE
CCI	Any malignancy	C95	ICD-10-CM	LEUKEMIA OF UNSPECIFIED CELL TYPE
CCI	Any malignancy	C95.0	ICD-10-CM	ACUTE LEUKEMIA UNS CELL TYPE
CCI	Any malignancy	C95.00	ICD-10-CM	AC LEUKEMIA UNS CELL TYPE NO REMISS
CCI	Any malignancy	C95.01	ICD-10-CM	AC LEUKEMIA UNS CELL TYPE IN REMISS
CCI	Any malignancy	C95.02	ICD-10-CM	AC LEUKEMIA UNS CELL TYPE RELAPSE
CCI	Any malignancy	C95.1	ICD-10-CM	CHRONIC LEUKEMIA OF UNS CELL TYPE
CCI	Any malignancy	C95.10	ICD-10-CM	CHR LEUKEMIA UNS CELL TYPE NO REMIS
CCI	Any malignancy	C95.11	ICD-10-CM	CHR LEUKEMIA UNS CELL TYPE IN REMIS
CCI	Any malignancy	C95.12	ICD-10-CM	CHR LEUKEMIA UNS CELL TYPE RELAPSE
CCI	Any malignancy	C95.9	ICD-10-CM	LEUKEMIA UNSPECIFIED
CCI	Any malignancy	C95.90	ICD-10-CM	LEUKEMIA UNS NOT ACHIEVD REMISSION
CCI	Any malignancy	C95.91	ICD-10-CM	LEUKEMIA UNSPECIFIED IN REMISSION
CCI	Any malignancy	C95.92	ICD-10-CM	LEUKEMIA UNSPECIFIED IN RELAPSE
CCI	Any malignancy	C96	ICD-10-CM	OTH UNS MAL NEO LYMPHD HEMATOPOIET
CCI	Any malignancy	C96.0	ICD-10-CM	MULTIFOCAL AND MULTISYSTEMIC LCH
CCI	Any malignancy	C96.2	ICD-10-CM	MALIGNANT MAST CELL TUMOR
CCI	Any malignancy	C96.20	ICD-10-CM	MALIGNANT MAST CELL NEOPLASM UNSPEC
CCI	Any malignancy	C96.21	ICD-10-CM	AGGRESSIVE SYSTEMIC MASTOCYTOSIS
CCI	Any malignancy	C96.22	ICD-10-CM	MAST CELL SARCOMA
CCI	Any malignancy	C96.29	ICD-10-CM	OTHER MALIGNANT MAST CELL NEOPLASM
CCI	Any malignancy	C96.4	ICD-10-CM	SARCOMA OF DENDRITIC CELLS
CCI	Any malignancy	C96.5	ICD-10-CM	MULTIFOCAL AND UNISYSTEMIC LCH
CCI	Any malignancy	C96.6	ICD-10-CM	UNIFOCAL LANGERHNS-CELL HISTIOCYTOS
CCI	Any malignancy	C96.9	ICD-10-CM	MAL NEO LYMPHOID HEMATOPOIET UNS
CCI	Any malignancy	C96.A	ICD-10-CM	HISTIOCYTIC SARCOMA
CCI	Any malignancy	C96.Z	ICD-10-CM	OTH MAL NEO LYMPHOID HEMATOPOIETIC
CCI	Any malignancy	141	ICD-9-CM	MALIGNANT NEOPLASM OF TONGUE
CCI	Any malignancy	141.0	ICD-9-CM	MALIGNANT NEOPLASM BASE TONGUE
CCI	Any malignancy	141.1	ICD-9-CM	MALIG NEOPLASM DORS SURFACE TONGUE
CCI	Any malignancy	141.2	ICD-9-CM	MALIG NEOPLSM TIP&LAT BORDER TONGUE
CCI	Any malignancy	141.3	ICD-9-CM	MALIG NEOPLSM VENTRAL SURFCE TONGUE
CCI	Any malignancy	141.4	ICD-9-CM	MAL NEOPLSM ANT 2/3 TONGUE PART UNS
CCI	Any malignancy	141.5	ICD-9-CM	MALIG NEOPLASM JUNC ZONE TONGUE
CCI	Any malignancy	141.6	ICD-9-CM	MALIGNANT NEOPLASM LINGUAL TONSIL
CCI	Any malignancy	141.8	ICD-9-CM	MALIG NEOPLASM OTHER SITES TONGUE
CCI	Any malignancy	141.9	ICD-9-CM	MALIG NEOPLASM TONGUE UNSPEC SITE
CCI	Any malignancy	142	ICD-9-CM	MALIG NEOPLASM MAJOR SALIV GLANDS
CCI	Any malignancy	142.0	ICD-9-CM	MALIGNANT NEOPLASM OF PAROTID GLAND
CCI	Any malignancy	142.1	ICD-9-CM	MALIG NEOPLASM SUBMANDIBULAR GLAND
[truncated: 8,893 more rows]
